# Supplementary material for: The Contribution of Common Genetic Variation to Nicotine and Cotinine Glucuronidation in Multiple Ethnic/Racial Populations
Source: Oxford University Press journal article supplement (doi:10.1158/1055-9965.epi-14-0815), 2014-10-08
Supplement: 10559965epi140815-sup-134771_1_supp_2653860_nbpv0y.xls [file 10559965epi140815-sup-134771_1_supp_2653860_nbpv0y.xls]

## Sheet: Supplemental_Table1_062014
Supplemental Table S1: List of 1,241 globally significant associations (p < 5x10-8) for cotinine glucuronidation
CHR	BP	SNP	A1	A2	INFO	BETA	SE	P	TYPE	GENE
4	69673553	rs115765562	C	A	1.1377	0.1833	0.0064	1.6e-155	intergenic	UGT2B15, UGT2B10
4	69675177	rs116367243	T	A	1.1341	0.1839	0.0064	3.57e-155	intergenic	UGT2B15, UGT2B10
4	69680933	rs114247160	C	T	1.1358	0.1832	0.0064	8.82e-155	upstream	UGT2B10
4	69686221	rs835317	G	T	1.1372	0.1825	0.0064	3.76e-154
4	69682555	rs115443755	G	A	1.1359	0.1825	0.0064	9.03e-154	intronic	UGT2B10
4	69685772	rs116224959	G	A	1.1324	0.182	0.0064	8.71e-153	intronic	UGT2B10
4	69682855	rs116010004	T	G	1.13	0.1815	0.0064	3.83e-152	intronic	UGT2B10
4	69619887	rs115232263	C	A	1.0711	-0.156	0.0063	3.88e-118	intergenic	UGT2B15, UGT2B10
4	69681675	rs146998169	A	T	0.9273	0.1505	0.0063	3.33e-113	upstream	UGT2B10
4	69677744	chr4:69677744:I	C	CTT	1.1508	0.1874	0.008	2.58e-108	intergenic	UGT2B15, UGT2B10
4	69680826	chr4:69680826:D	AAATG	A	1.1424	0.1889	0.0081	1.12e-107
4	69686425	rs835319	G	A	1.1411	0.1883	0.0081	4.57e-107
4	69685482	rs114178203	A	G	1.1451	0.1877	0.0081	8.9e-107	intronic	UGT2B10
4	69686282	rs115814261	G	A	1.1411	0.1876	0.0081	2.42e-106	intronic	UGT2B10
4	69679220	rs114818997	T	A	1.1436	0.1875	0.0081	2.75e-106	intergenic	UGT2B15, UGT2B10
4	69673775	rs294768	A	C	1.1558	0.1862	0.0081	4.36e-106
4	69673123	rs114061210	A	G	1.1547	0.1863	0.0081	5.08e-106	intergenic	UGT2B15, UGT2B10
4	69685048	rs116691621	T	A	1.1441	0.187	0.0081	7.98e-106	intronic	UGT2B10
4	69687987	rs116294140	C	A	1.1234	0.1883	0.0082	1.61e-105	splicing	UGT2B10
4	69678450	rs114477351	T	C	1.1479	0.1855	0.0081	1.33e-104	intergenic	UGT2B15, UGT2B10
4	69673113	rs114863460	C	T	1.136	0.1824	0.0081	2.36e-102	intergenic	UGT2B15, UGT2B10
4	69671064	rs115745146	T	C	1.1431	0.18	0.0082	4.08e-97	intergenic	UGT2B15, UGT2B10
4	69684338	chr4:69684338:D	GA	G	1.0768	0.1781	0.0082	3.89e-95
4	69666984	rs114204995	T	A	1.0792	0.1191	0.0056	7.4e-93	intergenic	UGT2B15, UGT2B10
4	69666382	rs116305335	C	T	1.0793	0.1191	0.0056	8.3e-93	intergenic	UGT2B15, UGT2B10
4	69662451	rs114898162	C	T	1.0806	0.1187	0.0056	2.92e-92	intergenic	UGT2B15, UGT2B10
4	69671235	rs116467558	G	C	1.2007	0.1707	0.008	2.27e-91	intergenic	UGT2B15, UGT2B10
4	69683953	rs114828297	G	C	1.1883	0.1716	0.0081	2.36e-91	intronic	UGT2B10
4	69649428	rs115761002	T	A	1.0842	-0.118	0.0056	3.04e-91	intergenic	UGT2B15, UGT2B10
4	69646608	rs115456036	C	T	1.0843	-0.1179	0.0056	4.3e-91	intergenic	UGT2B15, UGT2B10
4	69669216	rs141360540	G	A	0.9535	-0.1587	0.0075	5.51e-91	intergenic	UGT2B15, UGT2B10
4	69642621	rs116557783	T	C	1.085	-0.1176	0.0056	8.78e-91	intergenic	UGT2B15, UGT2B10
4	69678079	chr4:69678079:I	C	CT	1.084	0.1159	0.0056	4.91e-87	intergenic	UGT2B15, UGT2B10
4	69687964	rs861340	G	A	1.0975	0.1158	0.0056	9.4e-87
4	69678373	rs115880803	C	G	1.0962	0.1158	0.0056	1.74e-86	intergenic	UGT2B15, UGT2B10
4	69685853	rs835316	G	A	1.0962	0.1157	0.0056	2.29e-86
4	69682629	rs114617157	A	G	1.0937	0.1155	0.0056	1.3e-85	intronic	UGT2B10
4	69655555	rs114664732	A	G	1.0783	-0.1138	0.0056	6.94e-85	intergenic	UGT2B15, UGT2B10
4	69662832	rs116143572	G	C	1.0782	0.1136	0.0056	8.01e-85	intergenic	UGT2B15, UGT2B10
4	69684121	rs844342	G	T	1.0971	0.1146	0.0056	3.31e-84
4	69678161	rs115183376	G	T	1.0901	0.1143	0.0056	5.99e-84	intergenic	UGT2B15, UGT2B10
4	69669183	rs146596079	T	C	0.954	-0.1492	0.0074	1.03e-83	intergenic	UGT2B15, UGT2B10
4	69673556	rs114730236	G	A	1.0048	0.1103	0.0057	8.65e-78	intergenic	UGT2B15, UGT2B10
4	69673557	rs116586853	A	T	1.0048	0.1103	0.0057	8.65e-78	intergenic	UGT2B15, UGT2B10
4	69669270	rs114710085	C	T	0.9366	-0.1491	0.0078	1.12e-74	intergenic	UGT2B15, UGT2B10
4	69639151	rs141084263	G	A	1.1532	-0.1424	0.0077	2.62e-71	intergenic	UGT2B15, UGT2B10
4	69638282	rs114911966	G	A	1.1531	-0.1424	0.0077	2.88e-71	intergenic	UGT2B15, UGT2B10
4	69636366	rs140048689	C	A	1.1529	-0.1423	0.0077	3.77e-71	intergenic	UGT2B15, UGT2B10
4	69627634	rs111326963	C	A	1.1504	-0.142	0.0077	4.08e-71	intergenic	UGT2B15, UGT2B10
4	69635056	rs139408548	T	A	1.1529	-0.1422	0.0077	4.5e-71	intergenic	UGT2B15, UGT2B10
4	69627697	rs113284913	C	A	1.1528	-0.1415	0.0077	1.57e-70	intergenic	UGT2B15, UGT2B10
4	69636291	rs183152907	T	C	1.1479	-0.1419	0.0077	2.2e-70	intergenic	UGT2B15, UGT2B10
4	69689122	rs138132853	C	G	1.1287	0.1452	0.0079	8.37e-70	intronic	UGT2B10
4	69673555	chr4:69673555:I	A	AAT	0.897	0.1038	0.0058	2.91e-66	intergenic	UGT2B15, UGT2B10
4	69670507	rs114710642	A	G	1.1264	0.1367	0.0078	4.02e-65	intergenic	UGT2B15, UGT2B10
4	69631265	chr4:69631265:I	G	GA	1.1133	-0.134	0.0078	1.63e-62	intergenic	UGT2B15, UGT2B10
4	69687610	chr4:69687610:I	G	GA	0.9648	0.1243	0.0073	3.93e-61	intronic	UGT2B10
4	69611058	rs115214611	C	T	1.0838	-0.1322	0.0078	2e-60	intergenic	UGT2B15, UGT2B10
4	69672097	rs116089398	G	T	0.8547	0.0942	0.0059	8.24e-54	intergenic	UGT2B15, UGT2B10
4	69669388	rs115219551	A	G	0.8903	-0.0941	0.0061	1.7e-50	intergenic	UGT2B15, UGT2B10
4	69605624	rs192801605	G	A	0.8736	-0.1223	0.008	1.86e-50	intergenic	UGT2B15, UGT2B10
4	69647536	rs114970731	A	G	1.0033	-0.0945	0.0062	3.52e-50	intergenic	UGT2B15, UGT2B10
4	69656777	rs115553258	G	A	1.0046	-0.0943	0.0062	3.9e-50	intergenic	UGT2B15, UGT2B10
4	69658879	rs116001863	T	C	1.0047	-0.0943	0.0062	4.43e-50	intergenic	UGT2B15, UGT2B10
4	69659738	rs115097835	C	T	1.0047	-0.0943	0.0062	4.44e-50	intergenic	UGT2B15, UGT2B10
4	69661615	rs113444800	A	G	1.0046	-0.0943	0.0062	4.7e-50	intergenic	UGT2B15, UGT2B10
4	69663476	rs114057562	G	A	1.0047	-0.0942	0.0062	4.81e-50	intergenic	UGT2B15, UGT2B10
4	69664301	rs140205714	T	G	1.0048	-0.0942	0.0062	4.89e-50	intergenic	UGT2B15, UGT2B10
4	69663632	rs115651349	G	A	1.0047	-0.0942	0.0062	4.97e-50	intergenic	UGT2B15, UGT2B10
4	69642265	rs115485831	A	T	1.0061	-0.0941	0.0062	4.99e-50	intergenic	UGT2B15, UGT2B10
4	69659833	rs113999752	C	A	1	-0.094	0.0062	9.52e-50	intergenic	UGT2B15, UGT2B10
4	69678930	rs114683110	C	G	1.2093	0.1892	0.0126	6.4e-49	intergenic	UGT2B15, UGT2B10
4	69684548	rs114004636	C	G	1.224	0.1906	0.0128	5.25e-48	intronic	UGT2B10
4	69682471	rs294777	A	G	1.2244	0.1905	0.0128	5.53e-48
4	69604490	rs115472926	T	C	1.0496	-0.0782	0.0054	8.82e-46	intergenic	UGT2B15, UGT2B10
4	69605178	chr4:69605178:I	G	GT	1.0422	-0.0772	0.0054	4.16e-45	intergenic	UGT2B15, UGT2B10
4	69689633	rs114850007	A	T	1.2008	0.1882	0.0131	5.24e-45	intronic	UGT2B10
4	69644798	rs115860183	G	A	0.9725	-0.145	0.0101	5.94e-45	intergenic	UGT2B15, UGT2B10
4	69672645	rs116684908	A	G	1.2425	0.1795	0.0125	6.72e-45	intergenic	UGT2B15, UGT2B10
4	69689001	rs149606678	A	G	1.1795	0.1869	0.0131	2.09e-44	intronic	UGT2B10
4	69665571	rs115859082	A	C	1.1959	0.1838	0.013	1.3e-43	intergenic	UGT2B15, UGT2B10
4	69614042	rs111448156	C	T	1.0592	-0.0751	0.0053	2.35e-43	intergenic	UGT2B15, UGT2B10
4	69657695	rs116715804	T	C	1.1995	-0.1826	0.0129	2.55e-43	intergenic	UGT2B15, UGT2B10
4	69610450	rs113645682	G	A	1.0564	-0.0753	0.0053	2.8e-43	intergenic	UGT2B15, UGT2B10
4	69619429	rs113865757	C	T	1.2408	-0.1753	0.0125	3.59e-43	intergenic	UGT2B15, UGT2B10
4	69615314	rs115155294	C	T	1.0637	-0.0745	0.0053	3.64e-43	intergenic	UGT2B15, UGT2B10
4	69627436	rs113364384	A	G	1.0648	-0.0745	0.0053	3.65e-43	intergenic	UGT2B15, UGT2B10
4	69627254	rs114475271	T	A	1.0648	-0.0745	0.0053	3.67e-43	intergenic	UGT2B15, UGT2B10
4	69627258	rs79310544	T	C	1.0648	-0.0745	0.0053	3.67e-43	intergenic	UGT2B15, UGT2B10
4	69626404	rs1828705	C	A	1.0656	-0.0744	0.0053	4.88e-43
4	69626037	rs116353550	A	G	1.0639	-0.0744	0.0053	4.99e-43	intergenic	UGT2B15, UGT2B10
4	69626319	rs115176266	A	G	1.0655	-0.0744	0.0053	5.03e-43	intergenic	UGT2B15, UGT2B10
4	69614025	rs113041224	A	G	1.0621	-0.0745	0.0053	5.2e-43	intergenic	UGT2B15, UGT2B10
4	69625730	rs115130067	G	A	1.0652	-0.0743	0.0053	6e-43	intergenic	UGT2B15, UGT2B10
4	69652787	rs116531272	G	A	1.2009	-0.1817	0.0129	6.49e-43	intergenic	UGT2B15, UGT2B10
4	69624846	rs115100680	C	T	1.0636	-0.0743	0.0053	6.93e-43	intergenic	UGT2B15, UGT2B10
4	69619813	rs111254231	G	A	1.0642	-0.0742	0.0053	7.5e-43	intergenic	UGT2B15, UGT2B10
4	69614059	rs113351212	T	A	1.0632	-0.0743	0.0053	7.79e-43	intergenic	UGT2B15, UGT2B10
4	69624820	rs113247582	A	G	1.0649	-0.0742	0.0053	8.22e-43	intergenic	UGT2B15, UGT2B10
4	69624757	rs112374626	G	A	1.0649	-0.0742	0.0053	8.38e-43	intergenic	UGT2B15, UGT2B10
4	69652756	rs186116289	T	C	0.9704	-0.1427	0.0102	8.41e-43	intergenic	UGT2B15, UGT2B10
4	69624755	rs111689490	T	C	1.0648	-0.0742	0.0053	8.53e-43	intergenic	UGT2B15, UGT2B10
4	69645069	rs113999949	G	A	0.9726	-0.1424	0.0102	8.72e-43	intergenic	UGT2B15, UGT2B10
4	69645553	rs116248512	G	A	0.9726	-0.1424	0.0102	8.72e-43	intergenic	UGT2B15, UGT2B10
4	69624642	rs115020720	A	G	1.0648	-0.0741	0.0053	8.86e-43	intergenic	UGT2B15, UGT2B10
4	69650293	rs115858476	T	C	0.9714	-0.1425	0.0102	9.01e-43	intergenic	UGT2B15, UGT2B10
4	69654408	rs116149014	A	G	0.97	-0.1427	0.0102	9.16e-43	intergenic	UGT2B15, UGT2B10
4	69651787	chr4:69651787:D	GA	G	0.9711	-0.1425	0.0102	9.5e-43
4	69652573	rs114874870	G	A	0.9711	-0.1425	0.0102	9.61e-43	intergenic	UGT2B15, UGT2B10
4	69653514	rs114615110	G	A	0.971	-0.1425	0.0102	9.88e-43	intergenic	UGT2B15, UGT2B10
4	69613882	rs112599474	C	T	1.0656	-0.0741	0.0053	9.95e-43	intergenic	UGT2B15, UGT2B10
4	69613972	rs112153034	T	A	1.0656	-0.0741	0.0053	9.95e-43	intergenic	UGT2B15, UGT2B10
4	69614431	rs116649821	C	T	1.0656	-0.0741	0.0053	9.95e-43	intergenic	UGT2B15, UGT2B10
4	69614542	rs148060416	C	T	1.0656	-0.0741	0.0053	9.95e-43	intergenic	UGT2B15, UGT2B10
4	69614973	rs115133351	T	G	1.0656	-0.0741	0.0053	9.95e-43	intergenic	UGT2B15, UGT2B10
4	69615068	rs115851158	A	G	1.0656	-0.0741	0.0053	9.95e-43	intergenic	UGT2B15, UGT2B10
4	69615138	rs114048682	G	A	1.0656	-0.0741	0.0053	9.95e-43	intergenic	UGT2B15, UGT2B10
4	69615660	rs115868753	T	C	1.0656	-0.0741	0.0053	9.95e-43	intergenic	UGT2B15, UGT2B10
4	69615741	rs115548723	T	C	1.0656	-0.0741	0.0053	9.95e-43	intergenic	UGT2B15, UGT2B10
4	69615767	rs115419613	C	A	1.0656	-0.0741	0.0053	9.95e-43	intergenic	UGT2B15, UGT2B10
4	69615849	rs114383883	C	T	1.0656	-0.0741	0.0053	9.95e-43	intergenic	UGT2B15, UGT2B10
4	69616140	rs116558634	G	A	1.0656	-0.0741	0.0053	9.95e-43	intergenic	UGT2B15, UGT2B10
4	69616336	rs116525660	G	A	1.0656	-0.0741	0.0053	9.95e-43	intergenic	UGT2B15, UGT2B10
4	69616437	rs116363094	T	C	1.0656	-0.0741	0.0053	9.95e-43	intergenic	UGT2B15, UGT2B10
4	69616575	rs389715	G	A	1.0656	-0.0741	0.0053	9.95e-43
4	69618237	rs115009294	G	A	1.0653	-0.0741	0.0053	9.97e-43	intergenic	UGT2B15, UGT2B10
4	69618420	rs115317383	A	C	1.0653	-0.0741	0.0053	9.98e-43	intergenic	UGT2B15, UGT2B10
4	69618644	rs149773789	G	A	1.0653	-0.0741	0.0053	9.99e-43	intergenic	UGT2B15, UGT2B10
4	69619078	rs115414681	C	G	1.0652	-0.0741	0.0053	1e-42	intergenic	UGT2B15, UGT2B10
4	69619275	rs114676038	C	G	1.0652	-0.0741	0.0053	1e-42	intergenic	UGT2B15, UGT2B10
4	69619315	rs116549414	T	C	1.0652	-0.0741	0.0053	1e-42	intergenic	UGT2B15, UGT2B10
4	69619339	rs115738802	G	A	1.0652	-0.0741	0.0053	1e-42	intergenic	UGT2B15, UGT2B10
4	69619688	rs111774338	A	C	1.0651	-0.0741	0.0053	1.01e-42	intergenic	UGT2B15, UGT2B10
4	69619917	rs115108742	C	T	1.0651	-0.0741	0.0053	1.01e-42	intergenic	UGT2B15, UGT2B10
4	69620401	rs115229303	A	G	1.0651	-0.0741	0.0053	1.01e-42	intergenic	UGT2B15, UGT2B10
4	69624312	rs115822916	A	G	1.0648	-0.0741	0.0053	1.01e-42	intergenic	UGT2B15, UGT2B10
4	69621227	rs115859359	T	A	1.065	-0.0741	0.0053	1.02e-42	intergenic	UGT2B15, UGT2B10
4	69621380	rs116051919	T	G	1.065	-0.0741	0.0053	1.02e-42	intergenic	UGT2B15, UGT2B10
4	69621445	rs114383090	A	G	1.065	-0.0741	0.0053	1.02e-42	intergenic	UGT2B15, UGT2B10
4	69621964	rs116620928	C	G	1.0649	-0.0741	0.0053	1.03e-42	intergenic	UGT2B15, UGT2B10
4	69621981	rs116003235	A	T	1.0649	-0.0741	0.0053	1.03e-42	intergenic	UGT2B15, UGT2B10
4	69622218	rs116313770	G	C	1.0649	-0.0741	0.0053	1.03e-42	intergenic	UGT2B15, UGT2B10
4	69622531	rs115172690	T	G	1.0649	-0.0741	0.0053	1.04e-42	intergenic	UGT2B15, UGT2B10
4	69622658	rs114168134	T	C	1.0649	-0.0741	0.0053	1.04e-42	intergenic	UGT2B15, UGT2B10
4	69620606	rs114373343	A	T	1.0646	-0.0741	0.0053	1.05e-42	intergenic	UGT2B15, UGT2B10
4	69609576	rs115197162	A	T	1.0654	-0.0736	0.0053	1.06e-42	intergenic	UGT2B15, UGT2B10
4	69623976	rs114121284	G	C	1.0649	-0.0741	0.0053	1.06e-42	intergenic	UGT2B15, UGT2B10
4	69655714	rs115235503	C	T	0.9703	-0.1425	0.0102	1.12e-42	intergenic	UGT2B15, UGT2B10
4	69621938	rs114999894	G	C	1.0641	-0.0741	0.0053	1.17e-42	intergenic	UGT2B15, UGT2B10
4	69657899	rs115377518	C	T	0.9701	-0.1425	0.0102	1.24e-42	intergenic	UGT2B15, UGT2B10
4	69642142	rs114576382	C	T	0.9748	-0.142	0.0102	1.32e-42	intergenic	UGT2B15, UGT2B10
4	69652757	chr4:69652757:D	GT	G	0.9691	-0.142	0.0102	1.46e-42
4	69660303	rs114136864	C	T	0.97	-0.1423	0.0102	1.6e-42	intergenic	UGT2B15, UGT2B10
4	69651890	rs114317895	A	G	0.9311	-0.1414	0.0101	1.61e-42	intergenic	UGT2B15, UGT2B10
4	69660834	rs115801223	G	C	0.97	-0.1423	0.0102	1.63e-42	intergenic	UGT2B15, UGT2B10
4	69663547	rs116317320	C	T	0.97	-0.1422	0.0102	2.08e-42	intergenic	UGT2B15, UGT2B10
4	69605182	chr4:69605182:I	T	TC	1.0697	-0.0734	0.0053	2.49e-42	intergenic	UGT2B15, UGT2B10
4	69668510	rs116612687	T	C	0.9703	-0.142	0.0102	2.88e-42	intergenic	UGT2B15, UGT2B10
4	69664536	rs142124595	G	T	0.9679	-0.1418	0.0102	3.74e-42	intergenic	UGT2B15, UGT2B10
4	69623496	rs116710191	A	G	1.0573	-0.0738	0.0053	4.12e-42	intergenic	UGT2B15, UGT2B10
4	69614282	rs116155553	G	A	1.0585	-0.0739	0.0053	4.67e-42	intergenic	UGT2B15, UGT2B10
4	69612257	chr4:69612257:D	AC	A	1.0608	-0.0736	0.0053	5.15e-42
4	69667714	rs114972368	C	G	0.9699	-0.1415	0.0102	5.15e-42	intergenic	UGT2B15, UGT2B10
4	69607021	rs115577600	A	G	0.9801	-0.163	0.0118	5.91e-42	intergenic	UGT2B15, UGT2B10
4	69606897	rs114276393	G	T	0.98	-0.163	0.0118	5.93e-42	intergenic	UGT2B15, UGT2B10
4	69614293	rs114413515	C	T	0.9816	-0.1629	0.0118	6.02e-42	intergenic	UGT2B15, UGT2B10
4	69607610	rs115620203	A	T	0.9802	-0.163	0.0118	6.16e-42	intergenic	UGT2B15, UGT2B10
4	69613227	rs114108676	T	A	0.9813	-0.1629	0.0118	6.2e-42	intergenic	UGT2B15, UGT2B10
4	69617561	rs116181568	T	A	0.9823	-0.1628	0.0118	6.2e-42	intergenic	UGT2B15, UGT2B10
4	69612658	rs114722783	G	A	0.9811	-0.1629	0.0118	6.22e-42	intergenic	UGT2B15, UGT2B10
4	69612963	rs116429127	T	A	0.9811	-0.1629	0.0118	6.22e-42	intergenic	UGT2B15, UGT2B10
4	69623839	chr4:69623839:D	TC	T	0.9835	-0.1627	0.0117	6.28e-42
4	69625413	rs116829614	G	C	0.9835	-0.1627	0.0117	6.28e-42	intergenic	UGT2B15, UGT2B10
4	69625414	rs11731269	G	A	0.9835	-0.1627	0.0117	6.28e-42
4	69616791	rs115568501	G	A	0.9821	-0.1628	0.0118	6.3e-42	intergenic	UGT2B15, UGT2B10
4	69636752	rs146423074	C	T	0.9745	-0.1412	0.0102	6.41e-42	intergenic	UGT2B15, UGT2B10
4	69637006	rs143713409	C	A	0.9745	-0.1412	0.0102	6.41e-42	intergenic	UGT2B15, UGT2B10
4	69612556	rs139454689	T	C	0.9807	-0.1629	0.0118	6.46e-42	intergenic	UGT2B15, UGT2B10
4	69612648	rs115863825	A	G	1.0649	-0.0732	0.0053	6.95e-42	intergenic	UGT2B15, UGT2B10
4	69612153	rs113318835	T	C	1.0651	-0.0732	0.0053	7.1e-42	intergenic	UGT2B15, UGT2B10
4	69612207	rs112778759	C	T	1.0651	-0.0732	0.0053	7.1e-42	intergenic	UGT2B15, UGT2B10
4	69612303	rs111805391	A	G	1.0651	-0.0732	0.0053	7.1e-42	intergenic	UGT2B15, UGT2B10
4	69632988	rs116559190	C	T	0.9743	-0.1411	0.0102	7.17e-42	intergenic	UGT2B15, UGT2B10
4	69612763	rs114093294	A	G	1.0651	-0.0732	0.0053	7.2e-42	intergenic	UGT2B15, UGT2B10
4	69611505	rs397678	C	T	1.0654	-0.0731	0.0053	7.5e-42
4	69611769	rs116390686	G	A	1.0654	-0.0731	0.0053	7.5e-42	intergenic	UGT2B15, UGT2B10
4	69613030	rs403552	T	C	1.0654	-0.0731	0.0053	7.5e-42
4	69605393	rs76209928	C	A	1.0637	-0.0731	0.0053	7.55e-42	intergenic	UGT2B15, UGT2B10
4	69605412	rs79620874	T	C	1.0637	-0.0731	0.0053	7.56e-42	intergenic	UGT2B15, UGT2B10
4	69604936	rs114245252	T	C	1.0666	-0.0731	0.0053	7.58e-42	intergenic	UGT2B15, UGT2B10
4	69611220	rs76203808	C	T	1.0654	-0.0731	0.0053	7.69e-42	intergenic	UGT2B15, UGT2B10
4	69611223	rs112784694	A	G	1.0654	-0.0731	0.0053	7.69e-42	intergenic	UGT2B15, UGT2B10
4	69625622	rs142945327	T	C	1.0596	-0.0736	0.0053	8.42e-42	intergenic	UGT2B15, UGT2B10
4	69625628	rs151089786	C	G	1.0596	-0.0736	0.0053	8.42e-42	intergenic	UGT2B15, UGT2B10
4	69631870	rs115225050	C	T	0.9729	-0.1409	0.0102	8.43e-42	intergenic	UGT2B15, UGT2B10
4	69630961	rs117386657	A	G	0.9609	-0.1428	0.0103	8.53e-42	intergenic	UGT2B15, UGT2B10
4	69609924	rs112239062	T	A	1.0659	-0.073	0.0053	8.76e-42	intergenic	UGT2B15, UGT2B10
4	69610704	rs114612059	G	A	1.0657	-0.073	0.0053	8.77e-42	intergenic	UGT2B15, UGT2B10
4	69610400	rs111653666	T	C	1.0657	-0.073	0.0053	8.85e-42	intergenic	UGT2B15, UGT2B10
4	69610430	rs111801105	G	A	1.0657	-0.073	0.0053	8.85e-42	intergenic	UGT2B15, UGT2B10
4	69610330	rs112767787	G	A	1.0659	-0.073	0.0053	9.09e-42	intergenic	UGT2B15, UGT2B10
4	69610213	rs112236434	C	G	1.0659	-0.073	0.0053	9.17e-42	intergenic	UGT2B15, UGT2B10
4	69610233	rs112500932	T	A	1.0659	-0.073	0.0053	9.17e-42	intergenic	UGT2B15, UGT2B10
4	69610257	rs113768419	C	T	1.0659	-0.073	0.0053	9.17e-42	intergenic	UGT2B15, UGT2B10
4	69610184	rs112243689	G	A	1.0659	-0.073	0.0053	9.26e-42	intergenic	UGT2B15, UGT2B10
4	69610192	rs112779873	A	G	1.0659	-0.073	0.0053	9.26e-42	intergenic	UGT2B15, UGT2B10
4	69625505	rs116206615	G	C	1.0599	-0.0736	0.0053	9.26e-42	intergenic	UGT2B15, UGT2B10
4	69611166	chr4:69611166:D	GT	G	1.0623	-0.0731	0.0053	9.29e-42
4	69610128	rs111709250	G	A	1.066	-0.073	0.0053	9.34e-42	intergenic	UGT2B15, UGT2B10
4	69610004	rs113318925	T	C	1.066	-0.073	0.0053	9.42e-42	intergenic	UGT2B15, UGT2B10
4	69610466	rs112406160	A	G	1.062	-0.0732	0.0053	9.65e-42	intergenic	UGT2B15, UGT2B10
4	69609824	rs112130018	C	T	1.0661	-0.073	0.0053	9.69e-42	intergenic	UGT2B15, UGT2B10
4	69609763	rs114231966	C	T	1.0661	-0.073	0.0053	9.78e-42	intergenic	UGT2B15, UGT2B10
4	69603602	rs115474343	A	G	0.9783	-0.1628	0.0118	1.08e-41	intergenic	UGT2B15, UGT2B10
4	69609194	chr4:69609194:I	T	TCATA	1.0659	-0.073	0.0053	1.09e-41	intergenic	UGT2B15, UGT2B10
4	69606437	rs116691296	T	C	1.0666	-0.0729	0.0053	1.12e-41	intergenic	UGT2B15, UGT2B10
4	69606585	rs116552440	A	T	1.0666	-0.0729	0.0053	1.12e-41	intergenic	UGT2B15, UGT2B10
4	69606729	rs114244020	A	C	1.0666	-0.0729	0.0053	1.12e-41	intergenic	UGT2B15, UGT2B10
4	69606943	rs407182	G	A	1.0667	-0.0729	0.0053	1.12e-41
4	69607303	rs116493381	G	T	1.0666	-0.0729	0.0053	1.12e-41	intergenic	UGT2B15, UGT2B10
4	69607852	chr4:69607852:I	C	CT	1.0666	-0.0729	0.0053	1.12e-41	intergenic	UGT2B15, UGT2B10
4	69607856	chr4:69607856:I	C	CA	1.0666	-0.0729	0.0053	1.12e-41	intergenic	UGT2B15, UGT2B10
4	69607874	rs112132722	C	T	1.0666	-0.0729	0.0053	1.12e-41	intergenic	UGT2B15, UGT2B10
4	69608007	rs115498491	T	C	1.0666	-0.0729	0.0053	1.12e-41	intergenic	UGT2B15, UGT2B10
4	69608033	rs115555315	G	C	1.0666	-0.0729	0.0053	1.12e-41	intergenic	UGT2B15, UGT2B10
4	69608887	rs380168	G	A	1.0667	-0.0729	0.0053	1.12e-41
4	69612531	rs138596472	C	T	1.0597	-0.0731	0.0053	1.27e-41	intergenic	UGT2B15, UGT2B10
4	69605066	rs116802075	A	G	1.0643	-0.0729	0.0053	1.33e-41	intergenic	UGT2B15, UGT2B10
4	69670073	rs138998181	C	T	1.0606	0.0848	0.0062	2.47e-41	intergenic	UGT2B15, UGT2B10
4	69612475	rs145954698	T	C	1.0611	-0.0726	0.0053	3.36e-41	intergenic	UGT2B15, UGT2B10
4	69671302	rs11737672	T	C	0.9742	-0.1629	0.0119	5.57e-41
4	69670886	rs114639233	T	C	0.9725	-0.1623	0.0119	7.5e-41	intergenic	UGT2B15, UGT2B10
4	69609990	rs111572083	T	A	1.0622	-0.0723	0.0053	1.04e-40	intergenic	UGT2B15, UGT2B10
4	69628582	chr4:69628582:I	T	TAGGG	1.0296	-0.0692	0.0051	1.06e-40	intergenic	UGT2B15, UGT2B10
4	69611272	rs116053942	G	A	0.9636	-0.1394	0.0102	1.28e-40	intergenic	UGT2B15, UGT2B10
4	69619529	chr4:69619529:D	AC	A	0.9532	-0.1589	0.0117	1.34e-40
4	69672251	rs114730872	A	G	0.9693	-0.1617	0.0119	1.35e-40	intergenic	UGT2B15, UGT2B10
4	69641776	rs115120773	C	T	0.9623	-0.139	0.0102	1.44e-40	intergenic	UGT2B15, UGT2B10
4	69613687	chr4:69613687:I	A	ACTTT	1.0562	-0.0722	0.0053	1.57e-40	intergenic	UGT2B15, UGT2B10
4	69618019	rs116458816	A	T	0.9706	-0.1392	0.0102	1.62e-40	intergenic	UGT2B15, UGT2B10
4	69619748	rs115684409	A	G	0.971	-0.1391	0.0102	1.64e-40	intergenic	UGT2B15, UGT2B10
4	69614031	rs116051501	A	C	0.9701	-0.1392	0.0102	1.69e-40	intergenic	UGT2B15, UGT2B10
4	69621267	rs116218628	G	A	0.9668	-0.1396	0.0103	2.01e-40	intergenic	UGT2B15, UGT2B10
4	69670995	chr4:69670995:I	T	TGCTCCCA	0.9654	-0.1637	0.0121	2.13e-40	intergenic	UGT2B15, UGT2B10
4	69672745	rs116339858	C	T	0.9668	-0.1615	0.0119	2.35e-40	intergenic	UGT2B15, UGT2B10
4	69673875	chr4:69673875:I	G	GC	1.1797	0.1761	0.013	2.72e-40	intergenic	UGT2B15, UGT2B10
4	69606002	rs146906095	C	T	1.0604	-0.0718	0.0053	3.07e-40	intergenic	UGT2B15, UGT2B10
4	69607530	chr4:69607530:D	AC	A	0.921	-0.1493	0.011	3.89e-40
4	69623072	rs115088032	T	C	1.0594	-0.0721	0.0053	5.35e-40	intergenic	UGT2B15, UGT2B10
4	69641777	rs115804752	A	G	0.962	-0.1379	0.0102	5.66e-40	intergenic	UGT2B15, UGT2B10
4	69670179	rs115442155	A	G	1.0103	0.0836	0.0062	5.75e-40	intergenic	UGT2B15, UGT2B10
4	69729815	rs116445309	T	A	0.9928	-0.1452	0.0108	8.49e-40	intergenic	UGT2B10, UGT2A3
4	69675084	rs115038978	G	C	0.9651	-0.1596	0.0119	9.17e-40	intergenic	UGT2B15, UGT2B10
4	69658159	rs114909970	G	A	1.0466	-0.0677	0.005	9.63e-40	intergenic	UGT2B15, UGT2B10
4	69675326	rs114521961	C	G	0.9652	-0.1594	0.0119	1.11e-39	intergenic	UGT2B15, UGT2B10
4	69675510	rs115163082	C	G	0.9649	-0.1594	0.0119	1.11e-39	intergenic	UGT2B15, UGT2B10
4	69670461	rs116777851	A	G	0.9734	-0.146	0.0109	1.3e-39	intergenic	UGT2B15, UGT2B10
4	69674156	rs114745540	G	A	0.9757	-0.1458	0.0109	1.96e-39	intergenic	UGT2B15, UGT2B10
4	69668714	rs115991625	C	T	0.9687	-0.1446	0.0108	2.21e-39	intergenic	UGT2B15, UGT2B10
4	69677759	rs115232947	G	A	0.9653	-0.1585	0.0118	2.22e-39	intergenic	UGT2B15, UGT2B10
4	69678128	rs115796823	C	G	0.9655	-0.1584	0.0118	2.51e-39	intergenic	UGT2B15, UGT2B10
4	69680942	rs116625312	A	T	0.9547	-0.1607	0.012	2.75e-39	upstream	UGT2B10
4	69669667	rs114318985	C	T	0.971	-0.1443	0.0108	3.28e-39	intergenic	UGT2B15, UGT2B10
4	69605864	chr4:69605864:D	AT	A	1.0158	-0.0722	0.0054	3.62e-39
4	69677670	rs115650060	A	C	0.9717	-0.1457	0.0109	3.66e-39	intergenic	UGT2B15, UGT2B10
4	69612344	rs137960876	C	T	0.9614	-0.1509	0.0113	4.17e-39	intergenic	UGT2B15, UGT2B10
4	69644013	rs114057492	T	C	1.0505	-0.067	0.005	4.44e-39	intergenic	UGT2B15, UGT2B10
4	69641171	chr4:69641171:D	GTC	G	0.9685	-0.1376	0.0103	4.5e-39
4	69679748	rs141926198	G	A	0.9671	-0.1572	0.0118	5.73e-39	intergenic	UGT2B15, UGT2B10
4	69678943	rs116511001	G	T	0.9628	-0.1574	0.0118	6.05e-39	intergenic	UGT2B15, UGT2B10
4	69640690	rs114520833	G	T	1.0508	-0.0667	0.005	7.83e-39	intergenic	UGT2B15, UGT2B10
4	69767349	rs116446865	T	C	0.9662	-0.1522	0.0115	8.39e-39	intergenic	UGT2B10, UGT2A3
4	69629211	rs115316647	T	C	1.0496	-0.0667	0.005	9.58e-39	intergenic	UGT2B15, UGT2B10
4	69678764	rs114375522	T	A	0.964	-0.1567	0.0118	1.02e-38	intergenic	UGT2B15, UGT2B10
4	69627831	rs111413070	T	C	1.0472	-0.0667	0.005	1.07e-38	intergenic	UGT2B15, UGT2B10
4	69669268	rs151231285	C	T	0.9746	-0.1626	0.0123	1.11e-38	intergenic	UGT2B15, UGT2B10
4	69753685	rs115815311	G	A	0.9874	-0.1428	0.0108	1.27e-38	intergenic	UGT2B10, UGT2A3
4	69755206	rs116379644	A	C	0.9874	-0.1428	0.0108	1.27e-38	intergenic	UGT2B10, UGT2A3
4	69627660	rs113449450	A	T	1.0504	-0.0666	0.005	1.28e-38	intergenic	UGT2B15, UGT2B10
4	69627845	rs113392814	A	G	1.0504	-0.0666	0.005	1.28e-38	intergenic	UGT2B15, UGT2B10
4	69628054	rs116819698	C	A	1.0504	-0.0666	0.005	1.28e-38	intergenic	UGT2B15, UGT2B10
4	69628110	rs114398911	G	A	1.0504	-0.0666	0.005	1.28e-38	intergenic	UGT2B15, UGT2B10
4	69628948	rs114190049	C	T	1.0506	-0.0666	0.005	1.28e-38	intergenic	UGT2B15, UGT2B10
4	69628956	rs114745479	T	C	1.0506	-0.0666	0.005	1.28e-38	intergenic	UGT2B15, UGT2B10
4	69629290	rs114255902	C	T	1.0506	-0.0666	0.005	1.28e-38	intergenic	UGT2B15, UGT2B10
4	69629815	rs115748940	A	G	1.0506	-0.0666	0.005	1.28e-38	intergenic	UGT2B15, UGT2B10
4	69630554	rs1513556	A	G	1.0506	-0.0666	0.005	1.28e-38
4	69630843	rs7677944	A	C	1.0506	-0.0666	0.005	1.28e-38
4	69648290	chr4:69648290:I	T	TC	0.9269	-0.1363	0.0103	1.44e-38	intergenic	UGT2B15, UGT2B10
4	69680943	rs114097237	A	T	0.9473	-0.1591	0.012	1.46e-38	upstream	UGT2B10
4	69612240	rs112415286	C	T	1.0549	-0.0704	0.0053	1.58e-38	intergenic	UGT2B15, UGT2B10
4	69673877	chr4:69673877:I	C	CT	1.1847	0.1748	0.0132	1.68e-38	intergenic	UGT2B15, UGT2B10
4	69688962	rs141925749	G	A	0.965	-0.1429	0.0108	1.69e-38	intronic	UGT2B10
4	69602534	rs115119311	T	C	1.0596	-0.0693	0.0052	1.95e-38	intergenic	UGT2B15, UGT2B10
4	69630029	rs116112729	A	G	1.0505	-0.0664	0.005	2.15e-38	intergenic	UGT2B15, UGT2B10
4	69681848	rs138956169	T	C	0.9687	-0.1547	0.0117	2.55e-38	synonymous	UGT2B10
4	69681936	rs144647471	G	T	0.9687	-0.1547	0.0117	2.55e-38	nonsynonymous missense	UGT2B10
4	69682509	rs114874096	A	G	0.9688	-0.1546	0.0117	2.66e-38	intronic	UGT2B10
4	69669603	rs114754935	C	A	0.9952	-0.1372	0.0104	3.4e-38	intergenic	UGT2B15, UGT2B10
4	69606191	rs114330086	T	A	1.01	-0.0706	0.0054	4.55e-38	intergenic	UGT2B15, UGT2B10
4	69687214	rs116007193	T	C	0.9605	-0.1554	0.0118	4.85e-38	intronic	UGT2B10
4	69682690	rs150713743	A	G	0.9692	-0.1544	0.0118	5.2e-38	intronic	UGT2B10
4	69684923	rs140646937	T	C	0.9692	-0.1544	0.0118	5.26e-38	intronic	UGT2B10
4	69641175	chr4:69641175:D	CTG	C	0.9643	-0.1354	0.0103	6.26e-38
4	69683636	rs114993422	G	A	0.9678	-0.1541	0.0118	7.05e-38	intronic	UGT2B10
4	69653964	rs114813628	G	A	0.9688	-0.141	0.0108	7.44e-38	intergenic	UGT2B15, UGT2B10
4	69654415	rs115227509	T	A	0.9689	-0.141	0.0108	7.58e-38	intergenic	UGT2B15, UGT2B10
4	69658127	rs115987715	G	C	0.9688	-0.141	0.0108	8.73e-38	intergenic	UGT2B15, UGT2B10
4	69638590	rs147799377	A	C	1.0419	-0.0661	0.005	8.95e-38	intergenic	UGT2B15, UGT2B10
4	69685752	rs115258821	A	C	0.9665	-0.1536	0.0118	1.11e-37	intronic	UGT2B10
4	69682795	rs116533103	G	A	0.9675	-0.1521	0.0116	1.13e-37	intronic	UGT2B10
4	69686381	rs116031106	G	A	0.9666	-0.1536	0.0117	1.16e-37	intronic	UGT2B10
4	69686676	rs115759958	A	G	0.9665	-0.1536	0.0118	1.19e-37	intronic	UGT2B10
4	69686975	rs114714824	T	C	0.9663	-0.1536	0.0118	1.22e-37	intronic	UGT2B10
4	69687619	rs144238031	C	T	0.966	-0.1536	0.0118	1.25e-37	intronic	UGT2B10
4	69688125	rs146889061	G	T	0.965	-0.1537	0.0118	1.37e-37	intronic	UGT2B10
4	69639094	rs117079590	C	T	0.9711	-0.1403	0.0108	1.88e-37	intergenic	UGT2B15, UGT2B10
4	69672068	rs115480801	G	A	0.9485	-0.1612	0.0124	1.9e-37	intergenic	UGT2B15, UGT2B10
4	69735957	rs150405933	C	T	0.9649	-0.1516	0.0116	2.38e-37	intergenic	UGT2B10, UGT2A3
4	69659773	rs116135845	A	G	0.9772	-0.1607	0.0124	3.16e-37	intergenic	UGT2B15, UGT2B10
4	69668520	rs115968327	G	A	0.9776	-0.1605	0.0124	3.19e-37	intergenic	UGT2B15, UGT2B10
4	69669990	rs116164018	C	G	0.9782	-0.1603	0.0123	3.3e-37	intergenic	UGT2B15, UGT2B10
4	69642982	rs115363606	C	T	0.9784	-0.1606	0.0124	3.36e-37	intergenic	UGT2B15, UGT2B10
4	69654056	rs115920747	C	A	0.9778	-0.1607	0.0124	3.38e-37	intergenic	UGT2B15, UGT2B10
4	69643921	rs114636474	G	A	0.9785	-0.1606	0.0124	3.39e-37	intergenic	UGT2B15, UGT2B10
4	69649509	rs116134381	C	A	0.9787	-0.1606	0.0124	3.57e-37	intergenic	UGT2B15, UGT2B10
4	69652560	rs115250354	G	T	0.9782	-0.1606	0.0124	3.6e-37	intergenic	UGT2B15, UGT2B10
4	69639160	rs115292483	C	T	0.9779	-0.1603	0.0124	3.62e-37	intergenic	UGT2B15, UGT2B10
4	69637632	rs143331934	T	C	0.978	-0.1603	0.0124	3.66e-37	intergenic	UGT2B15, UGT2B10
4	69622812	rs115749265	C	A	0.9787	-0.1602	0.0123	3.75e-37	intergenic	UGT2B15, UGT2B10
4	69621010	rs116134160	C	T	0.9786	-0.1602	0.0123	3.79e-37	intergenic	UGT2B15, UGT2B10
4	69634240	rs145469425	C	T	0.9784	-0.1602	0.0123	3.84e-37	intergenic	UGT2B15, UGT2B10
4	69629705	rs114369716	T	A	0.9785	-0.1601	0.0123	3.89e-37	intergenic	UGT2B15, UGT2B10
4	69631428	rs115703809	G	A	0.9785	-0.1601	0.0123	3.89e-37	intergenic	UGT2B15, UGT2B10
4	69632394	rs116592574	C	T	0.9785	-0.1601	0.0123	3.89e-37	intergenic	UGT2B15, UGT2B10
4	69619452	rs112010479	G	A	0.9784	-0.1601	0.0123	3.93e-37	intergenic	UGT2B15, UGT2B10
4	69612332	rs113821880	C	T	0.9776	-0.1601	0.0124	4.07e-37	intergenic	UGT2B15, UGT2B10
4	69612801	rs116764105	G	A	0.9776	-0.1601	0.0124	4.07e-37	intergenic	UGT2B15, UGT2B10
4	69613181	rs116108091	T	G	0.9776	-0.1601	0.0124	4.07e-37	intergenic	UGT2B15, UGT2B10
4	69614157	rs112831907	G	A	0.9777	-0.1601	0.0124	4.17e-37	intergenic	UGT2B15, UGT2B10
4	69610144	rs113042441	T	C	0.9774	-0.1601	0.0124	4.22e-37	intergenic	UGT2B15, UGT2B10
4	69609345	rs114526018	G	T	0.9771	-0.1601	0.0124	4.55e-37	intergenic	UGT2B15, UGT2B10
4	69607124	rs115116836	G	A	0.9769	-0.1601	0.0124	4.58e-37	intergenic	UGT2B15, UGT2B10
4	69672126	rs144102461	T	A	0.941	-0.1616	0.0125	5.03e-37	intergenic	UGT2B15, UGT2B10
4	69650840	chr4:69650840:D	ATAAT	A	0.9595	-0.1641	0.0127	5.18e-37
4	69681619	rs140431502	C	T	0.9359	-0.1491	0.0115	7.07e-37	upstream	UGT2B10
4	69759101	rs116380956	A	G	0.9834	-0.1386	0.0107	8.15e-37	intergenic	UGT2B10, UGT2A3
4	69650838	chr4:69650838:D	CAAT	C	0.9659	-0.1623	0.0126	9.92e-37
4	69611639	chr4:69611639:I	G	GT	0.9736	-0.1452	0.0113	1.17e-36	intergenic	UGT2B15, UGT2B10
4	69612123	rs114698644	G	A	0.9736	-0.1452	0.0113	1.17e-36	intergenic	UGT2B15, UGT2B10
4	69717968	rs188560849	C	A	0.9629	-0.1587	0.0123	1.39e-36	intergenic	UGT2B10, UGT2A3
4	69717969	rs192169379	A	T	0.9629	-0.1587	0.0123	1.39e-36	intergenic	UGT2B10, UGT2A3
4	69724935	rs114373813	A	G	0.9629	-0.1587	0.0123	1.39e-36	intergenic	UGT2B10, UGT2A3
4	69628546	rs114086221	C	T	1.0354	-0.0649	0.005	1.48e-36	intergenic	UGT2B15, UGT2B10
4	69625607	rs112493252	C	T	0.9502	-0.1647	0.0128	1.49e-36	intergenic	UGT2B15, UGT2B10
4	69624191	rs115486062	T	C	0.9751	-0.1447	0.0113	1.55e-36	intergenic	UGT2B15, UGT2B10
4	69614000	rs114365974	G	A	0.9749	-0.1447	0.0113	1.63e-36	intergenic	UGT2B15, UGT2B10
4	69634496	rs143605227	A	T	1.0296	-0.0651	0.0051	1.66e-36	intergenic	UGT2B15, UGT2B10
4	69625376	rs2271513	G	A	0.977	-0.1445	0.0113	1.76e-36
4	69636845	rs141145136	T	C	1.0518	-0.0642	0.005	2.4e-36	intergenic	UGT2B15, UGT2B10
4	69769087	rs113996790	C	T	0.9614	-0.1541	0.012	3.01e-36	intergenic	UGT2B10, UGT2A3
4	69749535	chr4:69749535:D	TG	T	0.9551	-0.1576	0.0123	3.1e-36
4	69749537	chr4:69749537:D	TA	T	0.9551	-0.1576	0.0123	3.1e-36
4	69609242	rs116402604	G	A	0.969	-0.1441	0.0113	3.23e-36	intergenic	UGT2B15, UGT2B10
4	69735877	rs113997869	C	T	0.974	-0.1539	0.012	3.29e-36	intergenic	UGT2B10, UGT2A3
4	69605785	rs117723056	T	G	0.968	-0.1441	0.0113	3.32e-36	intergenic	UGT2B15, UGT2B10
4	69607267	rs114473144	T	C	0.9686	-0.1441	0.0113	3.47e-36	intergenic	UGT2B15, UGT2B10
4	69742722	rs115612883	A	G	0.97	-0.1543	0.0121	3.49e-36	intergenic	UGT2B10, UGT2A3
4	69721662	rs115319921	T	C	0.9755	-0.1537	0.012	4.72e-36	intergenic	UGT2B10, UGT2A3
4	69725113	rs115542835	G	T	0.9755	-0.1537	0.012	4.72e-36	intergenic	UGT2B10, UGT2A3
4	69752439	rs115970480	C	T	0.9713	-0.154	0.0121	4.77e-36	intergenic	UGT2B10, UGT2A3
4	69761131	rs114441621	T	C	0.9713	-0.154	0.0121	4.77e-36	intergenic	UGT2B10, UGT2A3
4	69768638	rs116023959	G	T	0.9649	-0.154	0.0121	6.02e-36	intergenic	UGT2B10, UGT2A3
4	69637232	rs140839328	G	A	1.2109	-0.1668	0.0131	6.09e-36	intergenic	UGT2B15, UGT2B10
4	69606254	rs114119885	T	G	0.9682	-0.1439	0.0113	6.86e-36	intergenic	UGT2B15, UGT2B10
4	69640823	chr4:69640823:I	G	GAAAT	0.9942	-0.1165	0.0092	8.73e-36	intergenic	UGT2B15, UGT2B10
4	69765842	chr4:69765842:D	CA	C	0.9577	-0.1543	0.0121	9.58e-36
4	69717641	rs116115181	C	T	0.9725	-0.153	0.012	9.92e-36	intergenic	UGT2B10, UGT2A3
4	69710615	rs115102804	G	T	0.9721	-0.1529	0.012	1.08e-35	intergenic	UGT2B10, UGT2A3
4	69749552	rs139784893	G	A	0.9457	-0.1591	0.0125	1.16e-35	intergenic	UGT2B10, UGT2A3
4	69769999	rs116192600	C	G	0.9603	-0.1527	0.012	1.31e-35	intergenic	UGT2B10, UGT2A3
4	69619618	rs113923277	G	A	0.9559	-0.1559	0.0123	1.56e-35	intergenic	UGT2B15, UGT2B10
4	69662363	rs116831524	A	G	1.0963	0.0636	0.005	1.58e-35	intergenic	UGT2B15, UGT2B10
4	69610765	rs116300560	G	T	0.9655	-0.1445	0.0114	2.24e-35	intergenic	UGT2B15, UGT2B10
4	69692608	rs114001254	A	T	0.9518	-0.1515	0.012	3.33e-35	intronic	UGT2B10
4	69640718	rs115087792	C	G	1.051	-0.0632	0.005	3.7e-35	intergenic	UGT2B15, UGT2B10
4	69740155	rs116018225	C	T	0.965	-0.1504	0.012	4.31e-35	intergenic	UGT2B10, UGT2A3
4	69739411	rs114473265	T	C	0.9662	-0.1502	0.012	5.23e-35	intergenic	UGT2B10, UGT2A3
4	69639244	rs115226152	G	A	1.1003	-0.0631	0.005	5.37e-35	intergenic	UGT2B15, UGT2B10
4	69632909	rs9993883	A	G	1.0508	-0.063	0.005	5.9e-35
4	69698380	rs115763151	G	T	0.9539	-0.1507	0.012	6.04e-35	downstream	UGT2B10
4	69745127	rs115293372	T	C	0.9669	-0.1501	0.012	6.27e-35	intergenic	UGT2B10, UGT2A3
4	69750117	rs116221291	T	C	0.9674	-0.15	0.012	7.01e-35	intergenic	UGT2B10, UGT2A3
4	69629425	rs1513552	G	T	1.1001	-0.063	0.005	7.35e-35
4	69760471	rs114014249	A	G	0.9769	-0.1404	0.0112	7.38e-35	intergenic	UGT2B10, UGT2A3
4	69751951	rs115549616	C	G	0.9677	-0.1499	0.012	7.49e-35	intergenic	UGT2B10, UGT2A3
4	69759351	rs115707640	C	T	0.9678	-0.1499	0.012	7.52e-35	intergenic	UGT2B10, UGT2A3
4	69765782	rs115558925	A	C	0.9654	-0.1499	0.012	7.78e-35	intergenic	UGT2B10, UGT2A3
4	69766993	rs114126014	T	C	0.9635	-0.1499	0.012	8.61e-35	intergenic	UGT2B10, UGT2A3
4	69754283	rs115166258	G	A	0.9757	-0.1402	0.0112	9.47e-35	intergenic	UGT2B10, UGT2A3
4	69639901	rs116777467	A	C	1.0875	-0.0625	0.005	1.07e-34	intergenic	UGT2B15, UGT2B10
4	69630828	rs1513557	A	G	1.09	-0.0624	0.005	1.31e-34
4	69675764	rs114055332	A	C	1.0794	0.0628	0.005	1.58e-34	intergenic	UGT2B15, UGT2B10
4	69634703	rs182432374	T	C	0.9744	-0.1518	0.0122	1.61e-34	intergenic	UGT2B15, UGT2B10
4	69609185	rs114619146	A	G	1.091	-0.0627	0.005	2.38e-34	intergenic	UGT2B15, UGT2B10
4	69607202	rs116711052	G	A	1.0909	-0.0627	0.005	2.44e-34	intergenic	UGT2B15, UGT2B10
4	69707693	rs116011053	C	A	0.9731	-0.1481	0.0119	2.61e-34	intergenic	UGT2B10, UGT2A3
4	69624360	rs116222705	C	T	1.0931	-0.0626	0.005	3.17e-34	intergenic	UGT2B15, UGT2B10
4	69701338	rs11737644	T	C	1.0144	-0.1441	0.0116	3.9e-34
4	69640025	rs116650164	C	T	1.0474	-0.062	0.005	6.6e-34	intergenic	UGT2B15, UGT2B10
4	69647347	rs61750900	T	G	1.1099	0.1311	0.0107	9.82e-34	nonsynonymous missense	UGT2B10
4	69614445	rs114327546	T	A	0.9875	-0.1503	0.0122	1.49e-33	intergenic	UGT2B15, UGT2B10
4	69687676	chr4:69687676:D	AG	A	1.0293	0.0635	0.0052	2.79e-33
4	69684574	rs145194440	C	T	1.0864	0.0616	0.0051	7.29e-33	intronic	UGT2B10
4	69652625	rs116770882	G	C	0.9973	-0.1184	0.0098	1.1e-32	intergenic	UGT2B15, UGT2B10
4	69610748	rs115229558	T	C	0.9791	-0.1499	0.0125	2.19e-32	intergenic	UGT2B15, UGT2B10
4	69621321	chr4:69621321:I	A	AAATGT	1.0395	-0.0651	0.0055	8.02e-32	intergenic	UGT2B15, UGT2B10
4	69635742	rs142720614	A	G	1.0001	-0.0596	0.0051	3.86e-30	intergenic	UGT2B15, UGT2B10
4	69746647	rs114612145	A	G	1.0342	-0.1135	0.01	2.74e-29	intergenic	UGT2B10, UGT2A3
4	69746875	rs116692755	C	G	1.0343	-0.1135	0.01	2.84e-29	intergenic	UGT2B10, UGT2A3
4	69687689	rs115094696	G	T	1.0102	-0.1135	0.01	5.43e-29	intronic	UGT2B10
4	69835367	rs115789793	T	A	1.0537	-0.1047	0.0093	2.18e-28	intergenic	UGT2A3, UGT2B7
4	69695007	rs116471971	A	C	0.9395	-0.1286	0.0117	1.36e-27	intronic	UGT2B10
4	69832066	rs115362306	G	A	1.064	-0.1011	0.0092	1.65e-27	intergenic	UGT2A3, UGT2B7
4	69832734	rs116565506	C	T	1.064	-0.1011	0.0092	1.65e-27	intergenic	UGT2A3, UGT2B7
4	69834939	rs115177560	G	A	1.064	-0.1011	0.0092	1.65e-27	intergenic	UGT2A3, UGT2B7
4	69836622	rs116201744	C	T	1.0636	-0.1011	0.0092	1.86e-27	intergenic	UGT2A3, UGT2B7
4	69827491	rs115081823	A	C	1.0701	-0.1002	0.0092	4.19e-27	intergenic	UGT2A3, UGT2B7
4	69821583	rs114147553	T	C	1.0679	-0.1001	0.0092	4.66e-27	intergenic	UGT2A3, UGT2B7
4	69823747	rs116503688	A	C	1.0699	-0.0998	0.0092	6.62e-27	intergenic	UGT2A3, UGT2B7
4	69720311	rs114529917	A	G	1.0826	0.0614	0.0056	6.8e-27	intergenic	UGT2B10, UGT2A3
4	69840290	rs115974458	T	C	1.0537	-0.0998	0.0092	1.26e-26	intergenic	UGT2A3, UGT2B7
4	69835462	rs115538326	G	A	1.0078	-0.1272	0.0118	1.27e-26	intergenic	UGT2A3, UGT2B7
4	69601886	chr4:69601886:D	TC	T	1.0017	-0.1153	0.0107	1.67e-26
4	69688430	rs114253128	G	A	0.994	-0.1095	0.0102	3.22e-26	intronic	UGT2B10
4	69668395	rs145589934	T	C	0.8401	-0.1487	0.014	7.52e-26	intergenic	UGT2B15, UGT2B10
4	69668396	rs147713091	A	C	0.8401	-0.1487	0.014	7.52e-26	intergenic	UGT2B15, UGT2B10
4	69644905	chr4:69644905:D	GT	G	0.8627	-0.141	0.0133	1.04e-25
4	69668391	rs150896747	G	C	0.8459	-0.1463	0.0138	1.28e-25	intergenic	UGT2B15, UGT2B10
4	69668393	rs139365833	A	T	0.8459	-0.1463	0.0138	1.28e-25	intergenic	UGT2B15, UGT2B10
4	69681244	rs115619871	C	T	0.9754	-0.1067	0.0101	1.34e-25	upstream	UGT2B10
4	69733364	chr4:69733364:I	A	AT	1.0675	0.0548	0.0052	1.59e-25	intergenic	UGT2B10, UGT2A3
4	69676956	rs116585506	T	C	0.9823	-0.1135	0.0107	1.64e-25	intergenic	UGT2B15, UGT2B10
4	69685965	rs114587479	T	C	1.0113	-0.1068	0.0101	2.07e-25	intronic	UGT2B10
4	69703527	rs1379809	G	A	1.079	0.0538	0.0052	1.05e-24
4	69627962	rs148029840	T	C	0.8855	-0.1405	0.0136	1.28e-24	intergenic	UGT2B15, UGT2B10
4	69766119	rs114826126	A	T	1.0303	-0.0954	0.0092	1.48e-24	intergenic	UGT2B10, UGT2A3
4	69739730	rs116605561	A	C	1.0486	-0.0939	0.0091	1.61e-24	intergenic	UGT2B10, UGT2A3
4	69759022	rs115824708	C	A	1.0536	-0.0931	0.009	1.79e-24	intergenic	UGT2B10, UGT2A3
4	69741799	rs116052796	G	T	1.0478	-0.0938	0.0091	1.95e-24	intergenic	UGT2B10, UGT2A3
4	69743225	rs149163214	A	C	1.0477	-0.0938	0.0091	2.03e-24	intergenic	UGT2B10, UGT2A3
4	69593281	rs117751083	T	G	0.8522	-0.1542	0.015	2.51e-24	intergenic	UGT2B15, UGT2B10
4	69755998	rs115069780	G	A	1.0451	-0.0935	0.0091	3.06e-24	intergenic	UGT2B10, UGT2A3
4	69761239	rs115527001	A	G	1.0477	-0.0935	0.0091	3.18e-24	intergenic	UGT2B10, UGT2A3
4	69761311	rs114795848	A	G	1.0477	-0.0935	0.0091	3.18e-24	intergenic	UGT2B10, UGT2A3
4	69694073	rs115832004	G	A	0.9751	-0.1117	0.0109	3.39e-24	intronic	UGT2B10
4	69590120	rs139138450	T	C	0.8487	-0.1542	0.015	3.41e-24	intergenic	UGT2B15, UGT2B10
4	69763910	rs114986615	C	T	1.0478	-0.0934	0.0091	3.44e-24	intergenic	UGT2B10, UGT2A3
4	69763587	rs115202858	G	A	1.0479	-0.0934	0.0091	3.46e-24	intergenic	UGT2B10, UGT2A3
4	69766364	rs115835349	C	T	1.0463	-0.0934	0.0091	3.85e-24	intergenic	UGT2B10, UGT2A3
4	69766443	rs114742135	A	T	1.0461	-0.0934	0.0091	3.87e-24	intergenic	UGT2B10, UGT2A3
4	69724708	rs114184467	T	G	0.9602	-0.1166	0.0114	3.94e-24	intergenic	UGT2B10, UGT2A3
4	69724503	rs115125233	G	A	1.0942	0.0532	0.0052	4.94e-24	intergenic	UGT2B10, UGT2A3
4	69720832	rs116184259	C	A	0.955	-0.1158	0.0113	4.98e-24	intergenic	UGT2B10, UGT2A3
4	69627961	rs144563014	T	A	0.892	-0.1379	0.0135	6.74e-24	intergenic	UGT2B15, UGT2B10
4	69708443	rs9996074	G	T	0.9719	-0.1147	0.0113	9.32e-24
4	69627971	rs142868845	G	A	0.8697	-0.142	0.014	1.13e-23	intergenic	UGT2B15, UGT2B10
4	69771114	rs7681837	C	T	1.0501	-0.0913	0.009	1.43e-23
4	69757183	rs114494748	C	T	1.0521	-0.0902	0.009	2.61e-23	intergenic	UGT2B10, UGT2A3
4	69735308	rs116535483	A	C	0.9627	-0.1131	0.0113	3.24e-23	intergenic	UGT2B10, UGT2A3
4	69627976	rs146083413	T	C	0.8732	-0.1364	0.0137	5.05e-23	intergenic	UGT2B15, UGT2B10
4	69627977	rs140026617	G	A	0.8732	-0.1364	0.0137	5.05e-23	intergenic	UGT2B15, UGT2B10
4	69673415	rs115985945	G	A	0.9585	-0.1649	0.0165	6.54e-23	intergenic	UGT2B15, UGT2B10
4	69723719	rs114006663	A	G	0.9693	-0.1333	0.0134	9.74e-23	intergenic	UGT2B10, UGT2A3
4	69752727	rs115179840	G	A	1.0877	0.0518	0.0052	1.13e-22	intergenic	UGT2B10, UGT2A3
4	69718974	rs114479231	C	A	1.0384	0.0514	0.0052	1.14e-22	intergenic	UGT2B10, UGT2A3
4	69864149	rs116117657	C	T	1.0768	-0.1505	0.0152	1.58e-22	intergenic	UGT2A3, UGT2B7
4	69567218	rs150059016	T	C	0.7907	-0.156	0.0158	1.59e-22	intergenic	UGT2B15, UGT2B10
4	69744150	rs114160639	T	C	1.0818	0.0512	0.0052	3.09e-22	intergenic	UGT2B10, UGT2A3
4	69561735	rs144592739	G	A	0.7897	-0.1536	0.0157	3.73e-22	intergenic	UGT2B15, UGT2B10
4	69849383	rs116245471	G	A	1.0834	-0.1481	0.0152	3.99e-22	intergenic	UGT2A3, UGT2B7
4	69527144	rs146218549	A	G	1.0002	0.1375	0.0141	4.46e-22	intronic	UGT2B15
4	69856176	rs114240244	A	C	1.082	-0.1479	0.0152	5e-22	intergenic	UGT2A3, UGT2B7
4	69861182	rs114757987	T	C	1.0813	-0.1479	0.0152	5.14e-22	intergenic	UGT2A3, UGT2B7
4	69949111	rs7436374	G	A	0.8748	0.115	0.0119	7.79e-22	intergenic	UGT2A3, UGT2B7
4	69739572	rs752209	A	G	0.9763	-0.112	0.0116	1.02e-21
4	69546663	rs147404062	A	G	1.0308	0.1364	0.0141	1.35e-21	intergenic	UGT2B15, UGT2B10
4	69768551	rs115072211	C	T	0.9631	-0.1123	0.0117	1.75e-21	intergenic	UGT2B10, UGT2A3
4	69528080	rs138443646	C	T	1.0222	0.1337	0.0139	1.76e-21	intronic	UGT2B15
4	69746719	rs114691164	C	A	0.973	-0.1116	0.0116	2.02e-21	intergenic	UGT2B10, UGT2A3
4	69573577	rs149491272	A	G	1.1146	0.1324	0.0138	2.15e-21	intergenic	UGT2B15, UGT2B10
4	69577262	rs150209985	T	C	1.1206	0.1318	0.0137	2.16e-21	intergenic	UGT2B15, UGT2B10
4	69572901	rs145184520	A	G	1.1144	0.1323	0.0138	2.33e-21	intergenic	UGT2B15, UGT2B10
4	69569951	rs147821662	A	C	1.1114	0.1324	0.0139	2.97e-21	intergenic	UGT2B15, UGT2B10
4	69856827	rs144198689	A	G	1.0908	-0.1432	0.015	3.1e-21	intergenic	UGT2A3, UGT2B7
4	69750318	rs143347282	A	T	0.9671	-0.1295	0.0136	3.22e-21	intergenic	UGT2B10, UGT2A3
4	69950346	rs6600871	G	C	0.8788	0.112	0.0118	4.01e-21	intergenic	UGT2A3, UGT2B7
4	69644900	chr4:69644900:D	GGGGTGT	G	0.8505	-0.1264	0.0133	5.33e-21
4	69572925	rs145253983	C	T	1.1256	0.1289	0.0136	6.61e-21	intergenic	UGT2B15, UGT2B10
4	69685225	chr4:69685225:D	AAC	A	0.915	-0.2015	0.0213	7.49e-21
4	69685229	chr4:69685229:D	CAG	C	0.915	-0.2015	0.0213	7.49e-21
4	70093260	rs141620393	T	C	0.6474	-0.1487	0.0157	7.66e-21	intergenic	UGT2B11, UGT2B28
4	69593008	rs111871300	C	T	1.1438	-0.1276	0.0135	9.97e-21	intergenic	UGT2B15, UGT2B10
4	69858814	rs116013268	A	G	1.0731	-0.1449	0.0154	1.09e-20	intergenic	UGT2A3, UGT2B7
4	69668384	rs114894287	G	A	1.1639	0.0971	0.0103	1.14e-20	intergenic	UGT2B15, UGT2B10
4	69540024	rs115979922	T	C	1.0755	0.1291	0.0137	1.25e-20	intergenic	UGT2B15, UGT2B10
4	69544455	rs140948610	C	T	0.7625	-0.1501	0.016	1.51e-20	intergenic	UGT2B15, UGT2B10
4	69771283	rs115600564	C	G	1.006	-0.0906	0.0097	1.6e-20	intergenic	UGT2B10, UGT2A3
4	69771309	rs116515246	A	C	1.006	-0.0906	0.0097	1.6e-20	intergenic	UGT2B10, UGT2A3
4	69771354	rs114546260	T	C	1.006	-0.0906	0.0097	1.6e-20	intergenic	UGT2B10, UGT2A3
4	69860295	chr4:69860295:I	T	TA	1.0507	-0.1466	0.0157	2.16e-20	intergenic	UGT2A3, UGT2B7
4	69599806	rs115100695	T	A	1.1615	-0.1247	0.0133	2.31e-20	intergenic	UGT2B15, UGT2B10
4	69558554	rs149394447	C	T	1.1086	0.1294	0.0139	2.58e-20	intergenic	UGT2B15, UGT2B10
4	69665635	rs114135904	A	C	0.7184	0.1144	0.0123	2.66e-20	intergenic	UGT2B15, UGT2B10
4	69558270	rs143103948	T	C	1.1091	0.1291	0.0139	3.06e-20	intergenic	UGT2B15, UGT2B10
4	69664687	rs116209274	C	A	1.1447	0.0983	0.0106	3.15e-20	intergenic	UGT2B15, UGT2B10
4	69660777	rs149796636	C	A	1.1477	-0.098	0.0105	3.41e-20	intergenic	UGT2B15, UGT2B10
4	69660793	rs144684979	A	T	1.1477	-0.098	0.0105	3.41e-20	intergenic	UGT2B15, UGT2B10
4	69770779	rs114237743	G	T	1.0046	-0.0903	0.0097	3.62e-20	intergenic	UGT2B10, UGT2A3
4	69758701	rs115596782	C	T	0.9685	-0.1289	0.0139	3.84e-20	intergenic	UGT2B10, UGT2A3
4	69626729	rs114484008	G	A	1.0238	-0.052	0.0056	3.87e-20	intergenic	UGT2B15, UGT2B10
4	69716139	rs115997581	C	T	0.9528	-0.091	0.0098	4.03e-20	intergenic	UGT2B10, UGT2A3
4	69659219	rs116317050	T	C	1.1482	-0.0978	0.0105	4.06e-20	intergenic	UGT2B15, UGT2B10
4	69762272	rs116121886	G	A	0.9675	-0.1288	0.0139	4.18e-20	intergenic	UGT2B10, UGT2A3
4	69885683	rs148467728	T	C	0.7956	-0.1706	0.0184	4.25e-20	intergenic	UGT2A3, UGT2B7
4	69658683	rs116529706	T	C	1.1486	-0.0977	0.0105	4.27e-20	intergenic	UGT2B15, UGT2B10
4	69629471	rs116301641	G	A	1.1617	-0.0962	0.0104	4.32e-20	intergenic	UGT2B15, UGT2B10
4	69646725	chr4:69646725:I	G	GT	0.804	-0.0964	0.0104	4.43e-20	intergenic	UGT2B15, UGT2B10
4	69835837	rs116483335	G	A	1.082	0.0623	0.0067	4.47e-20	intergenic	UGT2A3, UGT2B7
4	69830871	rs115312808	T	C	1.0836	0.0623	0.0067	4.52e-20	intergenic	UGT2A3, UGT2B7
4	69830359	rs114206878	G	T	1.084	0.0622	0.0067	4.6e-20	intergenic	UGT2A3, UGT2B7
4	69895305	rs112120045	C	A	0.7936	-0.1703	0.0184	5.3e-20	intergenic	UGT2A3, UGT2B7
4	69869388	rs115408065	A	G	1.0742	-0.1434	0.0155	5.47e-20	intergenic	UGT2A3, UGT2B7
4	69670180	rs116304185	C	G	1.0523	0.0958	0.0104	5.49e-20	intergenic	UGT2B15, UGT2B10
4	69633568	rs115381526	A	G	1.0948	0.0496	0.0054	6.55e-20	intergenic	UGT2B15, UGT2B10
4	69930291	rs6827692	A	G	0.7795	0.1715	0.0186	7.66e-20	intergenic	UGT2A3, UGT2B7
4	69833651	rs115204162	G	T	1.0822	0.0618	0.0067	8.24e-20	intergenic	UGT2A3, UGT2B7
4	69653091	rs116004878	G	T	1.1503	-0.0969	0.0105	8.32e-20	intergenic	UGT2B15, UGT2B10
4	69835126	rs114592226	T	C	1.0822	0.0618	0.0067	8.39e-20	intergenic	UGT2A3, UGT2B7
4	69835294	rs116421739	T	G	1.0822	0.0618	0.0067	8.39e-20	intergenic	UGT2A3, UGT2B7
4	69835860	rs115797269	G	T	1.0821	0.0618	0.0067	8.6e-20	intergenic	UGT2A3, UGT2B7
4	69835174	rs115259848	G	A	1.0775	0.0619	0.0067	8.94e-20	intergenic	UGT2A3, UGT2B7
4	69568721	rs75152210	G	A	1.0721	0.1335	0.0145	8.95e-20	intergenic	UGT2B15, UGT2B10
4	69831267	rs116042318	C	A	1.0805	0.0616	0.0067	1.06e-19	intergenic	UGT2A3, UGT2B7
4	69603951	rs116777753	A	G	1.0211	-0.0513	0.0056	1.33e-19	intergenic	UGT2B15, UGT2B10
4	69604233	rs115193261	A	G	1.0213	-0.0513	0.0056	1.35e-19	intergenic	UGT2B15, UGT2B10
4	69619972	rs114056209	C	T	1.1701	-0.0949	0.0104	1.43e-19	intergenic	UGT2B15, UGT2B10
4	69618150	rs117708703	A	T	1.1704	-0.0949	0.0104	1.44e-19	intergenic	UGT2B15, UGT2B10
4	69620336	rs114610451	A	G	1.1701	-0.0949	0.0104	1.44e-19	intergenic	UGT2B15, UGT2B10
4	69542758	rs141422444	T	G	1.1104	0.127	0.0139	1.57e-19	intergenic	UGT2B15, UGT2B10
4	69547700	rs149901371	A	T	1.0085	0.1176	0.0129	1.65e-19	intergenic	UGT2B15, UGT2B10
4	69623579	chr4:69623579:D	CAG	C	1.1707	-0.0946	0.0104	1.7e-19
4	69827340	rs12513263	A	C	1.0892	0.061	0.0067	2.04e-19
4	69634138	rs140429001	C	T	1.1562	-0.0966	0.0107	2.62e-19	intergenic	UGT2B15, UGT2B10
4	69613401	rs115798683	T	C	1.1454	-0.0473	0.0052	2.63e-19	intergenic	UGT2B15, UGT2B10
4	69627359	rs115248993	G	T	1.1721	-0.0938	0.0104	2.86e-19	intergenic	UGT2B15, UGT2B10
4	69822928	rs1824264	T	C	1.0894	0.0608	0.0067	2.97e-19
4	69841774	rs114890801	T	C	1.079	0.0608	0.0067	3.41e-19	intergenic	UGT2A3, UGT2B7
4	69843772	rs116084646	T	A	1.0796	0.0608	0.0067	3.41e-19	intergenic	UGT2A3, UGT2B7
4	69841930	rs115049841	C	G	1.079	0.0608	0.0067	3.44e-19	intergenic	UGT2A3, UGT2B7
4	69843154	rs114319402	C	T	1.079	0.0608	0.0067	3.67e-19	intergenic	UGT2A3, UGT2B7
4	69632325	rs114372162	G	A	1.175	-0.0935	0.0104	4.08e-19	intergenic	UGT2B15, UGT2B10
4	69648939	rs114936483	T	C	1.1575	-0.0946	0.0105	4.17e-19	intergenic	UGT2B15, UGT2B10
4	69643849	rs140042287	A	G	1.1598	-0.0942	0.0105	4.7e-19	intergenic	UGT2B15, UGT2B10
4	69771377	rs115501639	C	T	0.9945	-0.0885	0.0098	5.1e-19	intergenic	UGT2B10, UGT2A3
4	69771424	rs115762070	T	A	0.9945	-0.0885	0.0098	5.1e-19	intergenic	UGT2B10, UGT2A3
4	69608864	chr4:69608864:D	TAA	T	1.168	-0.0937	0.0104	5.18e-19
4	69771448	rs114727760	C	G	0.9946	-0.0885	0.0098	5.24e-19	intergenic	UGT2B10, UGT2A3
4	69609308	rs115922277	G	A	1.1681	-0.0937	0.0104	5.27e-19	intergenic	UGT2B15, UGT2B10
4	69609944	rs111349936	A	G	1.1682	-0.0937	0.0104	5.27e-19	intergenic	UGT2B15, UGT2B10
4	69646567	rs114944364	A	G	1.1588	-0.0942	0.0105	5.27e-19	intergenic	UGT2B15, UGT2B10
4	69639602	rs137952325	G	A	1.1725	-0.0934	0.0104	5.44e-19	intergenic	UGT2B15, UGT2B10
4	69637938	rs147529035	G	A	1.1718	-0.0933	0.0104	5.94e-19	intergenic	UGT2B15, UGT2B10
4	69880238	rs115199149	G	A	0.7516	-0.1705	0.019	6.09e-19	intergenic	UGT2A3, UGT2B7
4	69637048	rs150980134	G	T	1.1716	-0.0932	0.0104	6.37e-19	intergenic	UGT2B15, UGT2B10
4	69611617	rs115976086	C	G	1.1707	-0.0933	0.0104	6.39e-19	intergenic	UGT2B15, UGT2B10
4	69611850	rs115729643	C	T	1.1707	-0.0933	0.0104	6.39e-19	intergenic	UGT2B15, UGT2B10
4	69636689	rs149889390	T	C	1.1716	-0.0932	0.0104	6.63e-19	intergenic	UGT2B15, UGT2B10
4	69530098	rs140362887	A	T	1.069	0.1283	0.0143	6.67e-19	intronic	UGT2B15
4	69636224	rs143292241	G	T	1.1715	-0.0931	0.0104	6.78e-19	intergenic	UGT2B15, UGT2B10
4	69619048	chr4:69619048:D	TA	T	0.9288	-0.1851	0.0207	6.95e-19
4	69635691	rs149551299	A	G	1.1716	-0.0931	0.0104	7.07e-19	intergenic	UGT2B15, UGT2B10
4	69822449	rs115568112	A	G	1.0584	0.06	0.0067	7.56e-19	intergenic	UGT2A3, UGT2B7
4	69632428	rs115208805	A	T	1.1713	-0.0931	0.0104	7.85e-19	intergenic	UGT2B15, UGT2B10
4	69612740	rs115091711	G	A	1.1673	-0.093	0.0104	8.05e-19	intergenic	UGT2B15, UGT2B10
4	69642567	rs17146785	A	G	1.164	-0.0934	0.0105	8.44e-19
4	69729001	chr4:69729001:D	AATTAAC	A	1.0081	-0.0663	0.0074	8.73e-19
4	69641083	rs115881545	C	T	1.163	-0.0933	0.0105	9.14e-19	intergenic	UGT2B15, UGT2B10
4	69640992	rs116467245	T	G	1.1628	-0.0933	0.0105	9.31e-19	intergenic	UGT2B15, UGT2B10
4	69666193	rs115809297	T	C	0.9914	-0.1993	0.0224	1.01e-18	intergenic	UGT2B15, UGT2B10
4	69722960	rs116498746	C	T	1.0056	-0.0663	0.0074	1.1e-18	intergenic	UGT2B10, UGT2A3
4	69723767	rs114866244	T	C	1.0056	-0.0663	0.0074	1.1e-18	intergenic	UGT2B10, UGT2A3
4	69725006	rs115264860	C	T	1.0056	-0.0663	0.0074	1.1e-18	intergenic	UGT2B10, UGT2A3
4	69727220	rs114711302	C	T	1.0056	-0.0663	0.0074	1.1e-18	intergenic	UGT2B10, UGT2A3
4	69727258	rs114858759	G	C	1.0056	-0.0663	0.0074	1.1e-18	intergenic	UGT2B10, UGT2A3
4	69727682	rs7674919	G	A	1.0056	-0.0663	0.0074	1.1e-18
4	69728408	chr4:69728408:D	GA	G	1.0055	-0.0663	0.0074	1.1e-18
4	69783601	rs115437059	G	T	1.0092	-0.0928	0.0104	1.21e-18	intergenic	UGT2B10, UGT2A3
4	69634775	rs192708672	G	T	1.1689	-0.0924	0.0104	1.22e-18	intergenic	UGT2B15, UGT2B10
4	69787064	rs115092003	G	T	1.0092	-0.0927	0.0104	1.24e-18	intergenic	UGT2B10, UGT2A3
4	69788168	rs116502613	T	A	1.0092	-0.0927	0.0104	1.24e-18	intergenic	UGT2B10, UGT2A3
4	69639213	rs146927838	G	T	1.1466	-0.0941	0.0106	1.36e-18	intergenic	UGT2B15, UGT2B10
4	69842205	rs115044584	T	C	1.0717	0.0597	0.0067	1.74e-18	intergenic	UGT2A3, UGT2B7
4	69731361	rs115292836	T	A	1.0058	-0.0657	0.0074	2.24e-18	intergenic	UGT2B10, UGT2A3
4	69797093	rs115340877	G	A	1.009	-0.0918	0.0104	3.12e-18	intronic	UGT2A3
4	69801609	rs141726048	A	G	1.009	-0.0918	0.0104	3.12e-18	intronic	UGT2A3
4	69806836	rs114266982	C	G	1.009	-0.0918	0.0104	3.12e-18	intronic	UGT2A3
4	69645263	rs139553936	T	C	0.8349	-0.1769	0.0202	3.5e-18	intergenic	UGT2B15, UGT2B10
4	69825760	rs117607700	G	A	1.0321	0.059	0.0067	3.9e-18	intergenic	UGT2A3, UGT2B7
4	69671710	rs117776223	A	G	0.8829	-0.1771	0.0202	4.25e-18	intergenic	UGT2B15, UGT2B10
4	69636094	rs191488980	G	A	1.0012	-0.1653	0.0189	4.49e-18	intergenic	UGT2B15, UGT2B10
4	69798562	chr4:69798562:D	CTT	C	0.992	-0.0948	0.0108	4.65e-18
4	69800741	rs114277047	A	T	0.992	-0.0948	0.0108	4.65e-18	intronic	UGT2A3
4	69787328	rs114952287	A	C	0.9924	-0.0947	0.0108	4.73e-18	intergenic	UGT2B10, UGT2A3
4	69826561	rs115505351	G	C	1.0544	0.0585	0.0067	5.01e-18	intergenic	UGT2A3, UGT2B7
4	69656716	rs116222537	A	G	0.9893	-0.1785	0.0205	6.14e-18	intergenic	UGT2B15, UGT2B10
4	70136853	rs7676904	A	G	0.9195	0.1566	0.018	7.22e-18	intergenic	UGT2B11, UGT2B28
4	69812414	rs116451666	G	T	1.0041	-0.0905	0.0105	1.45e-17	intronic	UGT2A3
4	69533131	rs148994655	C	A	0.7086	-0.1483	0.0172	1.5e-17	intronic	UGT2B15
4	70146423	rs150261084	G	A	0.5321	-0.2349	0.0274	1.78e-17	nonsynonymous missense	UGT2B28, A69T
4	70155908	rs189164119	A	T	0.5312	-0.2355	0.0275	1.83e-17	intronic	UGT2B28
4	70166638	rs183361641	G	A	0.5304	-0.2356	0.0275	2.04e-17	intergenic	UGT2B28, UGT2B4
4	69731281	chr4:69731281:I	T	TA	0.7785	-0.0781	0.0092	2.55e-17	intergenic	UGT2B10, UGT2A3
4	70063352	rs149175636	C	G	0.4788	-0.292	0.0347	6.69e-17	intergenic	UGT2B7, UGT2B11
4	70063390	rs143287671	A	T	0.4788	-0.292	0.0347	6.69e-17	intergenic	UGT2B7, UGT2B11
4	69821461	rs115838239	A	G	0.9364	-0.0872	0.0104	8.04e-17	intergenic	UGT2A3, UGT2B7
4	69808256	rs189154587	T	C	0.9201	-0.0903	0.0108	8.45e-17	intronic	UGT2A3
4	69729044	chr4:69729044:I	C	CTTAT	1.0046	-0.0591	0.0071	1.22e-16	intergenic	UGT2B10, UGT2A3
4	69588360	rs140507686	G	T	1.0984	-0.1175	0.0142	2.02e-16	intergenic	UGT2B15, UGT2B10
4	69730266	rs115831974	A	G	1.0072	-0.0582	0.007	2.05e-16	intergenic	UGT2B10, UGT2A3
4	69733034	rs114182442	G	A	1.0085	-0.0582	0.007	2.27e-16	intergenic	UGT2B10, UGT2A3
4	69686993	rs143733783	A	G	0.841	-0.0786	0.0095	2.28e-16	intronic	UGT2B10
4	69728015	rs116372253	A	T	1.0063	-0.0624	0.0076	3.17e-16	intergenic	UGT2B10, UGT2A3
4	69725968	rs115933485	C	T	0.9942	-0.0627	0.0076	3.51e-16	intergenic	UGT2B10, UGT2A3
4	69697564	rs116116268	C	T	1.0154	-0.1711	0.0209	4.66e-16	UTR3	UGT2B10
4	70236674	rs10029577	G	T	0.9798	0.1609	0.0198	7.15e-16	intergenic	UGT2B28, UGT2B4
4	69878330	chr4:69878330:D	CCT	C	0.5878	-0.1412	0.0174	7.67e-16
4	69804305	rs146879893	G	A	0.9822	-0.0872	0.0107	7.79e-16	intronic	UGT2A3
4	69725272	chr4:69725272:D	TAGTG	T	1.0134	-0.0577	0.0072	1.3e-15
4	69702037	chr4:69702037:I	C	CT	0.9006	-0.0688	0.0085	1.38e-15	intergenic	UGT2B10, UGT2A3
4	69761450	rs114348625	T	A	1.1939	0.0475	0.0059	1.6e-15	intergenic	UGT2B10, UGT2A3
4	69715945	rs10020273	T	C	1.2145	0.047	0.0059	1.63e-15
4	69607529	chr4:69607529:D	AAC	A	0.8023	-0.0709	0.0088	1.78e-15
4	69858465	rs143186089	C	T	0.942	-0.143	0.0179	2.18e-15	intergenic	UGT2A3, UGT2B7
4	69858469	rs147178744	C	G	0.942	-0.143	0.0179	2.18e-15	intergenic	UGT2A3, UGT2B7
4	69724936	rs116293706	C	T	1.0117	-0.0577	0.0072	2.21e-15	intergenic	UGT2B10, UGT2A3
4	69713860	rs115850515	A	G	1.2073	0.0469	0.0059	2.33e-15	intergenic	UGT2B10, UGT2A3
4	69722395	rs116144535	G	A	1.0084	-0.0575	0.0072	2.33e-15	intergenic	UGT2B10, UGT2A3
4	69665890	rs114474500	G	A	1.0166	-0.0605	0.0076	2.45e-15	intergenic	UGT2B15, UGT2B10
4	70149824	rs4495113	A	G	0.6314	0.1655	0.0208	2.47e-15	intronic	UGT2B28
4	69721871	rs116020958	G	A	1.0124	-0.0621	0.0078	3.09e-15	intergenic	UGT2B10, UGT2A3
4	69693635	chr4:69693635:D	CTA	C	0.9906	-0.0622	0.0078	3.3e-15
4	69719579	rs116286898	G	A	1.011	-0.0619	0.0078	3.9e-15	intergenic	UGT2B10, UGT2A3
4	69697187	rs115469184	G	A	0.9913	-0.062	0.0078	3.94e-15	UTR3	UGT2B10
4	69803723	rs191592946	A	T	0.9437	-0.0857	0.0108	3.95e-15	intronic	UGT2A3
4	70265862	rs61657885	A	G	1.0703	-0.1401	0.0177	4.17e-15	intergenic	UGT2B28, UGT2B4
4	69710257	rs116532484	G	A	1.0101	-0.0618	0.0078	4.18e-15	intergenic	UGT2B10, UGT2A3
4	69649502	chr4:69649502:I	G	GC	1.0926	-0.0816	0.0104	4.89e-15	intergenic	UGT2B15, UGT2B10
4	69735706	chr4:69735706:D	TA	T	1.0123	-0.0616	0.0078	5.34e-15
4	69732112	rs115109494	T	A	1.0127	-0.0615	0.0078	5.89e-15	intergenic	UGT2B10, UGT2A3
4	69731469	rs116118888	G	C	1.0128	-0.0615	0.0078	6e-15	intergenic	UGT2B10, UGT2A3
4	69716229	rs116285470	C	A	1.0102	-0.0614	0.0078	6.35e-15	intergenic	UGT2B10, UGT2A3
4	70297186	rs148898074	T	C	0.7718	-0.1632	0.0208	7.1e-15	intergenic	UGT2B28, UGT2B4
4	69701926	rs116219798	C	T	1.008	-0.0609	0.0078	7.18e-15	intergenic	UGT2B10, UGT2A3
4	69702791	rs114683433	T	C	1.008	-0.0609	0.0078	7.18e-15	intergenic	UGT2B10, UGT2A3
4	69592725	rs142751613	G	T	1.0024	-0.1232	0.0157	7.77e-15	intergenic	UGT2B15, UGT2B10
4	69717836	rs115952417	A	T	1.0115	-0.0612	0.0078	7.88e-15	intergenic	UGT2B10, UGT2A3
4	70282828	rs151285855	A	T	0.7577	-0.1658	0.0212	8.21e-15	intergenic	UGT2B28, UGT2B4
4	70282824	rs142140035	C	A	0.7575	-0.1658	0.0212	8.55e-15	intergenic	UGT2B28, UGT2B4
4	69729558	rs115756472	A	G	1.0248	-0.0524	0.0067	8.9e-15	intergenic	UGT2B10, UGT2A3
4	69719134	rs116262380	C	T	1.021	-0.0525	0.0067	9.1e-15	intergenic	UGT2B10, UGT2A3
4	69587588	rs138145255	C	T	0.8959	-0.1692	0.0217	9.51e-15	intergenic	UGT2B15, UGT2B10
4	69706195	rs150984550	G	A	0.8018	-0.1863	0.0239	1.07e-14	intergenic	UGT2B10, UGT2A3
4	69719987	chr4:69719987:I	C	CA	1.0022	-0.0568	0.0074	1.68e-14	intergenic	UGT2B10, UGT2A3
4	69613721	rs114564871	T	C	1.0765	-0.0433	0.0056	2.34e-14	intergenic	UGT2B15, UGT2B10
4	69613378	rs114938014	T	A	1.0765	-0.0433	0.0056	2.36e-14	intergenic	UGT2B15, UGT2B10
4	66566101	rs4504310	C	G	1.3274	-0.0779	0.0102	2.76e-14	intergenic	LOC100144602, CENPC
4	69970485	rs76482848	A	G	0.9716	-0.1702	0.0223	2.95e-14	intronic	UGT2B7
4	69868257	rs116642839	C	A	1.0357	-0.1549	0.0202	2.98e-14	intergenic	UGT2A3, UGT2B7
4	69909567	rs114825099	A	G	1.0293	-0.1596	0.0209	3e-14	intergenic	UGT2A3, UGT2B7
4	69868576	rs114281658	G	C	1.0375	-0.1548	0.0202	3.03e-14	intergenic	UGT2A3, UGT2B7
4	69967289	rs60394168	G	A	0.9722	-0.1701	0.0222	3.07e-14	intronic	UGT2B7
4	69849946	rs116558295	C	T	1.0365	-0.1543	0.0202	3.56e-14	intergenic	UGT2A3, UGT2B7
4	69993553	rs114850582	C	A	0.9968	-0.1552	0.0204	3.67e-14	intergenic	UGT2B7, UGT2B11
4	69857184	chr4:69857184:I	C	CA	1.0391	-0.154	0.0202	3.83e-14	intergenic	UGT2A3, UGT2B7
4	69858091	rs143353775	G	T	1.0392	-0.154	0.0202	3.85e-14	intergenic	UGT2A3, UGT2B7
4	69859395	rs114244000	G	T	1.0393	-0.154	0.0202	3.85e-14	intergenic	UGT2A3, UGT2B7
4	69856415	rs143835686	C	A	1.0373	-0.154	0.0202	3.94e-14	intergenic	UGT2A3, UGT2B7
4	69850209	rs116047773	T	C	1.037	-0.154	0.0202	4.08e-14	intergenic	UGT2A3, UGT2B7
4	69851433	rs114285616	G	A	1.037	-0.154	0.0202	4.09e-14	intergenic	UGT2A3, UGT2B7
4	69670306	rs115455642	A	G	1.0991	0.0557	0.0073	4.62e-14	intergenic	UGT2B15, UGT2B10
4	69722947	rs115646318	C	T	1.0129	-0.0517	0.0068	4.72e-14	intergenic	UGT2B10, UGT2A3
4	69737036	rs11726946	A	G	1.0139	-0.0516	0.0068	5.01e-14
4	69698255	rs145435483	A	T	0.9999	-0.0516	0.0068	5.12e-14	downstream	UGT2B10
4	69724084	chr4:69724084:I	A	AT	1.0119	-0.0516	0.0068	5.13e-14	intergenic	UGT2B10, UGT2A3
4	69663760	chr4:69663760:D	TTTTG	T	1.0039	-0.0564	0.0074	5.22e-14
4	69736764	rs115411305	C	G	1.0135	-0.0515	0.0068	5.45e-14	intergenic	UGT2B10, UGT2A3
4	69882512	rs115869305	A	G	1.0763	-0.1491	0.0197	5.47e-14	intergenic	UGT2A3, UGT2B7
4	69666349	rs115574850	A	G	1.0085	-0.0562	0.0074	5.75e-14	intergenic	UGT2B15, UGT2B10
4	69436223	rs76011384	C	G	0.7804	-0.1546	0.0205	6.1e-14	intergenic	UGT2B17, UGT2B15
4	69721246	rs115524872	G	A	1.0112	-0.0515	0.0068	6.12e-14	intergenic	UGT2B10, UGT2A3
4	69826932	rs115654499	C	T	1.0478	-0.1519	0.0202	7.5e-14	intergenic	UGT2A3, UGT2B7
4	70138176	rs11725085	C	T	0.4403	-0.2671	0.0355	7.63e-14	intergenic	UGT2B11, UGT2B28
4	66566958	chr4:66566958:D	CCTGA	C	1.3608	-0.0738	0.0098	7.67e-14
4	69730377	rs116691259	G	A	1.0133	-0.0513	0.0068	7.95e-14	intergenic	UGT2B10, UGT2A3
4	69550796	rs115732506	G	A	0.8764	-0.168	0.0224	8.64e-14	intergenic	UGT2B15, UGT2B10
4	69878518	rs58618511	G	A	1.0878	-0.1469	0.0196	8.97e-14	intergenic	UGT2A3, UGT2B7
4	69718019	rs115479464	T	G	1.001	-0.051	0.0068	9.33e-14	intergenic	UGT2B10, UGT2A3
4	69937905	rs116382689	T	G	1.0574	-0.1527	0.0204	9.87e-14	intergenic	UGT2A3, UGT2B7
4	69937917	rs115699502	C	A	1.0574	-0.1527	0.0204	9.87e-14	intergenic	UGT2A3, UGT2B7
4	69666880	rs115460213	C	G	1.0127	-0.0557	0.0074	1.03e-13	intergenic	UGT2B15, UGT2B10
4	69665785	rs115938276	C	T	1.0128	-0.0557	0.0074	1.05e-13	intergenic	UGT2B15, UGT2B10
4	69709072	rs115988542	A	C	1.0222	-0.0503	0.0067	1.1e-13	intergenic	UGT2B10, UGT2A3
4	69363598	rs145492638	C	G	1.0677	0.0799	0.0107	1.19e-13	downstream	TMPRSS11E
4	69663298	rs115110082	C	A	1.0128	-0.0556	0.0074	1.19e-13	intergenic	UGT2B15, UGT2B10
4	69664437	rs116311199	A	G	1.0129	-0.0556	0.0074	1.19e-13	intergenic	UGT2B15, UGT2B10
4	69664454	rs115169631	T	C	1.0129	-0.0556	0.0074	1.19e-13	intergenic	UGT2B15, UGT2B10
4	69660832	rs115235008	C	T	1.0128	-0.0556	0.0074	1.23e-13	intergenic	UGT2B15, UGT2B10
4	69662983	rs114544519	C	T	1.0128	-0.0555	0.0074	1.23e-13	intergenic	UGT2B15, UGT2B10
4	69661413	rs115820371	C	T	1.0128	-0.0555	0.0074	1.24e-13	intergenic	UGT2B15, UGT2B10
4	69541216	rs150036368	T	G	0.8821	-0.1688	0.0226	1.26e-13	intergenic	UGT2B15, UGT2B10
4	69660736	rs116429394	G	T	1.0128	-0.0555	0.0074	1.27e-13	intergenic	UGT2B15, UGT2B10
4	69659898	rs147418383	T	A	1.0129	-0.0555	0.0074	1.29e-13	intergenic	UGT2B15, UGT2B10
4	69659235	rs115630565	A	T	1.0129	-0.0555	0.0074	1.32e-13	intergenic	UGT2B15, UGT2B10
4	69694012	rs115455627	C	T	0.9737	-0.0509	0.0068	1.33e-13	intronic	UGT2B10
4	69705337	rs115597438	A	G	1.0246	-0.0501	0.0067	1.33e-13	intergenic	UGT2B10, UGT2A3
4	69943340	rs147638418	C	T	1.0698	-0.1505	0.0202	1.36e-13	intergenic	UGT2A3, UGT2B7
4	69664704	rs115204171	A	G	1.0101	-0.0555	0.0075	1.45e-13	intergenic	UGT2B15, UGT2B10
4	69633094	rs116065955	C	T	1.0145	-0.0553	0.0074	1.55e-13	intergenic	UGT2B15, UGT2B10
4	69634128	rs147929029	C	T	1.0146	-0.0553	0.0074	1.57e-13	intergenic	UGT2B15, UGT2B10
4	69634533	rs115988299	C	T	1.0145	-0.0553	0.0074	1.57e-13	intergenic	UGT2B15, UGT2B10
4	69651804	rs115322069	A	T	1.0141	-0.0553	0.0074	1.57e-13	intergenic	UGT2B15, UGT2B10
4	69641252	rs114936600	A	C	1.0145	-0.0552	0.0074	1.61e-13	intergenic	UGT2B15, UGT2B10
4	69533425	rs149334260	C	G	0.8697	-0.1666	0.0225	1.69e-13	intronic	UGT2B15
4	69642698	rs116058697	C	T	1.015	-0.0552	0.0074	1.69e-13	intergenic	UGT2B15, UGT2B10
4	69642799	rs114871968	C	G	1.015	-0.0552	0.0074	1.69e-13	intergenic	UGT2B15, UGT2B10
4	69642889	rs115441964	C	G	1.015	-0.0552	0.0074	1.69e-13	intergenic	UGT2B15, UGT2B10
4	69645658	rs115598634	T	G	1.0152	-0.0552	0.0074	1.7e-13	intergenic	UGT2B15, UGT2B10
4	69645774	rs115411163	A	C	1.0152	-0.0552	0.0074	1.7e-13	intergenic	UGT2B15, UGT2B10
4	69646009	rs11726899	T	C	1.0152	-0.0552	0.0074	1.71e-13
4	70176963	rs79832339	T	C	0.9005	0.1393	0.0188	1.94e-13	intergenic	UGT2B28, UGT2B4
4	69701067	rs11737566	T	G	1.0224	-0.0496	0.0067	2.13e-13
4	69526585	rs145803268	A	G	0.9484	0.0897	0.0122	2.45e-13	intronic	UGT2B15
4	70104325	rs4426854	C	A	0.9323	0.1493	0.0203	2.48e-13	intergenic	UGT2B11, UGT2B28
4	70286333	rs111973521	C	A	0.7301	-0.1665	0.0226	2.53e-13	intergenic	UGT2B28, UGT2B4
4	69734159	rs116136678	C	A	0.9975	-0.0535	0.0073	2.66e-13	intergenic	UGT2B10, UGT2A3
4	70286747	chr4:70286747:D	CT	C	1.0051	-0.1678	0.0229	3.21e-13
4	69810470	rs114831289	C	A	1.0086	-0.148	0.0202	3.53e-13	intronic	UGT2A3
4	70207652	rs112063000	G	A	0.57	-0.2202	0.0301	3.77e-13	intergenic	UGT2B28, UGT2B4
4	69667720	rs115577688	C	T	1.0078	-0.0543	0.0074	3.92e-13	intergenic	UGT2B15, UGT2B10
4	69691521	rs114467430	G	C	1.0058	-0.0493	0.0068	4.01e-13	intronic	UGT2B10
4	69595671	rs115637058	T	A	0.9738	-0.1326	0.0182	4.44e-13	intergenic	UGT2B15, UGT2B10
4	69789395	chr4:69789395:I	A	AG	1.0664	0.0511	0.007	5.17e-13	intergenic	UGT2B10, UGT2A3
4	70264240	rs112665616	C	A	0.7056	-0.1613	0.0223	5.76e-13	intergenic	UGT2B28, UGT2B4
4	70309876	rs111750971	G	A	0.8391	-0.1206	0.0167	6.12e-13	intergenic	UGT2B28, UGT2B4
4	69592833	rs149845093	C	T	1.0814	-0.0439	0.0061	6.39e-13	intergenic	UGT2B15, UGT2B10
4	69696638	rs114612625	A	G	0.9417	-0.0619	0.0086	6.63e-13	UTR3	UGT2B10
4	69627951	rs113347659	A	G	1.0232	-0.0373	0.0052	7.75e-13	intergenic	UGT2B15, UGT2B10
4	69762953	rs7678798	T	C	1.0437	-0.0483	0.0067	8.7e-13
4	69792494	rs116072420	C	T	1.0909	0.0505	0.007	9.84e-13	intergenic	UGT2B10, UGT2A3
4	69780731	rs114508937	T	C	1.1018	0.1391	0.0194	1.05e-12	intergenic	UGT2B10, UGT2A3
4	69807355	rs116176691	C	T	1.0815	0.0505	0.0071	1.11e-12	intronic	UGT2A3
4	69807469	rs115246969	C	T	1.0815	0.0505	0.0071	1.11e-12	intronic	UGT2A3
4	69599633	rs114319480	T	C	1.0036	-0.1312	0.0184	1.22e-12	intergenic	UGT2B15, UGT2B10
4	69735968	rs143375194	A	G	0.9972	-0.0479	0.0067	1.4e-12	intergenic	UGT2B10, UGT2A3
4	69796838	rs115947394	G	A	1.0936	0.05	0.007	1.46e-12	intronic	UGT2A3
4	69848754	rs116783656	C	T	1.0825	-0.1359	0.0191	1.53e-12	intergenic	UGT2A3, UGT2B7
4	69789680	rs115187589	T	C	1.094	0.0499	0.007	1.54e-12	intergenic	UGT2B10, UGT2A3
4	70303471	rs78121186	C	T	0.8378	-0.1193	0.0168	1.55e-12	intergenic	UGT2B28, UGT2B4
4	69596746	rs114991122	T	C	1.0059	-0.1302	0.0183	1.68e-12	intergenic	UGT2B15, UGT2B10
4	69865396	rs114828073	G	A	1.108	0.0531	0.0075	1.72e-12	intergenic	UGT2A3, UGT2B7
4	69816200	rs116408837	G	A	1.0802	0.0503	0.0071	1.74e-12	intronic	UGT2A3
4	69864584	rs114861209	A	G	1.1081	0.0531	0.0075	1.74e-12	intergenic	UGT2A3, UGT2B7
4	69586772	rs139824779	T	C	0.9949	-0.1298	0.0184	2.29e-12	intergenic	UGT2B15, UGT2B10
4	69706273	rs6843220	T	C	1.0308	-0.0476	0.0067	2.3e-12
4	69586150	rs147612586	G	A	0.9927	-0.1298	0.0184	2.36e-12	intergenic	UGT2B15, UGT2B10
4	69584179	rs143959594	A	T	0.9876	-0.1297	0.0184	2.62e-12	intergenic	UGT2B15, UGT2B10
4	67096441	rs4860732	T	G	1.2222	0.0836	0.0119	2.82e-12	intergenic	LOC100144602, CENPC
4	69801782	rs143341838	G	A	1.0842	0.0496	0.0071	2.83e-12	intronic	UGT2A3
4	69592308	rs138066062	C	T	0.9985	-0.1203	0.0171	2.96e-12	intergenic	UGT2B15, UGT2B10
4	69592858	rs141137741	C	T	0.9985	-0.1203	0.0171	2.96e-12	intergenic	UGT2B15, UGT2B10
4	69772690	rs115389770	A	G	0.9865	-0.0484	0.0069	3.04e-12	intergenic	UGT2B10, UGT2A3
4	69592052	rs144526318	T	C	0.9983	-0.1202	0.0171	3.05e-12	intergenic	UGT2B15, UGT2B10
4	69535335	rs142555698	A	G	0.7885	-0.1071	0.0153	3.15e-12	intronic	UGT2B15
4	69862670	rs141316939	G	A	1.1185	-0.08	0.0114	3.5e-12	intergenic	UGT2A3, UGT2B7
4	69741025	rs115201582	T	C	0.9798	-0.1403	0.0201	3.56e-12	intergenic	UGT2B10, UGT2A3
4	69447137	rs73823675	G	A	0.7708	-0.1331	0.0191	4.01e-12	intergenic	UGT2B17, UGT2B15
4	67092794	rs4860206	A	C	1.2365	0.0821	0.0118	4.15e-12	intergenic	LOC100144602, CENPC
4	69574901	rs145743618	G	C	0.9655	-0.1292	0.0185	4.29e-12	intergenic	UGT2B15, UGT2B10
4	69854923	rs115324620	T	C	1.1065	0.0522	0.0075	4.36e-12	intergenic	UGT2A3, UGT2B7
4	69782486	rs115320695	A	G	1.0942	0.0488	0.007	4.52e-12	intergenic	UGT2B10, UGT2A3
4	69787432	rs6825873	A	G	1.0945	0.0488	0.007	4.54e-12
4	69740493	rs116743746	A	G	0.9816	-0.1382	0.0199	4.74e-12	intergenic	UGT2B10, UGT2A3
4	69784702	rs114608474	G	A	1.0938	0.0487	0.007	4.77e-12	intergenic	UGT2B10, UGT2A3
4	69572708	rs184458189	T	C	0.9607	-0.1291	0.0186	4.79e-12	intergenic	UGT2B15, UGT2B10
4	69572857	rs147421370	T	C	0.9611	-0.129	0.0186	4.87e-12	intergenic	UGT2B15, UGT2B10
4	69572125	rs151055200	A	G	0.9591	-0.129	0.0186	5.14e-12	intergenic	UGT2B15, UGT2B10
4	69526532	rs149568687	G	A	0.5985	0.0487	0.007	5.37e-12	intronic	UGT2B15
4	69596840	rs114950453	C	T	1.1305	-0.0404	0.0058	5.86e-12	intergenic	UGT2B15, UGT2B10
4	69563361	rs142108818	T	C	0.9421	-0.129	0.0187	6.3e-12	intergenic	UGT2B15, UGT2B10
4	69562483	rs143683277	T	C	0.9398	-0.1289	0.0187	6.52e-12	intergenic	UGT2B15, UGT2B10
4	69593613	rs115054827	G	A	1.0029	-0.1232	0.0178	6.63e-12	intergenic	UGT2B15, UGT2B10
4	69594509	rs115934945	G	A	1.0029	-0.1232	0.0178	6.63e-12	intergenic	UGT2B15, UGT2B10
4	69591197	rs142929186	T	A	1.0025	-0.123	0.0178	7.05e-12	intergenic	UGT2B15, UGT2B10
4	69764890	rs115805235	C	T	0.9277	-0.1322	0.0192	7.18e-12	intergenic	UGT2B10, UGT2A3
4	69557365	rs145290659	C	T	0.9315	-0.1283	0.0187	8.89e-12	intergenic	UGT2B15, UGT2B10
4	69977675	rs114549958	A	T	0.8596	-0.1801	0.0263	9.01e-12	intronic	UGT2B7
4	69846463	rs116288035	T	G	1.0412	0.1377	0.0201	9.43e-12	intergenic	UGT2A3, UGT2B7
4	67098141	rs1304422	A	T	1.1786	0.0852	0.0125	1.06e-11	intergenic	LOC100144602, CENPC
4	69791395	rs115092841	C	A	0.9706	0.1156	0.017	1.22e-11	intergenic	UGT2B10, UGT2A3
4	69544277	rs148875734	C	T	0.9093	-0.1303	0.0192	1.41e-11	intergenic	UGT2B15, UGT2B10
4	69550300	rs149039600	G	A	0.9168	-0.1276	0.0188	1.51e-11	intergenic	UGT2B15, UGT2B10
4	69705068	rs115043481	T	C	0.9212	-0.1294	0.0191	1.65e-11	intergenic	UGT2B10, UGT2A3
4	69864573	chr4:69864573:I	T	TAAC	1.0548	0.0471	0.007	1.83e-11	intergenic	UGT2A3, UGT2B7
4	69571960	rs145461001	T	G	0.9562	-0.122	0.0181	2.02e-11	intergenic	UGT2B15, UGT2B10
4	70422826	rs4538549	C	A	0.9579	0.0892	0.0132	2.09e-11	intergenic	UGT2B4, UGT2A1
4	69716160	rs115765131	C	T	1.0753	0.0352	0.0052	2.12e-11	intergenic	UGT2B10, UGT2A3
4	69861962	rs114301709	A	G	1.1183	0.0467	0.007	2.44e-11	intergenic	UGT2A3, UGT2B7
4	69863439	rs116600933	G	A	1.1228	0.0466	0.0069	2.45e-11	intergenic	UGT2A3, UGT2B7
4	69863571	rs115880148	A	T	1.1228	0.0466	0.0069	2.45e-11	intergenic	UGT2A3, UGT2B7
4	69863100	rs115182303	A	C	1.1229	0.0466	0.0069	2.46e-11	intergenic	UGT2A3, UGT2B7
4	69766948	rs115178865	G	A	1.0033	-0.1301	0.0194	2.59e-11	intergenic	UGT2B10, UGT2A3
4	69862424	rs116044142	A	G	1.1226	0.0466	0.0069	2.6e-11	intergenic	UGT2A3, UGT2B7
4	69862344	rs116037342	G	A	1.1225	0.0466	0.0069	2.63e-11	intergenic	UGT2A3, UGT2B7
4	69733365	chr4:69733365:I	T	TC	0.7323	0.0514	0.0077	2.75e-11	intergenic	UGT2B10, UGT2A3
4	69771935	rs12651295	A	C	1.0364	-0.045	0.0067	2.92e-11
4	69508088	rs145435046	C	T	0.8486	-0.1561	0.0234	2.97e-11	intergenic	UGT2B17, UGT2B15
4	69508037	rs139496270	G	T	0.8487	-0.156	0.0233	2.99e-11	intergenic	UGT2B17, UGT2B15
4	69550741	rs145555764	T	C	0.9063	-0.1253	0.0188	3.16e-11	intergenic	UGT2B15, UGT2B10
4	69864569	chr4:69864569:I	T	TTAA	1.0686	0.0463	0.007	3.54e-11	intergenic	UGT2A3, UGT2B7
4	69864055	rs114201465	G	A	1.1171	0.0463	0.007	3.57e-11	intergenic	UGT2A3, UGT2B7
4	69863941	rs114973334	A	G	1.1172	0.0463	0.007	3.6e-11	intergenic	UGT2A3, UGT2B7
4	69864482	rs116786219	G	A	1.1169	0.0463	0.007	3.6e-11	intergenic	UGT2A3, UGT2B7
4	69863734	rs116702628	T	G	1.1173	0.0463	0.007	3.64e-11	intergenic	UGT2A3, UGT2B7
4	69544059	rs140560180	C	G	0.7913	-0.0563	0.0085	3.78e-11	intergenic	UGT2B15, UGT2B10
4	69855515	rs114486736	T	G	1.1208	0.0461	0.007	3.95e-11	intergenic	UGT2A3, UGT2B7
4	69545586	rs146801823	A	T	0.8961	-0.1242	0.0188	4.78e-11	intergenic	UGT2B15, UGT2B10
4	70290277	rs111659882	T	C	0.8676	-0.0966	0.0146	4.92e-11	intergenic	UGT2B28, UGT2B4
4	69849405	rs116798228	G	A	1.1318	0.0454	0.0069	5.59e-11	intergenic	UGT2A3, UGT2B7
4	69787468	rs115381641	T	C	0.9565	-0.0809	0.0123	5.68e-11	intergenic	UGT2B10, UGT2A3
4	69860055	rs116454332	T	C	1.0354	0.0452	0.0069	5.74e-11	intergenic	UGT2A3, UGT2B7
4	70408415	rs139389609	C	T	0.8235	0.0674	0.0103	6.36e-11	intergenic	UGT2B4, UGT2A1
4	69590692	rs149340100	G	T	1.0824	0.0398	0.0061	6.37e-11	intergenic	UGT2B15, UGT2B10
4	69796530	rs115840819	C	A	0.9563	-0.0805	0.0123	6.43e-11	intronic	UGT2A3
4	69804357	rs144607806	G	A	0.9563	-0.0805	0.0123	6.43e-11	intronic	UGT2A3
13	20754015	rs113827500	G	A	0.7359	0.1836	0.028	6.65e-11	intergenic	GJA3, GJB2
4	69988579	chr4:69988579:D	TA	T	0.9705	-0.1499	0.0229	6.84e-11
4	69595736	rs114914218	G	A	1.0837	0.0397	0.0061	7.37e-11	intergenic	UGT2B15, UGT2B10
4	70340065	rs116299433	C	T	0.8033	-0.1206	0.0184	7.56e-11	intergenic	UGT2B28, UGT2B4
4	69863494	chr4:69863494:I	T	TGGATGATTC	1.1128	0.0454	0.0069	7.66e-11	intergenic	UGT2A3, UGT2B7
4	69545701	rs140490424	C	T	0.887	-0.1227	0.0188	7.86e-11	intergenic	UGT2B15, UGT2B10
13	20755284	rs112191488	G	T	0.7677	0.1798	0.0275	7.93e-11	intergenic	GJA3, GJB2
4	69564066	rs139916529	G	T	0.8242	-0.0965	0.0148	8.3e-11	intergenic	UGT2B15, UGT2B10
4	71519506	rs60598462	T	A	1.2384	-0.0631	0.0097	8.9e-11	intergenic	ENAM, IGJ
4	70392471	rs6820288	T	C	1.1593	0.0919	0.0141	9.52e-11	intergenic	UGT2B4, UGT2A1
4	69771836	rs116603350	A	G	1.0379	-0.0435	0.0067	9.62e-11	intergenic	UGT2B10, UGT2A3
4	69853538	rs116675861	T	A	1.129	0.0453	0.007	9.94e-11	intergenic	UGT2A3, UGT2B7
4	69806203	rs115423964	A	C	0.9804	-0.1308	0.0201	1.02e-10	intronic	UGT2A3
4	69790343	rs17147006	G	A	1.0263	-0.1239	0.0191	1.06e-10
4	69612557	rs190868773	G	A	0.8727	-0.1446	0.0223	1.14e-10	intergenic	UGT2B15, UGT2B10
4	71484769	rs111594526	T	G	1.3913	-0.0618	0.0095	1.19e-10	intergenic	AMBN, ENAM
4	69579332	rs138825512	A	C	1.0693	0.0396	0.0061	1.22e-10	intergenic	UGT2B15, UGT2B10
4	69727312	rs13123929	G	A	1.0606	0.0326	0.005	1.29e-10
4	69495476	rs145621559	G	T	0.8378	-0.1505	0.0233	1.38e-10	intergenic	UGT2B17, UGT2B15
4	72553309	rs7660979	G	A	1.2782	-0.0641	0.0099	1.41e-10	intergenic	SLC4A4, GC
4	70387482	rs115155371	G	A	0.7801	-0.1194	0.0185	1.43e-10	intergenic	UGT2B4, UGT2A1
4	69601154	rs115508952	T	C	1.0721	0.0396	0.0061	1.5e-10	intergenic	UGT2B15, UGT2B10
4	69848967	rs114246578	A	G	1.1257	0.0446	0.0069	1.64e-10	intergenic	UGT2A3, UGT2B7
4	73269503	rs59482570	G	C	1.0948	-0.0963	0.015	1.66e-10	intronic	ADAMTS3
4	69850452	rs6818594	T	C	1.1257	0.0446	0.0069	1.69e-10
4	69851501	rs115880908	G	C	1.1257	0.0446	0.0069	1.69e-10	intergenic	UGT2A3, UGT2B7
4	69783353	rs115073481	C	T	1.1132	0.1193	0.0186	1.75e-10	intergenic	UGT2B10, UGT2A3
4	69787484	rs116666271	A	G	1.1137	0.1192	0.0186	1.77e-10	intergenic	UGT2B10, UGT2A3
4	69573536	rs138889971	T	C	1.0686	0.0392	0.0061	1.79e-10	intergenic	UGT2B15, UGT2B10
4	69789428	rs115973407	C	A	1.1124	0.1191	0.0186	1.88e-10	intergenic	UGT2B10, UGT2A3
4	69569975	rs141694485	G	A	0.8503	-0.1154	0.018	1.9e-10	intergenic	UGT2B15, UGT2B10
4	69852289	rs116244050	A	C	1.1225	0.0444	0.0069	1.95e-10	intergenic	UGT2A3, UGT2B7
4	71484642	rs61554527	C	T	1.3843	-0.0614	0.0096	1.99e-10	intergenic	AMBN, ENAM
4	69708718	rs115046468	G	A	1.0603	0.0322	0.0051	2.14e-10	intergenic	UGT2B10, UGT2A3
4	71505000	rs16845251	C	T	1.3717	-0.071	0.0111	2.2e-10	intronic	ENAM
4	69545492	rs145249676	A	G	1.0846	-0.0374	0.0059	2.28e-10	intergenic	UGT2B15, UGT2B10
4	70515788	rs78537600	T	C	1.1275	-0.0436	0.0069	2.55e-10	intronic	UGT2A1
4	70429506	chr4:70429506:D	AAC	A	0.9575	0.089	0.014	2.66e-10
4	72550997	rs60850489	T	C	1.2558	-0.0626	0.0099	2.92e-10	intergenic	SLC4A4, GC
10	14633024	rs4750535	C	T	1.0947	0.0999	0.0158	2.99e-10	intronic	FAM107B
4	71489157	rs5020228	A	G	1.4254	-0.0587	0.0093	3.4e-10	intergenic	AMBN, ENAM
4	70227956	rs4235130	G	T	0.8889	0.1186	0.0188	3.41e-10	intergenic	UGT2B28, UGT2B4
4	69702040	chr4:69702040:D	ACCTC	A	0.8965	-0.0595	0.0094	3.46e-10
11	129411245	rs60734431	C	T	0.8983	-0.1185	0.0188	3.67e-10	intergenic	BARX2, TMEM45B
4	69910965	rs190326433	C	T	0.732	-0.1784	0.0284	3.98e-10	intergenic	UGT2A3, UGT2B7
4	71483056	rs28416413	A	G	1.3849	-0.0599	0.0095	4.17e-10	intergenic	AMBN, ENAM
4	71014004	rs1717588	T	C	1.0405	-0.0917	0.0146	4.58e-10	intergenic	CSN1S2BP, C4orf40
4	72551449	rs60380281	T	C	1.2843	-0.0617	0.0099	4.89e-10	intergenic	SLC4A4, GC
4	69556667	rs145918936	C	T	1.0604	0.0384	0.0062	5.66e-10	intergenic	UGT2B15, UGT2B10
15	35353634	rs112681568	G	C	1.1132	-0.0873	0.0141	6.66e-10	intergenic	ZNF770, ANP32AP1
4	69937504	rs191723982	A	G	0.732	-0.1756	0.0283	6.99e-10	intergenic	UGT2A3, UGT2B7
4	69804531	rs141206766	G	A	1.0809	0.1141	0.0184	7.13e-10	intronic	UGT2A3
4	73357626	rs73825553	C	G	1.0229	-0.1126	0.0182	7.3e-10	intronic	ADAMTS3
4	69695310	rs11249509	G	A	1.0852	0.0512	0.0083	8.11e-10
4	69447752	rs58536749	G	T	0.7395	-0.115	0.0186	8.27e-10	intergenic	UGT2B17, UGT2B15
4	70971799	rs79091615	C	T	1.0108	-0.0927	0.015	8.3e-10	intergenic	CSN1S2AP, CSN1S2BP
4	71516586	rs72859681	T	C	1.3341	-0.0559	0.0091	8.98e-10	intergenic	ENAM, IGJ
4	70022224	rs11729433	C	T	0.565	-0.1853	0.0301	9.06e-10	intergenic	UGT2B7, UGT2B11
4	66569636	rs75202226	C	T	1.0011	-0.1435	0.0233	9.42e-10	intergenic	LOC100144602, CENPC
4	69823253	rs115444048	C	A	1.0378	-0.0486	0.0079	1.08e-09	intergenic	UGT2A3, UGT2B7
4	70351502	rs6848208	C	T	1.1869	-0.1031	0.0169	1.11e-09	intronic	UGT2B4
4	69948496	rs141939610	T	C	0.7161	-0.1725	0.0282	1.14e-09	intergenic	UGT2A3, UGT2B7
4	69429160	rs146042994	T	C	0.7412	-0.1359	0.0222	1.18e-09	intronic	UGT2B17
4	69547656	rs139695968	C	T	1.0541	0.0377	0.0062	1.29e-09	intergenic	UGT2B15, UGT2B10
4	69694941	rs294772	A	G	1.0832	0.0505	0.0083	1.3e-09
4	69612008	rs143798418	A	G	0.864	-0.1426	0.0234	1.31e-09	intergenic	UGT2B15, UGT2B10
4	69695818	rs150612934	G	A	1.0831	0.0506	0.0083	1.34e-09	intronic	UGT2B10
4	71473099	chr4:71473099:I	T	TA	1.2741	-0.0597	0.0098	1.35e-09	downstream	AMBN
4	71473123	rs59142068	C	T	1.2741	-0.0597	0.0098	1.35e-09	downstream	AMBN
4	69546022	rs144558711	T	A	1.0533	0.0375	0.0062	1.52e-09	intergenic	UGT2B15, UGT2B10
11	129410579	rs57099543	C	T	0.9057	-0.1322	0.0218	1.57e-09	intergenic	BARX2, TMEM45B
4	72547436	rs7656604	G	A	1.2982	-0.0574	0.0095	1.58e-09	intergenic	SLC4A4, GC
4	72553476	rs60080322	T	A	1.271	-0.0608	0.01	1.64e-09	intergenic	SLC4A4, GC
4	69701609	rs116589258	T	A	1.0838	0.0502	0.0083	1.67e-09	intergenic	UGT2B10, UGT2A3
4	69545326	rs140620330	G	T	1.0464	0.0376	0.0062	1.7e-09	intergenic	UGT2B15, UGT2B10
4	71549602	rs6841468	G	A	1.4042	-0.0604	0.01	1.9e-09	intergenic	IGJ, UTP3
4	69713406	rs114591972	T	C	1.0832	0.05	0.0083	1.91e-09	intergenic	UGT2B10, UGT2A3
4	69708143	rs114527270	C	T	1.0854	0.0498	0.0083	2.13e-09	intergenic	UGT2B10, UGT2A3
14	63047683	rs76513344	C	A	1.0516	-0.0995	0.0166	2.16e-09	intergenic	LINC00644, KCNH5
4	71569379	rs28557119	C	T	1.3457	-0.0622	0.0104	2.17e-09	intergenic	UTP3, RUFY3
4	71528212	chr4:71528212:I	A	AT	1.3716	-0.0614	0.0102	2.18e-09	intronic	IGJ
4	69649504	chr4:69649504:I	C	CT	1.0628	-0.0699	0.0116	2.24e-09	intergenic	UGT2B15, UGT2B10
4	69941123	rs192225959	C	T	0.8257	-0.1447	0.0241	2.36e-09	intergenic	UGT2A3, UGT2B7
4	69627563	rs113602399	A	G	1.1758	-0.0355	0.0059	2.37e-09	intergenic	UGT2B15, UGT2B10
4	71494619	rs1993579	G	A	1.4161	-0.0557	0.0093	2.42e-09	UTR5	ENAM
4	69548362	rs144956623	T	C	1.0471	0.037	0.0062	2.46e-09	intergenic	UGT2B15, UGT2B10
4	69702631	rs115121855	T	G	1.0851	0.0497	0.0083	2.47e-09	intergenic	UGT2B10, UGT2A3
11	16559630	rs4287304	C	T	0.8419	-0.1028	0.0172	2.53e-09	intergenic	SOX6, C11orf58
4	69709471	rs115829597	A	G	1.0845	0.0496	0.0083	2.55e-09	intergenic	UGT2B10, UGT2A3
4	71494366	rs1993580	A	G	1.4171	-0.0556	0.0093	2.58e-09	upstream	ENAM
4	69715929	rs117064712	A	T	1.0844	0.0496	0.0083	2.6e-09	intergenic	UGT2B10, UGT2A3
4	69435938	rs74333491	C	T	0.7794	-0.1363	0.0228	2.7e-09	intergenic	UGT2B17, UGT2B15
4	71493837	rs2609430	T	C	1.4174	-0.0555	0.0093	2.7e-09	upstream	ENAM
4	69374944	rs115354288	G	C	0.9808	-0.1476	0.0247	2.79e-09	intergenic	TMPRSS11E, UGT2B17
4	71493471	rs2553324	A	G	1.4177	-0.0554	0.0093	2.83e-09	upstream	ENAM
4	70380252	rs6600776	G	T	1.1134	0.0943	0.0158	2.84e-09	intergenic	UGT2B4, UGT2A1
4	70269355	rs111777582	T	C	0.815	-0.0979	0.0165	3.04e-09	intergenic	UGT2B28, UGT2B4
10	14632592	rs4750534	C	T	1.1051	0.0952	0.016	3.06e-09	intronic	FAM107B
10	14633452	rs10752339	G	T	1.1051	0.0952	0.016	3.06e-09	intronic	FAM107B
4	71030010	rs12651310	A	G	1.2203	0.0518	0.0087	3.07e-09	UTR3	C4orf40
10	14634554	rs10796207	A	G	1.1052	0.0952	0.016	3.09e-09	intronic	FAM107B
4	71492663	rs28376949	C	T	1.4183	-0.0551	0.0093	3.22e-09	intergenic	AMBN, ENAM
4	69890331	rs188629050	C	T	0.8132	-0.1422	0.0239	3.24e-09	intergenic	UGT2A3, UGT2B7
4	69903804	rs193103968	G	A	0.8129	-0.1421	0.0239	3.35e-09	intergenic	UGT2A3, UGT2B7
4	69906554	rs189712843	A	G	0.8129	-0.1421	0.0239	3.35e-09	intergenic	UGT2A3, UGT2B7
4	69731744	rs114498507	T	A	1.0836	0.0493	0.0083	3.36e-09	intergenic	UGT2B10, UGT2A3
4	70407273	rs1347048	C	T	1.0205	0.0945	0.0159	3.43e-09	intergenic	UGT2B4, UGT2A1
4	69733021	rs115035797	G	A	1.0835	0.0492	0.0083	3.5e-09	intergenic	UGT2B10, UGT2A3
4	73600658	rs139345055	C	A	1.2394	-0.0656	0.0111	3.51e-09	intergenic	ADAMTS3, COX18
4	69736333	rs114534864	A	G	1.0809	0.0493	0.0083	3.62e-09	intergenic	UGT2B10, UGT2A3
4	71510836	rs7664896	C	G	1.3522	-0.0512	0.0086	3.63e-09	UTR3	ENAM
4	70655250	rs17147658	A	T	1.2475	-0.0759	0.0128	3.74e-09	intergenic	SULT1B1, SULT1E1
4	69735305	rs114617148	A	G	1.0834	0.0492	0.0083	3.76e-09	intergenic	UGT2B10, UGT2A3
4	69735409	rs116251694	T	C	1.0834	0.0492	0.0083	3.76e-09	intergenic	UGT2B10, UGT2A3
4	71562603	rs28465388	C	T	1.3382	-0.061	0.0103	4.05e-09	intergenic	UTP3, RUFY3
4	69855163	rs147119243	T	C	1.0725	0.0393	0.0067	4.1e-09	intergenic	UGT2A3, UGT2B7
4	69595929	rs113130970	G	A	1.0796	0.0358	0.0061	4.19e-09	intergenic	UGT2B15, UGT2B10
4	69690389	rs114895673	T	A	0.9151	0.0623	0.0106	4.32e-09	intronic	UGT2B10
4	73600370	rs115037744	T	C	1.2431	-0.0648	0.011	4.39e-09	intergenic	ADAMTS3, COX18
4	73359237	rs1085947	T	C	1.0726	0.092	0.0156	4.43e-09	intronic	ADAMTS3
15	36600963	rs77594494	C	T	0.8865	-0.1375	0.0233	4.43e-09	intergenic	MIR4510, C15orf41
4	69545227	rs150616602	T	C	1.0349	0.0361	0.0061	4.44e-09	intergenic	UGT2B15, UGT2B10
7	66045512	rs6952407	A	G	1.1719	0.033	0.0056	4.51e-09	intergenic	LOC493754, KCTD7
7	66079798	rs56229325	C	T	1.0944	0.0319	0.0054	4.53e-09	intergenic	LOC493754, KCTD7
4	75655317	chr4:75655317:D	GTCTC	G	0.9453	-0.1044	0.0178	4.66e-09
4	67115215	rs13119180	C	T	0.8695	0.0635	0.0108	4.7e-09	intergenic	LOC100144602, CENPC
12	52510222	rs150237977	C	T	1.0708	0.0879	0.015	4.83e-09	intergenic	C12orf44, KRT80
5	36251891	rs16902858	A	G	1.1742	0.0868	0.0148	4.98e-09	intronic	RANBP3L
4	69774440	rs116071409	C	T	1.0225	-0.1083	0.0185	5.16e-09	intergenic	UGT2B10, UGT2A3
7	66108152	chr7:66108152:D	CACA	C	1.1331	0.0313	0.0053	5.7e-09
4	69430815	rs141826156	T	C	0.7697	-0.1327	0.0227	5.89e-09	intronic	UGT2B17
4	66574227	rs112853013	G	A	1.0152	-0.1334	0.0228	5.95e-09	intergenic	LOC100144602, CENPC
7	66079201	rs62467857	C	T	1.1102	0.0314	0.0054	6.01e-09	intergenic	LOC493754, KCTD7
4	71493064	rs112421574	G	C	1.2351	-0.0688	0.0118	6.12e-09	intergenic	AMBN, ENAM
4	73264557	rs56284004	T	C	0.9924	-0.1118	0.0192	6.12e-09	intronic	ADAMTS3
4	69455832	rs116398292	A	C	0.7	-0.1519	0.026	6.23e-09	intergenic	UGT2B17, UGT2B15
4	66144671	rs17085995	T	C	0.8817	-0.151	0.0259	6.33e-09	intergenic	LOC401134, EPHA5
7	66036398	rs3898855	G	C	1.1361	0.0312	0.0054	6.39e-09	ncRNA_intronic	LOC493754
15	100874329	rs78798963	T	G	0.9384	-0.1276	0.0219	6.4e-09	intronic	ADAMTS17
4	66569726	rs76676113	G	A	1.0122	-0.1332	0.0229	6.58e-09	intergenic	LOC100144602, CENPC
4	66570244	rs78212296	G	A	1.0122	-0.1332	0.0229	6.58e-09	intergenic	LOC100144602, CENPC
4	72553407	rs7691541	T	C	1.2546	-0.0582	0.01	6.61e-09	intergenic	SLC4A4, GC
4	66571969	rs114212950	C	T	1.0143	-0.1329	0.0228	6.62e-09	intergenic	LOC100144602, CENPC
4	70362742	rs2736442	A	G	1.1359	0.0929	0.016	6.84e-09	intergenic	UGT2B4, UGT2A1
15	36602964	chr15:36602964:D	CAAA	C	0.8693	-0.1371	0.0236	6.95e-09
7	66094008	rs35526611	C	T	1.1264	0.0314	0.0054	7.02e-09	UTR5	KCTD7
7	66000932	rs2302918	A	G	1.1278	-0.0311	0.0054	7.3e-09	intergenic	LINC00174, LOC493754
4	58148386	rs6832720	A	G	1.2635	-0.0585	0.0101	7.36e-09	intergenic	IGFBP7-AS1
4	70397101	rs116046219	C	T	1.1192	-0.0928	0.016	7.37e-09	intergenic	UGT2B4, UGT2A1
4	67073143	rs1115363	A	T	0.9697	0.0974	0.0168	7.38e-09	intergenic	LOC100144602, CENPC
4	70219302	rs7664174	C	G	0.9264	-0.1184	0.0204	7.49e-09	intergenic	UGT2B28, UGT2B4
4	71505123	rs111837816	G	A	1.2742	-0.0535	0.0092	7.54e-09	intronic	ENAM
7	66070608	rs71563125	G	A	1.1311	0.0311	0.0054	7.79e-09	intergenic	LOC493754, KCTD7
4	70971747	rs77724179	C	T	1.0696	-0.0892	0.0154	7.8e-09	intergenic	CSN1S2AP, CSN1S2BP
7	66007363	rs13224319	A	G	1.1039	-0.0313	0.0054	7.89e-09	intergenic	LINC00174, LOC493754
4	71511259	rs7665492	G	C	1.3778	-0.0514	0.0089	7.93e-09	UTR3	ENAM
7	66025641	rs801196	G	A	1.127	0.0311	0.0054	8.24e-09	ncRNA_exonic	LOC493754
7	66111457	rs10272546	A	G	1.1317	0.031	0.0054	8.36e-09	intergenic	KCTD7, RABGEF1
7	66022144	rs801205	C	A	1.1318	0.0309	0.0054	8.47e-09	ncRNA_intronic	LOC493754
7	66022889	rs810400	G	C	1.1322	0.0309	0.0054	8.48e-09	ncRNA_intronic	LOC493754
7	66015689	rs801211	T	G	1.1322	0.0309	0.0054	8.51e-09	intergenic	LINC00174, LOC493754
7	66010577	rs801217	C	T	1.1322	0.0309	0.0054	8.52e-09	intergenic	LINC00174, LOC493754
4	70297265	rs143564748	A	G	0.9578	-0.142	0.0246	8.54e-09	intergenic	UGT2B28, UGT2B4
7	66005152	rs62465434	A	C	1.1322	-0.0309	0.0054	8.56e-09	intergenic	LINC00174, LOC493754
7	66030612	rs801193	T	G	1.1327	0.0309	0.0053	8.56e-09	ncRNA_intronic	LOC493754
7	66036987	rs10278816	T	C	1.1327	0.0309	0.0053	8.56e-09	ncRNA_intronic	LOC493754
7	66042441	rs10281080	T	C	1.1327	0.0309	0.0053	8.56e-09	ncRNA_exonic	LOC493754
7	66044286	rs6965056	C	T	1.1327	0.0309	0.0053	8.56e-09	upstream	LOC493754
7	66039009	chr7:66039009:I	T	TA	1.1325	0.0309	0.0053	8.61e-09	ncRNA_intronic	LOC493754
4	66658713	rs6854928	A	G	1.1355	0.0851	0.0147	8.63e-09	intergenic	LOC100144602, CENPC
7	66110224	rs2191268	A	G	1.1319	0.0309	0.0054	8.73e-09	intergenic	KCTD7, RABGEF1
7	66098482	rs3764903	G	A	1.1319	0.0309	0.0054	8.76e-09	intronic	KCTD7
7	65425894	rs9530	A	G	1.1817	-0.0322	0.0056	8.79e-09	nonsynonymous missense	GUSB, L649P
7	66103694	rs1860470	G	C	1.1319	0.0309	0.0054	8.81e-09	intronic	KCTD7
7	66107252	rs1860468	T	C	1.1319	0.0309	0.0054	8.81e-09	UTR3	KCTD7
20	55400455	rs16980344	A	G	0.9686	0.1284	0.0222	8.82e-09	intergenic	TFAP2C, BMP7
7	66088990	rs35986979	G	A	1.1318	0.0309	0.0054	8.84e-09	intergenic	LOC493754, KCTD7
7	66087195	rs7807944	C	G	1.1319	0.0309	0.0054	8.88e-09	intergenic	LOC493754, KCTD7
7	66096028	rs10263935	G	A	1.1319	0.0309	0.0054	8.91e-09	intronic	KCTD7
4	70367835	chr4:70367835:D	CT	C	0.7632	-0.0972	0.0168	8.95e-09
7	66071597	rs6960778	C	T	1.1321	0.0309	0.0054	8.96e-09	intergenic	LOC493754, KCTD7
7	66072054	chr7:66072054:D	CCTT	C	1.1178	0.0313	0.0054	9.07e-09
7	66087165	rs7807930	C	T	1.1319	0.0309	0.0054	9.1e-09	intergenic	LOC493754, KCTD7
7	66042976	rs10950044	A	G	1.1322	0.0309	0.0053	9.11e-09	ncRNA_exonic	LOC493754
7	66198798	rs2707845	C	T	1.1026	-0.0311	0.0054	9.12e-09	intergenic	KCTD7, RABGEF1
4	69869226	rs115803359	A	G	1.0798	0.0318	0.0055	9.15e-09	intergenic	UGT2A3, UGT2B7
7	65986845	rs12698534	C	T	1.1311	-0.0309	0.0054	9.31e-09	intergenic	LINC00174, LOC493754
14	80665333	rs17110436	C	T	1.1012	-0.0944	0.0164	9.37e-09	UTR3	DIO2
4	70438229	rs114004809	G	A	1.1194	-0.0986	0.0171	9.4e-09	intergenic	UGT2B4, UGT2A1
4	66565835	rs112057979	G	A	1.0932	-0.1198	0.0208	9.55e-09	intergenic	LOC100144602, CENPC
4	66579096	rs111481204	A	G	0.9954	-0.1375	0.0239	9.62e-09	intergenic	LOC100144602, CENPC
4	70376235	chr4:70376235:D	AT	A	1.121	0.0925	0.0161	1.01e-08
7	66011667	rs801216	T	C	1.1292	0.0308	0.0054	1.01e-08	intergenic	LINC00174, LOC493754
4	69456570	rs79860606	C	T	0.7047	-0.1502	0.0261	1.03e-08	intergenic	UGT2B17, UGT2B15
4	70649268	rs6845529	T	G	1.2458	-0.074	0.0129	1.03e-08	intergenic	SULT1B1, SULT1E1
4	69437096	rs60259033	A	G	0.7589	-0.1273	0.0221	1.04e-08	intergenic	UGT2B17, UGT2B15
7	66068509	rs79009421	G	C	1.1239	0.0309	0.0054	1.04e-08	intergenic	LOC493754, KCTD7
7	66012802	chr7:66012802:I	C	CA	1.1162	0.0313	0.0055	1.05e-08	intergenic	LINC00174, LOC493754
4	70500986	rs6842466	T	A	1.1108	-0.0396	0.0069	1.06e-08	intronic	UGT2A1
4	71489797	rs77172804	C	T	1.0468	-0.0836	0.0146	1.06e-08	intergenic	AMBN, ENAM
4	70653706	rs58686308	A	C	1.2474	-0.0739	0.0129	1.07e-08	intergenic	SULT1B1, SULT1E1
4	70427889	rs7441978	A	G	1.1596	0.0873	0.0152	1.1e-08	intergenic	UGT2B4, UGT2A1
4	70312971	rs9997499	C	A	1.0093	-0.0456	0.008	1.12e-08	intergenic	UGT2B28, UGT2B4
4	70381993	rs1817904	C	T	1.1344	0.0923	0.0161	1.12e-08	intergenic	UGT2B4, UGT2A1
4	70385651	rs1560606	C	A	1.1344	0.0923	0.0161	1.12e-08	intergenic	UGT2B4, UGT2A1
4	70390981	rs10011506	A	G	1.1344	0.0923	0.0161	1.12e-08	intergenic	UGT2B4, UGT2A1
7	66051540	rs10278371	C	A	1.1293	0.0307	0.0054	1.13e-08	intergenic	LOC493754, KCTD7
7	66165310	rs2659906	T	C	1.2047	-0.0288	0.005	1.13e-08	intergenic	KCTD7, RABGEF1
7	65244723	chr7:65244723:I	T	TC	1.1607	0.0327	0.0057	1.14e-08	intergenic	LOC441242, VKORC1L1
7	65494135	rs2946579	C	T	1.1669	0.032	0.0056	1.15e-08	intergenic	GUSB, ASL
4	70254998	rs111389965	G	A	0.8117	-0.0927	0.0162	1.16e-08	intergenic	UGT2B28, UGT2B4
4	70373693	rs1594587	T	A	1.1347	0.0922	0.0161	1.17e-08	intergenic	UGT2B4, UGT2A1
4	70377255	rs2082335	T	C	1.1347	0.0922	0.0161	1.17e-08	intergenic	UGT2B4, UGT2A1
4	70383186	rs13136057	T	A	1.1343	0.0922	0.0161	1.17e-08	intergenic	UGT2B4, UGT2A1
4	69689052	rs116948934	T	C	0.7432	0.0389	0.0068	1.21e-08	intronic	UGT2B10
4	73269301	rs73824595	A	T	1.0107	-0.1062	0.0186	1.23e-08	intronic	ADAMTS3
14	39487147	rs144654850	G	A	1.0193	-0.1341	0.0235	1.25e-08	intergenic	LINC00639, SEC23A
4	70509237	rs6600795	T	G	1.1317	-0.0393	0.0069	1.26e-08	intronic	UGT2A1
4	70345200	rs115743158	C	A	1.0789	-0.1049	0.0184	1.27e-08	downstream	UGT2B4
4	73217669	rs73824537	A	C	1.1605	-0.077	0.0135	1.3e-08	intronic	ADAMTS3
4	70500830	rs6824954	T	C	1.1158	-0.0392	0.0069	1.32e-08	intronic	UGT2A1
4	70015769	rs4466106	G	A	0.994	0.0448	0.0078	1.33e-08	intergenic	UGT2B7, UGT2B11
7	66063074	rs10272357	G	A	1.1307	0.0305	0.0053	1.34e-08	intergenic	LOC493754, KCTD7
7	66116633	rs7793569	T	G	1.1273	0.0306	0.0054	1.39e-08	intergenic	KCTD7, RABGEF1
4	63352072	rs56808940	A	T	1.162	-0.0794	0.0139	1.42e-08	intergenic	LPHN3, TECRL
4	69861343	chr4:69861343:I	A	AAGCCTCTTG	0.9876	0.0377	0.0066	1.43e-08	intergenic	UGT2A3, UGT2B7
7	66029235	chr7:66029235:D	TAC	T	1.1269	0.0305	0.0054	1.52e-08
7	66139178	chr7:66139178:I	G	GC	1.1281	0.0305	0.0054	1.53e-08	intergenic	KCTD7, RABGEF1
4	69666363	rs114192652	T	A	1.024	0.0613	0.0108	1.54e-08	intergenic	UGT2B15, UGT2B10
7	66138978	rs7785213	A	C	1.1281	0.0304	0.0054	1.54e-08	intergenic	KCTD7, RABGEF1
7	66153101	rs2659915	A	G	1.1281	-0.0304	0.0054	1.56e-08	intergenic	KCTD7, RABGEF1
7	66214010	rs2707853	G	A	1.1281	-0.0304	0.0054	1.56e-08	intronic	RABGEF1
7	66129830	rs2286684	G	T	1.1281	0.0304	0.0054	1.57e-08	intergenic	KCTD7, RABGEF1
7	66129843	rs2286683	G	A	1.1281	0.0304	0.0054	1.57e-08	intergenic	KCTD7, RABGEF1
7	66133578	rs10274773	G	A	1.1281	0.0304	0.0054	1.57e-08	intergenic	KCTD7, RABGEF1
7	66127806	rs3857688	G	A	1.1281	0.0304	0.0054	1.58e-08	intergenic	KCTD7, RABGEF1
7	66141074	rs11773829	G	A	1.1281	0.0304	0.0054	1.59e-08	intergenic	KCTD7, RABGEF1
1	213597050	rs320459	T	C	1.1081	-0.1149	0.0203	1.63e-08	intergenic	RPS6KC1, LINC00538
7	66146284	rs10234018	A	T	1.1281	0.0304	0.0054	1.68e-08	intergenic	KCTD7, RABGEF1
7	66186721	rs2659899	A	G	1.1107	-0.0306	0.0054	1.68e-08	intergenic	KCTD7, RABGEF1
7	66036191	rs3857686	C	T	1.1303	0.0303	0.0054	1.69e-08	ncRNA_intronic	LOC493754
14	80660357	rs114539406	G	T	1.0784	-0.1115	0.0197	1.73e-08	intergenic	NRXN3, DIO2
14	63047483	rs74056984	T	C	1.063	-0.088	0.0156	1.76e-08	intergenic	LINC00644, KCNH5
7	66148302	rs7788576	G	A	1.1283	0.0303	0.0054	1.78e-08	intergenic	KCTD7, RABGEF1
4	69863302	chr4:69863302:D	TGTATTA	T	1.0595	0.0383	0.0068	1.81e-08
2	224848626	rs75329861	T	A	1.0179	-0.134	0.0237	1.83e-08	intronic	SERPINE2
7	66046724	rs10249404	G	A	1.1315	0.0302	0.0053	1.84e-08	intergenic	LOC493754, KCTD7
7	66152712	rs2707849	T	C	1.1285	-0.0303	0.0054	1.84e-08	intergenic	KCTD7, RABGEF1
4	69546857	rs139918455	G	A	0.853	-0.0412	0.0073	1.85e-08	intergenic	UGT2B15, UGT2B10
7	66151352	rs2659916	C	G	1.1248	-0.0303	0.0054	1.85e-08	intergenic	KCTD7, RABGEF1
7	66033033	rs801190	C	T	1.1315	0.0302	0.0053	1.87e-08	ncRNA_intronic	LOC493754
7	66056803	rs1968127	C	T	1.1315	0.0302	0.0053	1.87e-08	intergenic	LOC493754, KCTD7
7	66060408	rs6460305	G	A	1.1315	0.0302	0.0053	1.87e-08	intergenic	LOC493754, KCTD7
4	70346057	rs1051752	T	G	1.153	-0.1083	0.0192	1.88e-08	UTR3	UGT2B4
7	66005018	rs28698552	A	G	1.131	-0.0302	0.0053	1.88e-08	intergenic	LINC00174, LOC493754
4	69525647	chr4:69525647:I	G	GT	0.7	0.0391	0.0069	1.89e-08	intronic	UGT2B15
7	66048285	rs6943696	T	C	1.1316	0.0301	0.0053	1.89e-08	intergenic	LOC493754, KCTD7
15	35350267	rs74008044	A	G	1.0243	-0.0925	0.0164	1.9e-08	intergenic	ZNF770, ANP32AP1
7	65984605	rs12533585	G	C	1.131	-0.0302	0.0053	1.93e-08	intergenic	LINC00174, LOC493754
4	70035908	rs74402019	C	T	0.9891	-0.1379	0.0245	1.96e-08	intergenic	UGT2B7, UGT2B11
7	66054406	rs10215132	C	A	1.1306	0.0301	0.0053	1.97e-08	intergenic	LOC493754, KCTD7
4	67092942	rs1397761	T	A	0.9918	0.0602	0.0107	2.05e-08	intergenic	LOC100144602, CENPC
4	73362840	chr4:73362840:I	A	AT	1.0305	-0.0984	0.0175	2.05e-08	intronic	ADAMTS3
4	70348954	chr4:70348954:I	C	CATA	1.1556	-0.1085	0.0193	2.07e-08	intronic	UGT2B4
4	70349877	rs41297437	T	C	1.1556	-0.1085	0.0193	2.07e-08	intronic	UGT2B4
4	70350033	rs58414570	A	G	1.1556	-0.1085	0.0193	2.07e-08	intronic	UGT2B4
7	66197139	rs1553609	T	C	1.1255	-0.0302	0.0054	2.07e-08	intergenic	KCTD7, RABGEF1
7	66191517	rs62466793	G	A	1.1249	-0.0302	0.0054	2.12e-08	intergenic	KCTD7, RABGEF1
9	110873780	rs60634637	T	C	1.0462	0.0942	0.0168	2.14e-08	intergenic	KLF4, ACTL7B
4	70428633	rs10033911	A	G	1.1346	0.09	0.016	2.16e-08	intergenic	UGT2B4, UGT2A1
7	66031952	rs801192	C	G	1.1293	0.03	0.0053	2.24e-08	ncRNA_intronic	LOC493754
4	69341094	rs144030179	T	A	0.9367	-0.1162	0.0207	2.25e-08	intronic	TMPRSS11E
4	70398651	rs4296742	A	G	1.1368	0.0899	0.016	2.29e-08	intergenic	UGT2B4, UGT2A1
4	70403132	rs1835833	C	A	1.1368	0.0899	0.016	2.29e-08	intergenic	UGT2B4, UGT2A1
4	70412534	rs4397063	T	C	1.1368	0.0899	0.016	2.29e-08	intergenic	UGT2B4, UGT2A1
4	70416025	rs1897440	T	C	1.1368	-0.0899	0.016	2.29e-08	intergenic	UGT2B4, UGT2A1
4	70424182	chr4:70424182:D	GC	G	1.1368	-0.0899	0.016	2.29e-08
4	70429743	rs4454002	G	T	1.1368	0.0899	0.016	2.29e-08	intergenic	UGT2B4, UGT2A1
4	70430029	rs116602595	G	C	1.1368	-0.0899	0.016	2.29e-08	intergenic	UGT2B4, UGT2A1
4	70430737	rs114982902	G	A	1.1368	-0.0899	0.016	2.29e-08	intergenic	UGT2B4, UGT2A1
4	70495961	rs17618178	C	T	1.1004	-0.039	0.007	2.33e-08	intronic	UGT2A1
7	3797613	rs6462287	T	A	1.2847	-0.0666	0.0119	2.33e-08	intronic	SDK1
7	66157020	rs2707841	A	G	1.1261	-0.0301	0.0054	2.33e-08	intergenic	KCTD7, RABGEF1
7	3796148	rs55806931	G	A	1.2824	-0.0666	0.0119	2.47e-08	intronic	SDK1
7	66161007	rs4717310	C	T	1.1257	-0.03	0.0054	2.49e-08	intergenic	KCTD7, RABGEF1
4	69689053	rs117276535	G	A	0.7472	0.0381	0.0068	2.52e-08	intronic	UGT2B10
7	66177098	rs7782320	C	T	1.1183	-0.0303	0.0054	2.53e-08	intergenic	KCTD7, RABGEF1
7	66197233	rs1553610	T	C	1.1216	-0.03	0.0054	2.53e-08	intergenic	KCTD7, RABGEF1
7	65993444	rs4718361	T	C	1.1039	-0.0299	0.0054	2.54e-08	intergenic	LINC00174, LOC493754
12	52510168	rs73303209	C	T	1.0956	0.0863	0.0154	2.54e-08	intergenic	C12orf44, KRT80
7	66176387	rs11772264	T	C	1.126	-0.03	0.0054	2.56e-08	intergenic	KCTD7, RABGEF1
7	3795878	rs6975953	G	C	1.2441	-0.0653	0.0117	2.57e-08	intronic	SDK1
7	66147656	rs2003301	G	C	1.1241	0.03	0.0054	2.58e-08	intergenic	KCTD7, RABGEF1
7	66210195	rs7789184	A	T	1.1248	-0.03	0.0054	2.6e-08	intronic	RABGEF1
4	70395418	rs4694755	A	G	1.1368	0.09	0.0161	2.66e-08	intergenic	UGT2B4, UGT2A1
4	69633226	rs114472430	G	A	1.028	0.0603	0.0108	2.7e-08	intergenic	UGT2B15, UGT2B10
7	3797905	rs6462288	T	G	1.286	-0.0663	0.0119	2.7e-08	intronic	SDK1
7	66151239	rs2707848	T	G	1.1064	-0.0303	0.0054	2.71e-08	intergenic	KCTD7, RABGEF1
4	72448818	rs2123664	C	T	1.0757	0.0913	0.0164	2.72e-08	intergenic	SLC4A4, GC
4	66578631	rs57472890	A	G	0.974	-0.1244	0.0223	2.75e-08	intergenic	LOC100144602, CENPC
7	66157999	rs2659912	G	C	1.1265	-0.0299	0.0054	2.77e-08	intergenic	KCTD7, RABGEF1
4	70406362	rs13141598	G	T	1.1384	0.0896	0.0161	2.87e-08	intergenic	UGT2B4, UGT2A1
4	70496262	rs17674648	C	T	1.1011	-0.0387	0.0069	2.89e-08	intronic	UGT2A1
4	79607027	rs72861230	G	A	1.1325	-0.0763	0.0137	2.89e-08	intergenic	LOC100505702, BMP2K
7	66052739	rs7357230	A	G	1.1048	0.0303	0.0054	2.89e-08	intergenic	LOC493754, KCTD7
4	65586594	rs28549389	T	A	1.1279	-0.0879	0.0158	2.9e-08	intergenic	TECRL, LOC401134
7	65473080	rs1723268	A	C	1.1786	-0.0311	0.0056	2.91e-08	intergenic	GUSB, ASL
7	65473688	rs1701760	A	G	1.1782	-0.031	0.0056	2.97e-08	intergenic	GUSB, ASL
4	69736137	rs143239134	G	T	0.9817	0.0532	0.0096	2.98e-08	intergenic	UGT2B10, UGT2A3
7	66124774	rs6975195	T	A	1.1205	0.03	0.0054	3.03e-08	intergenic	KCTD7, RABGEF1
7	66226620	rs4279493	C	T	1.1264	-0.0298	0.0054	3.03e-08	intronic	RABGEF1
7	66203870	rs2707850	G	T	1.1258	-0.0298	0.0054	3.09e-08	intergenic	KCTD7, RABGEF1
7	66209057	rs7783924	A	C	1.1244	-0.0298	0.0054	3.1e-08	intronic	RABGEF1
4	69662297	rs115550351	G	A	1.0249	0.0599	0.0108	3.17e-08	intergenic	UGT2B15, UGT2B10
7	66205582	rs1110414	A	G	1.1251	-0.0298	0.0054	3.17e-08	upstream	RABGEF1
7	66212597	rs2707854	G	A	1.1277	-0.0297	0.0054	3.18e-08	intronic	RABGEF1
7	66077290	rs28830215	A	G	1.0877	0.0303	0.0055	3.2e-08	intergenic	LOC493754, KCTD7
14	39511441	rs17108767	A	C	1.0144	-0.1284	0.0231	3.2e-08	intronic	SEC23A
7	66217112	rs2659889	A	G	1.1262	-0.0297	0.0054	3.24e-08	intronic	RABGEF1
7	66255646	rs3778909	G	C	1.1267	-0.0297	0.0054	3.26e-08	intronic	RABGEF1
4	73608985	chr4:73608985:D	AT	A	1.2715	-0.0597	0.0108	3.29e-08
7	66211010	rs2707856	T	A	1.1269	-0.0297	0.0054	3.29e-08	intronic	RABGEF1
7	66191579	rs62466794	G	A	1.1076	-0.0297	0.0054	3.3e-08	intergenic	KCTD7, RABGEF1
19	43933119	rs9636129	T	C	1.1421	0.0341	0.0061	3.3e-08	intergenic	TEX101, LYPD3
7	66228732	rs10252765	G	C	1.1269	-0.0297	0.0054	3.35e-08	intronic	RABGEF1
15	101073444	rs80332023	C	T	1.0749	-0.12	0.0217	3.35e-08	intronic	CERS3
4	69687168	rs149765687	G	A	0.9602	0.0615	0.0111	3.37e-08	intronic	UGT2B10
7	66242593	rs4717319	A	G	1.1269	-0.0297	0.0054	3.37e-08	intronic	RABGEF1
4	69526566	rs144201564	C	T	0.6419	0.0408	0.0074	3.38e-08	intronic	UGT2B15
4	70424185	rs190794310	T	A	1.135	-0.0889	0.0161	3.41e-08	intergenic	UGT2B4, UGT2A1
4	70508869	rs7690649	T	C	1.1196	-0.038	0.0069	3.42e-08	intronic	UGT2A1
16	89119037	rs73262119	C	T	0.9164	0.1095	0.0198	3.42e-08	intergenic	CBFA2T3, ACSF3
7	66108149	chr7:66108149:D	CCA	C	1.0394	0.0322	0.0058	3.43e-08
7	66128132	rs1961155	C	A	1.1173	0.0299	0.0054	3.43e-08	intergenic	KCTD7, RABGEF1
15	36611423	rs115373470	A	G	0.8215	-0.1385	0.025	3.45e-08	intergenic	MIR4510, C15orf41
4	73609026	rs1481108	T	C	1.2841	-0.0597	0.0108	3.46e-08	intergenic	ADAMTS3, COX18
15	36611994	rs149383159	A	G	0.822	-0.1386	0.025	3.46e-08	intergenic	MIR4510, C15orf41
4	73608342	rs58459976	C	G	1.2813	-0.0597	0.0108	3.51e-08	intergenic	ADAMTS3, COX18
7	66223461	rs3800812	T	C	1.1162	-0.0301	0.0054	3.51e-08	intronic	RABGEF1
4	73607372	rs10518109	T	C	1.2805	-0.0597	0.0108	3.56e-08	intergenic	ADAMTS3, COX18
4	73606345	rs72864490	A	G	1.2794	-0.0597	0.0108	3.57e-08	intergenic	ADAMTS3, COX18
15	97454880	rs60283548	C	T	1.062	-0.1327	0.024	3.57e-08	intergenic	SPATA8, LINC00923
4	73606610	rs7688037	G	C	1.2797	-0.0597	0.0108	3.58e-08	intergenic	ADAMTS3, COX18
7	66242729	rs4718403	C	G	1.1243	-0.0296	0.0054	3.59e-08	intronic	RABGEF1
4	70441955	rs6849712	T	G	1.0577	-0.1133	0.0205	3.61e-08	intergenic	UGT2B4, UGT2A1
4	73602178	rs4318622	A	C	1.2762	-0.0597	0.0108	3.61e-08	intergenic	ADAMTS3, COX18
4	73603329	rs74660403	G	C	1.277	-0.0597	0.0108	3.63e-08	intergenic	ADAMTS3, COX18
4	73605908	rs59105827	T	C	1.2789	-0.0597	0.0108	3.66e-08	intergenic	ADAMTS3, COX18
4	73605330	rs16848549	G	A	1.2785	-0.0597	0.0108	3.67e-08	intergenic	ADAMTS3, COX18
4	73603819	rs60458095	A	G	1.2776	-0.0596	0.0108	3.69e-08	intergenic	ADAMTS3, COX18
4	70416266	rs11942809	G	T	1.1332	-0.0889	0.0161	3.7e-08	intergenic	UGT2B4, UGT2A1
4	73604345	rs58549205	A	C	1.2778	-0.0596	0.0108	3.7e-08	intergenic	ADAMTS3, COX18
7	66198684	chr7:66198684:I	C	CA	1.1018	-0.03	0.0054	3.72e-08	intergenic	KCTD7, RABGEF1
15	59747310	rs113839352	G	T	0.9359	-0.137	0.0248	3.72e-08	intronic	FAM81A
7	66207692	rs2707822	G	C	1.126	-0.0296	0.0054	3.73e-08	intronic	RABGEF1
4	66658095	rs6551958	G	A	1.1286	0.0823	0.0149	3.74e-08	intergenic	LOC100144602, CENPC
7	66084740	rs6460308	T	C	1.1026	0.03	0.0054	3.75e-08	intergenic	LOC493754, KCTD7
4	73603351	rs111872954	C	G	1.2754	-0.0597	0.0108	3.76e-08	intergenic	ADAMTS3, COX18
4	66653822	rs4569801	A	G	1.1288	0.0823	0.0149	3.79e-08	intergenic	LOC100144602, CENPC
4	70366972	rs115163219	G	A	0.9297	-0.0719	0.013	3.81e-08	intergenic	UGT2B4, UGT2A1
14	63069734	rs78884154	G	A	0.965	-0.1082	0.0196	3.83e-08	intergenic	LINC00644, KCNH5
12	7996130	chr12:7996130:D	AC	A	0.9222	0.061	0.0111	3.88e-08
14	80649325	rs8016453	C	T	1.0777	-0.0935	0.017	3.88e-08	intergenic	NRXN3, DIO2
7	66053465	rs11765356	T	A	1.123	0.0296	0.0054	3.9e-08	intergenic	LOC493754, KCTD7
19	43933085	rs9636128	T	C	1.1398	0.0341	0.0062	3.91e-08	intergenic	TEX101, LYPD3
19	43933725	rs34705275	A	C	1.158	0.0337	0.0061	3.91e-08	intergenic	TEX101, LYPD3
4	71481339	rs28705174	A	T	1.2561	-0.0535	0.0097	3.92e-08	intergenic	AMBN, ENAM
7	66204593	rs2707852	A	G	1.1077	-0.0298	0.0054	3.95e-08	intergenic	KCTD7, RABGEF1
4	66659084	rs10050173	A	T	1.129	0.0821	0.0149	3.98e-08	intergenic	LOC100144602, CENPC
7	66225758	chr7:66225758:I	T	TC	1.1242	-0.0295	0.0054	4e-08	intronic	RABGEF1
4	70409920	rs11249445	A	G	1.0085	0.0875	0.0159	4.01e-08	intergenic	UGT2B4, UGT2A1
19	43932403	rs10409143	G	C	1.1214	0.0332	0.006	4.02e-08	intergenic	TEX101, LYPD3
7	66151453	rs6958520	T	C	1.1254	-0.0295	0.0054	4.04e-08	intergenic	KCTD7, RABGEF1
4	67111778	rs10010770	C	G	1.0552	0.0808	0.0147	4.1e-08	intergenic	LOC100144602, CENPC
7	66207148	rs77774720	C	A	1.1118	-0.0297	0.0054	4.13e-08	intronic	RABGEF1
4	66666897	chr4:66666897:I	G	GAAT	1.1052	0.0773	0.0141	4.15e-08	intergenic	LOC100144602, CENPC
19	43933163	rs9636131	A	C	1.1484	0.0339	0.0062	4.18e-08	intergenic	TEX101, LYPD3
19	43933152	rs9636130	G	A	1.1484	0.0339	0.0062	4.21e-08	intergenic	TEX101, LYPD3
16	14259642	rs77858039	A	C	1.0808	-0.098	0.0178	4.3e-08	intronic	MKL2
7	66029234	chr7:66029234:D	CTA	C	0.9822	0.03	0.0055	4.31e-08
4	70365913	rs2642873	C	T	1.132	0.0877	0.0159	4.32e-08	intergenic	UGT2B4, UGT2A1
4	70339232	rs72848429	T	C	1.0822	-0.101	0.0184	4.51e-08	intergenic	UGT2B28, UGT2B4
4	73596970	rs150363882	T	G	1.2488	-0.0596	0.0109	4.53e-08	intergenic	ADAMTS3, COX18
4	70178870	rs148129466	G	A	0.4912	-0.1709	0.0311	4.58e-08	intergenic	UGT2B28, UGT2B4
7	3793814	rs28650199	G	A	1.254	-0.0674	0.0123	4.66e-08	intronic	SDK1
7	66161790	rs7779971	T	C	1.1275	-0.0294	0.0054	4.66e-08	intergenic	KCTD7, RABGEF1
7	66124526	rs6949912	G	A	1.0875	0.0299	0.0055	4.67e-08	intergenic	KCTD7, RABGEF1
9	87841601	rs10117974	G	A	1.0505	-0.0926	0.0169	4.69e-08	intergenic	NTRK2, AGTPBP1
4	70402056	rs2217586	G	T	1.1351	0.0849	0.0155	4.7e-08	intergenic	UGT2B4, UGT2A1
12	52509294	rs149621756	C	T	1.1037	0.0843	0.0154	4.72e-08	intergenic	C12orf44, KRT80
7	3810469	rs2214843	A	G	1.2734	-0.0655	0.012	4.79e-08	intronic	SDK1
4	69821738	rs115824738	T	G	1.0591	0.03	0.0055	4.84e-08	intergenic	UGT2A3, UGT2B7
4	69656078	rs115823582	C	T	1.0637	0.0524	0.0096	4.9e-08	intergenic	UGT2B15, UGT2B10
4	67670634	rs1450028	A	G	1.2502	0.0665	0.0122	4.96e-08	intergenic	LOC100144602, CENPC
7	65466565	rs13307167	C	T	1.18	-0.0305	0.0056	4.97e-08
5	76289584	rs141056041	G	A	0.7282	-0.1606	0.0294	4.98e-08	intergenic	CRHBP, AGGF1
