# Supplementary material for: The Contribution of Common Genetic Variation to Nicotine and Cotinine Glucuronidation in Multiple Ethnic/Racial Populations
Source: Oxford University Press journal article supplement (doi:10.1158/1055-9965.epi-14-0815), 2014-10-08
Supplement: 10559965epi140815-sup-134771_1_supp_2653861_nbpz0z.xls [file 10559965epi140815-sup-134771_1_supp_2653861_nbpz0z.xls]

## Sheet: Supplemental_Table2_062014
Supplemental Table S2: List of 492 globally significant associations (p < 5x10-8) for nicotine glucuronidation
CHR	BP	SNP	A1	A2	INFO	BETA	SE	P	TYPE	GENE
4	69685772	rs116224959	G	A	1.1324	0.1193	0.0085	2.563e-43	intronic	UGT2B10
4	69673553	rs115765562	C	A	1.1377	0.1187	0.0085	6.79e-43	intergenic	UGT2B15, UGT2B10
4	69682555	rs115443755	G	A	1.1359	0.1188	0.0085	6.811e-43	intronic	UGT2B10
4	69686221	rs835317	G	T	1.1372	0.1185	0.0085	7.755e-43
4	69680933	rs114247160	C	T	1.1358	0.1186	0.0085	1.106e-42	upstream	UGT2B10
4	69675177	rs116367243	T	A	1.1341	0.1189	0.0085	1.165e-42	intergenic	UGT2B15, UGT2B10
4	69682855	rs116010004	T	G	1.13	0.1176	0.0085	4.046e-42	intronic	UGT2B10
4	69619887	rs115232263	C	A	1.0711	-0.1009	0.0082	1.087e-33	intergenic	UGT2B15, UGT2B10
4	69669216	rs141360540	G	A	0.9535	-0.1115	0.0094	2.804e-31	intergenic	UGT2B15, UGT2B10
4	69669183	rs146596079	T	C	0.954	-0.1066	0.0092	5.464e-30	intergenic	UGT2B15, UGT2B10
4	69681675	rs146998169	A	T	0.9273	0.092	0.0081	4.911e-29	upstream	UGT2B10
4	69666984	rs114204995	T	A	1.0792	0.0784	0.007	4.22e-28	intergenic	UGT2B15, UGT2B10
4	69666382	rs116305335	C	T	1.0793	0.0784	0.007	4.478e-28	intergenic	UGT2B15, UGT2B10
4	69662451	rs114898162	C	T	1.0806	0.0778	0.007	1.118e-27	intergenic	UGT2B15, UGT2B10
4	69642621	rs116557783	T	C	1.085	-0.0775	0.007	1.405e-27	intergenic	UGT2B15, UGT2B10
4	69649428	rs115761002	T	A	1.0842	-0.0772	0.007	2.343e-27	intergenic	UGT2B15, UGT2B10
4	69646608	rs115456036	C	T	1.0843	-0.0772	0.007	2.51e-27	intergenic	UGT2B15, UGT2B10
4	69687964	rs861340	G	A	1.0975	0.0764	0.0071	1.423e-26
4	69685853	rs835316	G	A	1.0962	0.076	0.0071	3.53e-26
4	69682629	rs114617157	A	G	1.0937	0.076	0.0071	3.945e-26	intronic	UGT2B10
4	69678373	rs115880803	C	G	1.0962	0.0759	0.0071	3.957e-26	intergenic	UGT2B15, UGT2B10
4	69684121	rs844342	G	T	1.0971	0.076	0.0071	3.96e-26
4	69678079	chr4:69678079:I	C	CT	1.084	0.0754	0.0071	6.312e-26	intergenic	UGT2B15, UGT2B10
4	69678161	rs115183376	G	T	1.0901	0.0754	0.0071	9.481e-26	intergenic	UGT2B15, UGT2B10
4	69655555	rs114664732	A	G	1.0783	-0.0746	0.007	1.014e-25	intergenic	UGT2B15, UGT2B10
4	69662832	rs116143572	G	C	1.0782	0.0742	0.007	1.548e-25	intergenic	UGT2B15, UGT2B10
4	69669270	rs114710085	C	T	0.9366	-0.1034	0.0098	1.681e-25	intergenic	UGT2B15, UGT2B10
4	69673556	rs114730236	G	A	1.0048	0.0733	0.0071	2.267e-24	intergenic	UGT2B15, UGT2B10
4	69673557	rs116586853	A	T	1.0048	0.0733	0.0071	2.267e-24	intergenic	UGT2B15, UGT2B10
4	69689122	rs138132853	C	G	1.1287	0.0989	0.0099	3.481e-23	intronic	UGT2B10
4	69687987	rs116294140	C	A	1.1234	0.1055	0.0105	4.606e-23	splicing	UGT2B10
4	69686425	rs835319	G	A	1.1411	0.1047	0.0105	4.684e-23
4	69677744	chr4:69677744:I	C	CTT	1.1508	0.1036	0.0104	4.87e-23	intergenic	UGT2B15, UGT2B10
4	69685482	rs114178203	A	G	1.1451	0.1039	0.0105	8.896e-23	intronic	UGT2B10
4	69680826	chr4:69680826:D	AAATG	A	1.1424	0.104	0.0105	9.673e-23
4	69673775	rs294768	A	C	1.1558	0.1031	0.0104	1.108e-22
4	69673123	rs114061210	A	G	1.1547	0.1031	0.0104	1.261e-22	intergenic	UGT2B15, UGT2B10
4	69686282	rs115814261	G	A	1.1411	0.1032	0.0105	1.948e-22	intronic	UGT2B10
4	69685048	rs116691621	T	A	1.1441	0.1026	0.0105	3.154e-22	intronic	UGT2B10
4	69679220	rs114818997	T	A	1.1436	0.1026	0.0105	3.33e-22	intergenic	UGT2B15, UGT2B10
4	69673113	rs114863460	C	T	1.136	0.0993	0.0104	2.642e-21	intergenic	UGT2B15, UGT2B10
4	69672068	rs115480801	G	A	0.9485	-0.1421	0.0149	3.886e-21	intergenic	UGT2B15, UGT2B10
4	69729815	rs116445309	T	A	0.9928	-0.1241	0.013	4e-21	intergenic	UGT2B10, UGT2A3
4	69672126	rs144102461	T	A	0.941	-0.1428	0.015	5.376e-21	intergenic	UGT2B15, UGT2B10
4	69671064	rs115745146	T	C	1.1431	0.0995	0.0105	6.132e-21	intergenic	UGT2B15, UGT2B10
4	69672251	rs114730872	A	G	0.9693	-0.1362	0.0144	6.378e-21	intergenic	UGT2B15, UGT2B10
4	69670886	rs114639233	T	C	0.9725	-0.1361	0.0144	6.501e-21	intergenic	UGT2B15, UGT2B10
4	69753685	rs115815311	G	A	0.9874	-0.1232	0.013	6.625e-21	intergenic	UGT2B10, UGT2A3
4	69755206	rs116379644	A	C	0.9874	-0.1232	0.013	6.625e-21	intergenic	UGT2B10, UGT2A3
4	69672745	rs116339858	C	T	0.9668	-0.1362	0.0144	6.866e-21	intergenic	UGT2B15, UGT2B10
4	69678450	rs114477351	T	C	1.1479	0.0986	0.0105	1.008e-20	intergenic	UGT2B15, UGT2B10
4	69769999	rs116192600	C	G	0.9603	-0.1363	0.0145	1.226e-20	intergenic	UGT2B10, UGT2A3
4	69675084	rs115038978	G	C	0.9651	-0.1347	0.0143	1.313e-20	intergenic	UGT2B15, UGT2B10
4	69675326	rs114521961	C	G	0.9652	-0.1345	0.0143	1.49e-20	intergenic	UGT2B15, UGT2B10
4	69675510	rs115163082	C	G	0.9649	-0.1344	0.0143	1.505e-20	intergenic	UGT2B15, UGT2B10
4	69671302	rs11737672	T	C	0.9742	-0.1351	0.0144	1.584e-20
4	69682795	rs116533103	G	A	0.9675	-0.1315	0.014	1.648e-20	intronic	UGT2B10
4	69681619	rs140431502	C	T	0.9359	-0.1302	0.0139	1.925e-20	upstream	UGT2B10
4	69759101	rs116380956	A	G	0.9834	-0.1209	0.0129	2.101e-20	intergenic	UGT2B10, UGT2A3
4	69769087	rs113996790	C	T	0.9614	-0.1353	0.0145	2.351e-20	intergenic	UGT2B10, UGT2A3
4	69677759	rs115232947	G	A	0.9653	-0.1335	0.0143	2.39e-20	intergenic	UGT2B15, UGT2B10
4	69678128	rs115796823	C	G	0.9655	-0.1334	0.0143	2.546e-20	intergenic	UGT2B15, UGT2B10
4	69670995	chr4:69670995:I	T	TGCTCCCA	0.9654	-0.1359	0.0146	2.687e-20	intergenic	UGT2B15, UGT2B10
4	69767349	rs116446865	T	C	0.9662	-0.1287	0.0138	3.118e-20	intergenic	UGT2B10, UGT2A3
4	69679748	rs141926198	G	A	0.9671	-0.1327	0.0143	3.248e-20	intergenic	UGT2B15, UGT2B10
4	69768638	rs116023959	G	T	0.9649	-0.1353	0.0146	3.28e-20	intergenic	UGT2B10, UGT2A3
4	69749535	chr4:69749535:D	TG	T	0.9551	-0.1379	0.0148	3.284e-20
4	69749537	chr4:69749537:D	TA	T	0.9551	-0.1379	0.0148	3.284e-20
4	69673555	chr4:69673555:I	A	AAT	0.897	0.0674	0.0073	3.361e-20	intergenic	UGT2B15, UGT2B10
4	69611058	rs115214611	C	T	1.0838	-0.0895	0.0097	4.092e-20	intergenic	UGT2B15, UGT2B10
4	69742722	rs115612883	A	G	0.97	-0.1343	0.0145	5.5e-20	intergenic	UGT2B10, UGT2A3
4	69681848	rs138956169	T	C	0.9687	-0.1307	0.0142	5.844e-20	synonymous	UGT2B10
4	69681936	rs144647471	G	T	0.9687	-0.1307	0.0142	5.844e-20	nonsynonymous missense	UGT2B10
4	69682509	rs114874096	A	G	0.9688	-0.1307	0.0142	5.995e-20	intronic	UGT2B10
4	69683636	rs114993422	G	A	0.9678	-0.1309	0.0142	6.031e-20	intronic	UGT2B10
4	69688962	rs141925749	G	A	0.965	-0.1205	0.013	6.046e-20	intronic	UGT2B10
4	69682690	rs150713743	A	G	0.9692	-0.131	0.0142	6.066e-20	intronic	UGT2B10
4	69684923	rs140646937	T	C	0.9692	-0.1309	0.0142	6.229e-20	intronic	UGT2B10
4	69678943	rs116511001	G	T	0.9628	-0.1317	0.0143	6.719e-20	intergenic	UGT2B15, UGT2B10
4	69752439	rs115970480	C	T	0.9713	-0.134	0.0145	6.815e-20	intergenic	UGT2B10, UGT2A3
4	69761131	rs114441621	T	C	0.9713	-0.134	0.0145	6.815e-20	intergenic	UGT2B10, UGT2A3
4	69678764	rs114375522	T	A	0.964	-0.1315	0.0143	6.855e-20	intergenic	UGT2B15, UGT2B10
4	69735877	rs113997869	C	T	0.974	-0.1335	0.0145	7.225e-20	intergenic	UGT2B10, UGT2A3
4	69607530	chr4:69607530:D	AC	A	0.921	-0.1229	0.0133	7.313e-20
4	69607021	rs115577600	A	G	0.9801	-0.131	0.0143	8.856e-20	intergenic	UGT2B15, UGT2B10
4	69606897	rs114276393	G	T	0.98	-0.131	0.0143	8.918e-20	intergenic	UGT2B15, UGT2B10
4	69607610	rs115620203	A	T	0.9802	-0.131	0.0143	9.073e-20	intergenic	UGT2B15, UGT2B10
4	69612658	rs114722783	G	A	0.9811	-0.1309	0.0143	9.174e-20	intergenic	UGT2B15, UGT2B10
4	69612963	rs116429127	T	A	0.9811	-0.1309	0.0143	9.174e-20	intergenic	UGT2B15, UGT2B10
4	69614293	rs114413515	C	T	0.9816	-0.1308	0.0142	9.424e-20	intergenic	UGT2B15, UGT2B10
4	69754283	rs115166258	G	A	0.9757	-0.1238	0.0135	9.43e-20	intergenic	UGT2B10, UGT2A3
4	69613227	rs114108676	T	A	0.9813	-0.1308	0.0142	9.467e-20	intergenic	UGT2B15, UGT2B10
4	69617561	rs116181568	T	A	0.9823	-0.1308	0.0142	9.659e-20	intergenic	UGT2B15, UGT2B10
4	69616791	rs115568501	G	A	0.9821	-0.1308	0.0142	9.705e-20	intergenic	UGT2B15, UGT2B10
4	69612556	rs139454689	T	C	0.9807	-0.1308	0.0143	9.709e-20	intergenic	UGT2B15, UGT2B10
4	69603602	rs115474343	A	G	0.9783	-0.131	0.0143	9.942e-20	intergenic	UGT2B15, UGT2B10
4	69623839	chr4:69623839:D	TC	T	0.9835	-0.1306	0.0142	1.024e-19
4	69625413	rs116829614	G	C	0.9835	-0.1306	0.0142	1.024e-19	intergenic	UGT2B15, UGT2B10
4	69625414	rs11731269	G	A	0.9835	-0.1306	0.0142	1.024e-19
4	69680942	rs116625312	A	T	0.9547	-0.1329	0.0145	1.33e-19	upstream	UGT2B10
4	69721662	rs115319921	T	C	0.9755	-0.1326	0.0145	1.403e-19	intergenic	UGT2B10, UGT2A3
4	69725113	rs115542835	G	T	0.9755	-0.1326	0.0145	1.403e-19	intergenic	UGT2B10, UGT2A3
4	69685752	rs115258821	A	C	0.9665	-0.1295	0.0142	1.508e-19	intronic	UGT2B10
4	69671235	rs116467558	G	C	1.2007	0.0936	0.0102	1.518e-19	intergenic	UGT2B15, UGT2B10
4	69686381	rs116031106	G	A	0.9666	-0.1294	0.0142	1.547e-19	intronic	UGT2B10
4	69760471	rs114014249	A	G	0.9769	-0.1231	0.0135	1.575e-19	intergenic	UGT2B10, UGT2A3
4	69686676	rs115759958	A	G	0.9665	-0.1294	0.0142	1.599e-19	intronic	UGT2B10
4	69686975	rs114714824	T	C	0.9663	-0.1294	0.0142	1.63e-19	intronic	UGT2B10
4	69687214	rs116007193	T	C	0.9605	-0.1302	0.0143	1.679e-19	intronic	UGT2B10
4	69687619	rs144238031	C	T	0.966	-0.1293	0.0142	1.822e-19	intronic	UGT2B10
4	69688125	rs146889061	G	T	0.965	-0.1293	0.0142	1.928e-19	intronic	UGT2B10
4	69749552	rs139784893	G	A	0.9457	-0.1374	0.0151	2.046e-19	intergenic	UGT2B10, UGT2A3
4	69680943	rs114097237	A	T	0.9473	-0.1321	0.0145	2.089e-19	upstream	UGT2B10
4	69669603	rs114754935	C	A	0.9952	-0.1139	0.0126	3.063e-19	intergenic	UGT2B15, UGT2B10
4	69605624	rs192801605	G	A	0.8736	-0.0883	0.0098	3.339e-19	intergenic	UGT2B15, UGT2B10
4	69717968	rs188560849	C	A	0.9629	-0.1344	0.0149	3.422e-19	intergenic	UGT2B10, UGT2A3
4	69717969	rs192169379	A	T	0.9629	-0.1344	0.0149	3.422e-19	intergenic	UGT2B10, UGT2A3
4	69724935	rs114373813	A	G	0.9629	-0.1344	0.0149	3.422e-19	intergenic	UGT2B10, UGT2A3
4	69683953	rs114828297	G	C	1.1883	0.0931	0.0103	3.471e-19	intronic	UGT2B10
4	69684338	chr4:69684338:D	GA	G	1.0768	0.0948	0.0105	3.625e-19
4	69717641	rs116115181	C	T	0.9725	-0.131	0.0145	3.798e-19	intergenic	UGT2B10, UGT2A3
4	69710615	rs115102804	G	T	0.9721	-0.1309	0.0145	4.09e-19	intergenic	UGT2B10, UGT2A3
4	69766993	rs114126014	T	C	0.9635	-0.1297	0.0144	4.806e-19	intergenic	UGT2B10, UGT2A3
4	69740155	rs116018225	C	T	0.965	-0.1293	0.0144	5.533e-19	intergenic	UGT2B10, UGT2A3
4	69765782	rs115558925	A	C	0.9654	-0.1293	0.0144	6.059e-19	intergenic	UGT2B10, UGT2A3
4	69739411	rs114473265	T	C	0.9662	-0.1292	0.0144	6.125e-19	intergenic	UGT2B10, UGT2A3
4	69765842	chr4:69765842:D	CA	C	0.9577	-0.1312	0.0146	6.365e-19
4	69745127	rs115293372	T	C	0.9669	-0.129	0.0144	7.078e-19	intergenic	UGT2B10, UGT2A3
4	69750117	rs116221291	T	C	0.9674	-0.1289	0.0144	7.598e-19	intergenic	UGT2B10, UGT2A3
4	69669268	rs151231285	C	T	0.9746	-0.1326	0.0148	7.822e-19	intergenic	UGT2B15, UGT2B10
4	69759351	rs115707640	C	T	0.9678	-0.1288	0.0144	7.926e-19	intergenic	UGT2B10, UGT2A3
4	69751951	rs115549616	C	G	0.9677	-0.1288	0.0144	7.942e-19	intergenic	UGT2B10, UGT2A3
4	69619529	chr4:69619529:D	AC	A	0.9532	-0.126	0.0141	1.04e-18
4	69642265	rs115485831	A	T	1.0061	-0.0672	0.0076	1.09e-18	intergenic	UGT2B15, UGT2B10
4	69659833	rs113999752	C	A	1	-0.0673	0.0076	1.178e-18	intergenic	UGT2B15, UGT2B10
4	69669388	rs115219551	A	G	0.8903	-0.0668	0.0075	1.194e-18	intergenic	UGT2B15, UGT2B10
4	69664301	rs140205714	T	G	1.0048	-0.0672	0.0076	1.256e-18	intergenic	UGT2B15, UGT2B10
4	69663476	rs114057562	G	A	1.0047	-0.0672	0.0076	1.264e-18	intergenic	UGT2B15, UGT2B10
4	69663632	rs115651349	G	A	1.0047	-0.0672	0.0076	1.292e-18	intergenic	UGT2B15, UGT2B10
4	69735957	rs150405933	C	T	0.9649	-0.125	0.0141	1.303e-18	intergenic	UGT2B10, UGT2A3
4	69661615	rs113444800	A	G	1.0046	-0.0672	0.0076	1.328e-18	intergenic	UGT2B15, UGT2B10
4	69659738	rs115097835	C	T	1.0047	-0.0671	0.0076	1.335e-18	intergenic	UGT2B15, UGT2B10
4	69658879	rs116001863	T	C	1.0047	-0.0671	0.0076	1.375e-18	intergenic	UGT2B15, UGT2B10
4	69656777	rs115553258	G	A	1.0046	-0.0671	0.0076	1.427e-18	intergenic	UGT2B15, UGT2B10
4	69625607	rs112493252	C	T	0.9502	-0.137	0.0155	1.526e-18	intergenic	UGT2B15, UGT2B10
4	69692608	rs114001254	A	T	0.9518	-0.1285	0.0145	1.547e-18	intronic	UGT2B10
4	69698380	rs115763151	G	T	0.9539	-0.1282	0.0145	1.647e-18	downstream	UGT2B10
4	69610144	rs113042441	T	C	0.9774	-0.1319	0.0149	1.864e-18	intergenic	UGT2B15, UGT2B10
4	69619452	rs112010479	G	A	0.9784	-0.1319	0.0149	1.875e-18	intergenic	UGT2B15, UGT2B10
4	69612332	rs113821880	C	T	0.9776	-0.1319	0.0149	1.888e-18	intergenic	UGT2B15, UGT2B10
4	69612801	rs116764105	G	A	0.9776	-0.1319	0.0149	1.888e-18	intergenic	UGT2B15, UGT2B10
4	69613181	rs116108091	T	G	0.9776	-0.1319	0.0149	1.888e-18	intergenic	UGT2B15, UGT2B10
4	69622812	rs115749265	C	A	0.9787	-0.1318	0.0149	1.892e-18	intergenic	UGT2B15, UGT2B10
4	69621010	rs116134160	C	T	0.9786	-0.1318	0.0149	1.9e-18	intergenic	UGT2B15, UGT2B10
4	69614157	rs112831907	G	A	0.9777	-0.1319	0.0149	1.904e-18	intergenic	UGT2B15, UGT2B10
4	69609345	rs114526018	G	T	0.9771	-0.1319	0.0149	1.907e-18	intergenic	UGT2B15, UGT2B10
4	69629705	rs114369716	T	A	0.9785	-0.1318	0.0149	1.928e-18	intergenic	UGT2B15, UGT2B10
4	69631428	rs115703809	G	A	0.9785	-0.1318	0.0149	1.928e-18	intergenic	UGT2B15, UGT2B10
4	69632394	rs116592574	C	T	0.9785	-0.1318	0.0149	1.928e-18	intergenic	UGT2B15, UGT2B10
4	69707693	rs116011053	C	A	0.9731	-0.1269	0.0144	1.93e-18	intergenic	UGT2B10, UGT2A3
4	69607124	rs115116836	G	A	0.9769	-0.1319	0.0149	1.938e-18	intergenic	UGT2B15, UGT2B10
4	69634240	rs145469425	C	T	0.9784	-0.1318	0.0149	1.961e-18	intergenic	UGT2B15, UGT2B10
4	69669990	rs116164018	C	G	0.9782	-0.1318	0.0149	1.983e-18	intergenic	UGT2B15, UGT2B10
4	69637632	rs143331934	T	C	0.978	-0.1317	0.0149	2.103e-18	intergenic	UGT2B15, UGT2B10
4	69639160	rs115292483	C	T	0.9779	-0.1317	0.0149	2.141e-18	intergenic	UGT2B15, UGT2B10
4	69668520	rs115968327	G	A	0.9776	-0.1317	0.0149	2.19e-18	intergenic	UGT2B15, UGT2B10
4	69647536	rs114970731	A	G	1.0033	-0.0668	0.0076	2.221e-18	intergenic	UGT2B15, UGT2B10
4	69659773	rs116135845	A	G	0.9772	-0.1311	0.0149	3.42e-18	intergenic	UGT2B15, UGT2B10
4	69627634	rs111326963	C	A	1.1504	-0.0841	0.0096	3.966e-18	intergenic	UGT2B15, UGT2B10
4	69654056	rs115920747	C	A	0.9778	-0.1307	0.015	4.566e-18	intergenic	UGT2B15, UGT2B10
4	69642982	rs115363606	C	T	0.9784	-0.1305	0.015	4.841e-18	intergenic	UGT2B15, UGT2B10
4	69643921	rs114636474	G	A	0.9785	-0.1305	0.015	4.969e-18	intergenic	UGT2B15, UGT2B10
4	69652560	rs115250354	G	T	0.9782	-0.1305	0.015	5.059e-18	intergenic	UGT2B15, UGT2B10
4	69619618	rs113923277	G	A	0.9559	-0.1295	0.0149	5.341e-18	intergenic	UGT2B15, UGT2B10
4	69649509	rs116134381	C	A	0.9787	-0.1304	0.015	5.366e-18	intergenic	UGT2B15, UGT2B10
4	69627697	rs113284913	C	A	1.1528	-0.0831	0.0096	1.071e-17	intergenic	UGT2B15, UGT2B10
4	69639151	rs141084263	G	A	1.1532	-0.0828	0.0096	1.581e-17	intergenic	UGT2B15, UGT2B10
4	69638282	rs114911966	G	A	1.1531	-0.0828	0.0096	1.598e-17	intergenic	UGT2B15, UGT2B10
4	69636366	rs140048689	C	A	1.1529	-0.0827	0.0096	1.639e-17	intergenic	UGT2B15, UGT2B10
4	69635056	rs139408548	T	A	1.1529	-0.0827	0.0096	1.686e-17	intergenic	UGT2B15, UGT2B10
4	69636291	rs183152907	T	C	1.1479	-0.0825	0.0097	2.347e-17	intergenic	UGT2B15, UGT2B10
4	69650838	chr4:69650838:D	CAAT	C	0.9659	-0.1297	0.0152	2.733e-17
4	69647347	rs61750900	T	G	1.1099	0.1092	0.0128	3.344e-17	nonsynonymous missense	UGT2B10
4	69650840	chr4:69650840:D	ATAAT	A	0.9595	-0.1299	0.0153	4.325e-17
4	69701338	rs11737644	T	C	1.0144	-0.1182	0.014	6.444e-17
4	69746647	rs114612145	A	G	1.0342	-0.0979	0.012	4.663e-16	intergenic	UGT2B10, UGT2A3
4	69746875	rs116692755	C	G	1.0343	-0.0978	0.012	4.769e-16	intergenic	UGT2B10, UGT2A3
4	69687689	rs115094696	G	T	1.0102	-0.0969	0.012	1.203e-15	intronic	UGT2B10
4	69670073	rs138998181	C	T	1.0606	0.0602	0.0075	1.649e-15	intergenic	UGT2B15, UGT2B10
4	69631265	chr4:69631265:I	G	GA	1.1133	-0.0772	0.0097	2.323e-15	intergenic	UGT2B15, UGT2B10
4	69670179	rs115442155	A	G	1.0103	0.06	0.0075	2.423e-15	intergenic	UGT2B15, UGT2B10
4	69670507	rs114710642	A	G	1.1264	0.077	0.0097	2.719e-15	intergenic	UGT2B15, UGT2B10
4	69685965	rs114587479	T	C	1.0113	-0.0944	0.0121	1.064e-14	intronic	UGT2B10
4	69672097	rs116089398	G	T	0.8547	0.0563	0.0073	2.142e-14	intergenic	UGT2B15, UGT2B10
4	69681244	rs115619871	C	T	0.9754	-0.0928	0.0121	2.299e-14	upstream	UGT2B10
4	69688430	rs114253128	G	A	0.994	-0.0937	0.0122	2.872e-14	intronic	UGT2B10
4	69676956	rs116585506	T	C	0.9823	-0.0981	0.0129	3.687e-14	intergenic	UGT2B15, UGT2B10
4	69759022	rs115824708	C	A	1.0536	-0.0823	0.0108	3.696e-14	intergenic	UGT2B10, UGT2A3
4	69885683	rs148467728	T	C	0.7956	-0.1662	0.0219	5.258e-14	intergenic	UGT2A3, UGT2B7
4	69771114	rs7681837	C	T	1.0501	-0.0817	0.0108	5.379e-14
4	69930291	rs6827692	A	G	0.7795	0.1681	0.0222	5.405e-14	intergenic	UGT2A3, UGT2B7
4	69895305	rs112120045	C	A	0.7936	-0.166	0.022	5.846e-14	intergenic	UGT2A3, UGT2B7
4	69694073	rs115832004	G	A	0.9751	-0.0973	0.013	1.191e-13	intronic	UGT2B10
4	69739730	rs116605561	A	C	1.0486	-0.0809	0.0109	1.462e-13	intergenic	UGT2B10, UGT2A3
4	69673415	rs115985945	G	A	0.9585	-0.1471	0.0198	1.538e-13	intergenic	UGT2B15, UGT2B10
4	69741799	rs116052796	G	T	1.0478	-0.0808	0.0109	1.667e-13	intergenic	UGT2B10, UGT2A3
4	69743225	rs149163214	A	C	1.0477	-0.0807	0.0109	1.713e-13	intergenic	UGT2B10, UGT2A3
4	69605178	chr4:69605178:I	G	GT	1.0422	-0.0486	0.0066	1.856e-13	intergenic	UGT2B15, UGT2B10
4	69755998	rs115069780	G	A	1.0451	-0.0806	0.0109	1.991e-13	intergenic	UGT2B10, UGT2A3
4	69644798	rs115860183	G	A	0.9725	-0.0911	0.0123	2.072e-13	intergenic	UGT2B15, UGT2B10
4	69766443	rs114742135	A	T	1.0461	-0.0805	0.0109	2.232e-13	intergenic	UGT2B10, UGT2A3
4	69601886	chr4:69601886:D	TC	T	1.0017	-0.0946	0.0128	2.258e-13
4	69766364	rs115835349	C	T	1.0463	-0.0804	0.0109	2.308e-13	intergenic	UGT2B10, UGT2A3
4	69766119	rs114826126	A	T	1.0303	-0.0814	0.011	2.383e-13	intergenic	UGT2B10, UGT2A3
4	69880238	rs115199149	G	A	0.7516	-0.1668	0.0227	2.54e-13	intergenic	UGT2A3, UGT2B7
4	69761239	rs115527001	A	G	1.0477	-0.0802	0.0109	2.638e-13	intergenic	UGT2B10, UGT2A3
4	69761311	rs114795848	A	G	1.0477	-0.0802	0.0109	2.638e-13	intergenic	UGT2B10, UGT2A3
4	69763910	rs114986615	C	T	1.0478	-0.0802	0.0109	2.672e-13	intergenic	UGT2B10, UGT2A3
4	69763587	rs115202858	G	A	1.0479	-0.0801	0.0109	2.745e-13	intergenic	UGT2B10, UGT2A3
4	69604490	rs115472926	T	C	1.0496	-0.0482	0.0066	3.682e-13	intergenic	UGT2B15, UGT2B10
4	69687610	chr4:69687610:I	G	GA	0.9648	0.066	0.0091	5.138e-13	intronic	UGT2B10
4	69628582	chr4:69628582:I	T	TAGGG	1.0296	-0.0447	0.0062	6.811e-13	intergenic	UGT2B15, UGT2B10
4	69668510	rs116612687	T	C	0.9703	-0.0899	0.0125	7.319e-13	intergenic	UGT2B15, UGT2B10
4	69663547	rs116317320	C	T	0.97	-0.0897	0.0125	8.024e-13	intergenic	UGT2B15, UGT2B10
4	69660834	rs115801223	G	C	0.97	-0.0897	0.0125	8.23e-13	intergenic	UGT2B15, UGT2B10
4	69652756	rs186116289	T	C	0.9704	-0.0896	0.0124	8.236e-13	intergenic	UGT2B15, UGT2B10
4	69771283	rs115600564	C	G	1.006	-0.0831	0.0115	8.279e-13	intergenic	UGT2B10, UGT2A3
4	69771309	rs116515246	A	C	1.006	-0.0831	0.0115	8.279e-13	intergenic	UGT2B10, UGT2A3
4	69771354	rs114546260	T	C	1.006	-0.0831	0.0115	8.279e-13	intergenic	UGT2B10, UGT2A3
4	69660303	rs114136864	C	T	0.97	-0.0897	0.0125	8.302e-13	intergenic	UGT2B15, UGT2B10
4	69657899	rs115377518	C	T	0.9701	-0.0896	0.0125	8.345e-13	intergenic	UGT2B15, UGT2B10
4	69655714	rs115235503	C	T	0.9703	-0.0895	0.0124	8.598e-13	intergenic	UGT2B15, UGT2B10
4	69653514	rs114615110	G	A	0.971	-0.0895	0.0124	8.69e-13	intergenic	UGT2B15, UGT2B10
4	69654408	rs116149014	A	G	0.97	-0.0895	0.0125	8.737e-13	intergenic	UGT2B15, UGT2B10
4	69652573	rs114874870	G	A	0.9711	-0.0894	0.0124	8.8e-13	intergenic	UGT2B15, UGT2B10
4	69651787	chr4:69651787:D	GA	G	0.9711	-0.0894	0.0124	8.9e-13
4	69650293	rs115858476	T	C	0.9714	-0.0894	0.0124	9.05e-13	intergenic	UGT2B15, UGT2B10
4	69667714	rs114972368	C	G	0.9699	-0.0895	0.0125	9.437e-13	intergenic	UGT2B15, UGT2B10
4	69615314	rs115155294	C	T	1.0637	-0.0464	0.0065	9.514e-13	intergenic	UGT2B15, UGT2B10
4	69610450	rs113645682	G	A	1.0564	-0.0469	0.0065	9.77e-13	intergenic	UGT2B15, UGT2B10
4	69645069	rs113999949	G	A	0.9726	-0.0891	0.0124	9.905e-13	intergenic	UGT2B15, UGT2B10
4	69645553	rs116248512	G	A	0.9726	-0.0891	0.0124	9.905e-13	intergenic	UGT2B15, UGT2B10
4	69614042	rs111448156	C	T	1.0592	-0.0467	0.0065	1.028e-12	intergenic	UGT2B15, UGT2B10
4	69652757	chr4:69652757:D	GT	G	0.9691	-0.0888	0.0124	1.197e-12
4	69619813	rs111254231	G	A	1.0642	-0.0462	0.0065	1.266e-12	intergenic	UGT2B15, UGT2B10
4	69642142	rs114576382	C	T	0.9748	-0.0886	0.0124	1.278e-12	intergenic	UGT2B15, UGT2B10
4	69630961	rs117386657	A	G	0.9609	-0.0899	0.0126	1.321e-12	intergenic	UGT2B15, UGT2B10
4	69664536	rs142124595	G	T	0.9679	-0.0888	0.0125	1.35e-12	intergenic	UGT2B15, UGT2B10
4	69621938	rs114999894	G	C	1.0641	-0.0461	0.0065	1.353e-12	intergenic	UGT2B15, UGT2B10
4	69614025	rs113041224	A	G	1.0621	-0.0462	0.0065	1.366e-12	intergenic	UGT2B15, UGT2B10
4	69614059	rs113351212	T	A	1.0632	-0.0462	0.0065	1.381e-12	intergenic	UGT2B15, UGT2B10
4	69623976	rs114121284	G	C	1.0649	-0.0461	0.0065	1.398e-12	intergenic	UGT2B15, UGT2B10
4	69622531	rs115172690	T	G	1.0649	-0.0461	0.0065	1.404e-12	intergenic	UGT2B15, UGT2B10
4	69622658	rs114168134	T	C	1.0649	-0.0461	0.0065	1.404e-12	intergenic	UGT2B15, UGT2B10
4	69624846	rs115100680	C	T	1.0636	-0.0461	0.0065	1.404e-12	intergenic	UGT2B15, UGT2B10
4	69622218	rs116313770	G	C	1.0649	-0.0461	0.0065	1.407e-12	intergenic	UGT2B15, UGT2B10
4	69621964	rs116620928	C	G	1.0649	-0.0461	0.0065	1.408e-12	intergenic	UGT2B15, UGT2B10
4	69621981	rs116003235	A	T	1.0649	-0.0461	0.0065	1.408e-12	intergenic	UGT2B15, UGT2B10
4	69621380	rs116051919	T	G	1.065	-0.0461	0.0065	1.411e-12	intergenic	UGT2B15, UGT2B10
4	69621445	rs114383090	A	G	1.065	-0.0461	0.0065	1.411e-12	intergenic	UGT2B15, UGT2B10
4	69621227	rs115859359	T	A	1.065	-0.0461	0.0065	1.413e-12	intergenic	UGT2B15, UGT2B10
4	69620401	rs115229303	A	G	1.0651	-0.0461	0.0065	1.418e-12	intergenic	UGT2B15, UGT2B10
4	69619917	rs115108742	C	T	1.0651	-0.0461	0.0065	1.421e-12	intergenic	UGT2B15, UGT2B10
4	69619688	rs111774338	A	C	1.0651	-0.0461	0.0065	1.423e-12	intergenic	UGT2B15, UGT2B10
4	69619315	rs116549414	T	C	1.0652	-0.0461	0.0065	1.426e-12	intergenic	UGT2B15, UGT2B10
4	69619339	rs115738802	G	A	1.0652	-0.0461	0.0065	1.426e-12	intergenic	UGT2B15, UGT2B10
4	69619078	rs115414681	C	G	1.0652	-0.0461	0.0065	1.428e-12	intergenic	UGT2B15, UGT2B10
4	69619275	rs114676038	C	G	1.0652	-0.0461	0.0065	1.428e-12	intergenic	UGT2B15, UGT2B10
4	69624312	rs115822916	A	G	1.0648	-0.0461	0.0065	1.432e-12	intergenic	UGT2B15, UGT2B10
4	69618644	rs149773789	G	A	1.0653	-0.0461	0.0065	1.433e-12	intergenic	UGT2B15, UGT2B10
4	69618420	rs115317383	A	C	1.0653	-0.0461	0.0065	1.435e-12	intergenic	UGT2B15, UGT2B10
4	69618237	rs115009294	G	A	1.0653	-0.0461	0.0065	1.437e-12	intergenic	UGT2B15, UGT2B10
4	69651890	rs114317895	A	G	0.9311	-0.0881	0.0124	1.438e-12	intergenic	UGT2B15, UGT2B10
4	69620606	rs114373343	A	T	1.0646	-0.0461	0.0065	1.439e-12	intergenic	UGT2B15, UGT2B10
4	69614282	rs116155553	G	A	1.0585	-0.0463	0.0065	1.442e-12	intergenic	UGT2B15, UGT2B10
4	69613882	rs112599474	C	T	1.0656	-0.0461	0.0065	1.454e-12	intergenic	UGT2B15, UGT2B10
4	69613972	rs112153034	T	A	1.0656	-0.0461	0.0065	1.454e-12	intergenic	UGT2B15, UGT2B10
4	69614431	rs116649821	C	T	1.0656	-0.0461	0.0065	1.454e-12	intergenic	UGT2B15, UGT2B10
4	69614542	rs148060416	C	T	1.0656	-0.0461	0.0065	1.454e-12	intergenic	UGT2B15, UGT2B10
4	69614973	rs115133351	T	G	1.0656	-0.0461	0.0065	1.454e-12	intergenic	UGT2B15, UGT2B10
4	69615068	rs115851158	A	G	1.0656	-0.0461	0.0065	1.454e-12	intergenic	UGT2B15, UGT2B10
4	69615138	rs114048682	G	A	1.0656	-0.0461	0.0065	1.454e-12	intergenic	UGT2B15, UGT2B10
4	69615660	rs115868753	T	C	1.0656	-0.0461	0.0065	1.454e-12	intergenic	UGT2B15, UGT2B10
4	69615741	rs115548723	T	C	1.0656	-0.0461	0.0065	1.454e-12	intergenic	UGT2B15, UGT2B10
4	69615767	rs115419613	C	A	1.0656	-0.0461	0.0065	1.454e-12	intergenic	UGT2B15, UGT2B10
4	69615849	rs114383883	C	T	1.0656	-0.0461	0.0065	1.454e-12	intergenic	UGT2B15, UGT2B10
4	69616140	rs116558634	G	A	1.0656	-0.0461	0.0065	1.454e-12	intergenic	UGT2B15, UGT2B10
4	69616336	rs116525660	G	A	1.0656	-0.0461	0.0065	1.454e-12	intergenic	UGT2B15, UGT2B10
4	69616437	rs116363094	T	C	1.0656	-0.0461	0.0065	1.454e-12	intergenic	UGT2B15, UGT2B10
4	69616575	rs389715	G	A	1.0656	-0.0461	0.0065	1.454e-12
4	69627436	rs113364384	A	G	1.0648	-0.0461	0.0065	1.509e-12	intergenic	UGT2B15, UGT2B10
4	69624642	rs115020720	A	G	1.0648	-0.046	0.0065	1.516e-12	intergenic	UGT2B15, UGT2B10
4	69623496	rs116710191	A	G	1.0573	-0.0462	0.0065	1.517e-12	intergenic	UGT2B15, UGT2B10
4	69949111	rs7436374	G	A	0.8748	0.1008	0.0142	1.519e-12	intergenic	UGT2A3, UGT2B7
4	69627254	rs114475271	T	A	1.0648	-0.046	0.0065	1.52e-12	intergenic	UGT2B15, UGT2B10
4	69627258	rs79310544	T	C	1.0648	-0.046	0.0065	1.52e-12	intergenic	UGT2B15, UGT2B10
4	69624755	rs111689490	T	C	1.0648	-0.046	0.0065	1.542e-12	intergenic	UGT2B15, UGT2B10
4	69624757	rs112374626	G	A	1.0649	-0.046	0.0065	1.555e-12	intergenic	UGT2B15, UGT2B10
4	69624820	rs113247582	A	G	1.0649	-0.046	0.0065	1.568e-12	intergenic	UGT2B15, UGT2B10
4	69636752	rs146423074	C	T	0.9745	-0.0884	0.0124	1.573e-12	intergenic	UGT2B15, UGT2B10
4	69637006	rs143713409	C	A	0.9745	-0.0884	0.0124	1.573e-12	intergenic	UGT2B15, UGT2B10
4	69632988	rs116559190	C	T	0.9743	-0.0884	0.0124	1.596e-12	intergenic	UGT2B15, UGT2B10
4	69605182	chr4:69605182:I	T	TC	1.0697	-0.0457	0.0064	1.618e-12	intergenic	UGT2B15, UGT2B10
4	69626037	rs116353550	A	G	1.0639	-0.0459	0.0065	1.681e-12	intergenic	UGT2B15, UGT2B10
4	69625730	rs115130067	G	A	1.0652	-0.0459	0.0065	1.848e-12	intergenic	UGT2B15, UGT2B10
4	69631870	rs115225050	C	T	0.9729	-0.0881	0.0124	1.855e-12	intergenic	UGT2B15, UGT2B10
4	69770779	rs114237743	G	T	1.0046	-0.0822	0.0116	1.879e-12	intergenic	UGT2B10, UGT2A3
4	69626319	rs115176266	A	G	1.0655	-0.0457	0.0065	2.06e-12	intergenic	UGT2B15, UGT2B10
4	69626404	rs1828705	C	A	1.0656	-0.0457	0.0065	2.099e-12
4	69609990	rs111572083	T	A	1.0622	-0.0456	0.0065	2.323e-12	intergenic	UGT2B15, UGT2B10
4	69611272	rs116053942	G	A	0.9636	-0.0879	0.0125	2.542e-12	intergenic	UGT2B15, UGT2B10
4	69612257	chr4:69612257:D	AC	A	1.0608	-0.0455	0.0065	2.891e-12
4	69641776	rs115120773	C	T	0.9623	-0.0875	0.0125	2.899e-12	intergenic	UGT2B15, UGT2B10
4	69614031	rs116051501	A	C	0.9701	-0.0876	0.0125	3.051e-12	intergenic	UGT2B15, UGT2B10
4	69618019	rs116458816	A	T	0.9706	-0.0876	0.0125	3.051e-12	intergenic	UGT2B15, UGT2B10
4	69619748	rs115684409	A	G	0.971	-0.0875	0.0125	3.13e-12	intergenic	UGT2B15, UGT2B10
4	69609576	rs115197162	A	T	1.0654	-0.0451	0.0064	3.206e-12	intergenic	UGT2B15, UGT2B10
4	69641777	rs115804752	A	G	0.962	-0.0872	0.0125	3.242e-12	intergenic	UGT2B15, UGT2B10
4	69612531	rs138596472	C	T	1.0597	-0.0453	0.0065	3.367e-12	intergenic	UGT2B15, UGT2B10
4	69625505	rs116206615	G	C	1.0599	-0.0454	0.0065	3.552e-12	intergenic	UGT2B15, UGT2B10
4	69612344	rs137960876	C	T	0.9614	-0.0963	0.0138	3.606e-12	intergenic	UGT2B15, UGT2B10
4	69625622	rs142945327	T	C	1.0596	-0.0454	0.0065	3.683e-12	intergenic	UGT2B15, UGT2B10
4	69625628	rs151089786	C	G	1.0596	-0.0454	0.0065	3.683e-12	intergenic	UGT2B15, UGT2B10
4	69611505	rs397678	C	T	1.0654	-0.0451	0.0065	3.687e-12
4	69611769	rs116390686	G	A	1.0654	-0.0451	0.0065	3.687e-12	intergenic	UGT2B15, UGT2B10
4	69613030	rs403552	T	C	1.0654	-0.0451	0.0065	3.687e-12
4	69611220	rs76203808	C	T	1.0654	-0.0451	0.0065	3.706e-12	intergenic	UGT2B15, UGT2B10
4	69611223	rs112784694	A	G	1.0654	-0.0451	0.0065	3.706e-12	intergenic	UGT2B15, UGT2B10
4	69621267	rs116218628	G	A	0.9668	-0.0876	0.0125	3.739e-12	intergenic	UGT2B15, UGT2B10
4	69609924	rs112239062	T	A	1.0659	-0.0451	0.0065	3.77e-12	intergenic	UGT2B15, UGT2B10
4	69611166	chr4:69611166:D	GT	G	1.0623	-0.0451	0.0065	3.789e-12
4	69610704	rs114612059	G	A	1.0657	-0.0451	0.0065	3.796e-12	intergenic	UGT2B15, UGT2B10
4	69610400	rs111653666	T	C	1.0657	-0.045	0.0065	3.807e-12	intergenic	UGT2B15, UGT2B10
4	69610430	rs111801105	G	A	1.0657	-0.045	0.0065	3.807e-12	intergenic	UGT2B15, UGT2B10
4	69610330	rs112767787	G	A	1.0659	-0.045	0.0065	3.839e-12	intergenic	UGT2B15, UGT2B10
4	69610213	rs112236434	C	G	1.0659	-0.045	0.0065	3.846e-12	intergenic	UGT2B15, UGT2B10
4	69610233	rs112500932	T	A	1.0659	-0.045	0.0065	3.846e-12	intergenic	UGT2B15, UGT2B10
4	69610257	rs113768419	C	T	1.0659	-0.045	0.0065	3.846e-12	intergenic	UGT2B15, UGT2B10
4	69610184	rs112243689	G	A	1.0659	-0.045	0.0065	3.853e-12	intergenic	UGT2B15, UGT2B10
4	69610192	rs112779873	A	G	1.0659	-0.045	0.0065	3.853e-12	intergenic	UGT2B15, UGT2B10
4	69610128	rs111709250	G	A	1.066	-0.045	0.0065	3.861e-12	intergenic	UGT2B15, UGT2B10
4	69610004	rs113318925	T	C	1.066	-0.045	0.0065	3.868e-12	intergenic	UGT2B15, UGT2B10
4	69609824	rs112130018	C	T	1.0661	-0.045	0.0065	3.892e-12	intergenic	UGT2B15, UGT2B10
4	69609763	rs114231966	C	T	1.0661	-0.045	0.0065	3.9e-12	intergenic	UGT2B15, UGT2B10
4	69606437	rs116691296	T	C	1.0666	-0.045	0.0064	4.014e-12	intergenic	UGT2B15, UGT2B10
4	69606585	rs116552440	A	T	1.0666	-0.045	0.0064	4.014e-12	intergenic	UGT2B15, UGT2B10
4	69606729	rs114244020	A	C	1.0666	-0.045	0.0064	4.014e-12	intergenic	UGT2B15, UGT2B10
4	69607303	rs116493381	G	T	1.0666	-0.045	0.0064	4.014e-12	intergenic	UGT2B15, UGT2B10
4	69607852	chr4:69607852:I	C	CT	1.0666	-0.045	0.0064	4.014e-12	intergenic	UGT2B15, UGT2B10
4	69607856	chr4:69607856:I	C	CA	1.0666	-0.045	0.0064	4.014e-12	intergenic	UGT2B15, UGT2B10
4	69607874	rs112132722	C	T	1.0666	-0.045	0.0064	4.014e-12	intergenic	UGT2B15, UGT2B10
4	69608007	rs115498491	T	C	1.0666	-0.045	0.0064	4.014e-12	intergenic	UGT2B15, UGT2B10
4	69608033	rs115555315	G	C	1.0666	-0.045	0.0064	4.014e-12	intergenic	UGT2B15, UGT2B10
4	69606943	rs407182	G	A	1.0667	-0.045	0.0064	4.016e-12
4	69608887	rs380168	G	A	1.0667	-0.045	0.0064	4.016e-12
4	69610765	rs116300560	G	T	0.9655	-0.0968	0.0139	4.129e-12	intergenic	UGT2B15, UGT2B10
4	69950346	rs6600871	G	C	0.8788	0.098	0.0141	4.163e-12	intergenic	UGT2A3, UGT2B7
4	69612648	rs115863825	A	G	1.0649	-0.045	0.0065	4.171e-12	intergenic	UGT2B15, UGT2B10
4	69612763	rs114093294	A	G	1.0651	-0.045	0.0065	4.221e-12	intergenic	UGT2B15, UGT2B10
4	69612153	rs113318835	T	C	1.0651	-0.045	0.0065	4.227e-12	intergenic	UGT2B15, UGT2B10
4	69612207	rs112778759	C	T	1.0651	-0.045	0.0065	4.227e-12	intergenic	UGT2B15, UGT2B10
4	69612303	rs111805391	A	G	1.0651	-0.045	0.0065	4.227e-12	intergenic	UGT2B15, UGT2B10
4	69757183	rs114494748	C	T	1.0521	-0.0747	0.0107	4.644e-12	intergenic	UGT2B10, UGT2A3
4	69613687	chr4:69613687:I	A	ACTTT	1.0562	-0.045	0.0065	4.862e-12	intergenic	UGT2B15, UGT2B10
4	69612475	rs145954698	T	C	1.0611	-0.0449	0.0065	4.947e-12	intergenic	UGT2B15, UGT2B10
4	69604936	rs114245252	T	C	1.0666	-0.0448	0.0065	5.102e-12	intergenic	UGT2B15, UGT2B10
4	69624191	rs115486062	T	C	0.9751	-0.0947	0.0137	5.556e-12	intergenic	UGT2B15, UGT2B10
4	69605066	rs116802075	A	G	1.0643	-0.0447	0.0065	5.837e-12	intergenic	UGT2B15, UGT2B10
4	69605412	rs79620874	T	C	1.0637	-0.0447	0.0065	5.863e-12	intergenic	UGT2B15, UGT2B10
4	69614000	rs114365974	G	A	0.9749	-0.0947	0.0137	5.888e-12	intergenic	UGT2B15, UGT2B10
4	69605393	rs76209928	C	A	1.0637	-0.0447	0.0065	5.889e-12	intergenic	UGT2B15, UGT2B10
4	69611639	chr4:69611639:I	G	GT	0.9736	-0.0948	0.0137	6.044e-12	intergenic	UGT2B15, UGT2B10
4	69612123	rs114698644	G	A	0.9736	-0.0948	0.0137	6.044e-12	intergenic	UGT2B15, UGT2B10
4	70093260	rs141620393	T	C	0.6474	-0.13	0.0188	6.112e-12	intergenic	UGT2B11, UGT2B28
4	69609194	chr4:69609194:I	T	TCATA	1.0659	-0.0446	0.0065	6.125e-12	intergenic	UGT2B15, UGT2B10
4	69771377	rs115501639	C	T	0.9945	-0.0812	0.0117	6.413e-12	intergenic	UGT2B10, UGT2A3
4	69771424	rs115762070	T	A	0.9945	-0.0812	0.0117	6.413e-12	intergenic	UGT2B10, UGT2A3
4	69625376	rs2271513	G	A	0.977	-0.0944	0.0137	6.435e-12
4	69771448	rs114727760	C	G	0.9946	-0.0811	0.0117	6.476e-12	intergenic	UGT2B10, UGT2A3
4	69610466	rs112406160	A	G	1.062	-0.0446	0.0065	6.965e-12	intergenic	UGT2B15, UGT2B10
4	69606002	rs146906095	C	T	1.0604	-0.0445	0.0065	7.978e-12	intergenic	UGT2B15, UGT2B10
4	69606191	rs114330086	T	A	1.01	-0.0449	0.0065	8.354e-12	intergenic	UGT2B15, UGT2B10
4	69623072	rs115088032	T	C	1.0594	-0.0447	0.0065	9.241e-12	intergenic	UGT2B15, UGT2B10
4	69605785	rs117723056	T	G	0.968	-0.0938	0.0137	9.529e-12	intergenic	UGT2B15, UGT2B10
4	69609242	rs116402604	G	A	0.969	-0.0937	0.0137	9.669e-12	intergenic	UGT2B15, UGT2B10
4	69607267	rs114473144	T	C	0.9686	-0.0937	0.0137	9.719e-12	intergenic	UGT2B15, UGT2B10
4	69821461	rs115838239	A	G	0.9364	-0.0847	0.0124	9.804e-12	intergenic	UGT2A3, UGT2B7
4	69641171	chr4:69641171:D	GTC	G	0.9685	-0.0857	0.0126	1.231e-11
4	69606254	rs114119885	T	G	0.9682	-0.093	0.0137	1.639e-11	intergenic	UGT2B15, UGT2B10
4	69627831	rs111413070	T	C	1.0472	-0.0412	0.0061	2.265e-11	intergenic	UGT2B15, UGT2B10
4	69605864	chr4:69605864:D	AT	A	1.0158	-0.0443	0.0066	2.433e-11
4	69658159	rs114909970	G	A	1.0466	-0.0411	0.0061	2.545e-11	intergenic	UGT2B15, UGT2B10
4	69640690	rs114520833	G	T	1.0508	-0.041	0.0061	2.76e-11	intergenic	UGT2B15, UGT2B10
4	69628948	rs114190049	C	T	1.0506	-0.0409	0.0061	2.848e-11	intergenic	UGT2B15, UGT2B10
4	69628956	rs114745479	T	C	1.0506	-0.0409	0.0061	2.848e-11	intergenic	UGT2B15, UGT2B10
4	69629290	rs114255902	C	T	1.0506	-0.0409	0.0061	2.848e-11	intergenic	UGT2B15, UGT2B10
4	69629815	rs115748940	A	G	1.0506	-0.0409	0.0061	2.848e-11	intergenic	UGT2B15, UGT2B10
4	69630554	rs1513556	A	G	1.0506	-0.0409	0.0061	2.848e-11
4	69630843	rs7677944	A	C	1.0506	-0.0409	0.0061	2.848e-11
4	69627660	rs113449450	A	T	1.0504	-0.0409	0.0061	2.849e-11	intergenic	UGT2B15, UGT2B10
4	69627845	rs113392814	A	G	1.0504	-0.0409	0.0061	2.849e-11	intergenic	UGT2B15, UGT2B10
4	69628054	rs116819698	C	A	1.0504	-0.0409	0.0061	2.849e-11	intergenic	UGT2B15, UGT2B10
4	69628110	rs114398911	G	A	1.0504	-0.0409	0.0061	2.849e-11	intergenic	UGT2B15, UGT2B10
4	69629211	rs115316647	T	C	1.0496	-0.0409	0.0061	3.071e-11	intergenic	UGT2B15, UGT2B10
4	69612240	rs112415286	C	T	1.0549	-0.0432	0.0065	3.125e-11	intergenic	UGT2B15, UGT2B10
4	69644013	rs114057492	T	C	1.0505	-0.0408	0.0061	3.513e-11	intergenic	UGT2B15, UGT2B10
4	69630029	rs116112729	A	G	1.0505	-0.0407	0.0061	3.602e-11	intergenic	UGT2B15, UGT2B10
4	69638590	rs147799377	A	C	1.0419	-0.0408	0.0061	4.168e-11	intergenic	UGT2B15, UGT2B10
4	69628546	rs114086221	C	T	1.0354	-0.0405	0.0061	5.01e-11	intergenic	UGT2B15, UGT2B10
4	69636845	rs141145136	T	C	1.0518	-0.0401	0.0061	6.095e-11	intergenic	UGT2B15, UGT2B10
4	69641175	chr4:69641175:D	CTG	C	0.9643	-0.0824	0.0126	6.785e-11
4	69670461	rs116777851	A	G	0.9734	-0.0869	0.0133	6.97e-11	intergenic	UGT2B15, UGT2B10
4	69652625	rs116770882	G	C	0.9973	-0.0777	0.0119	7.088e-11	intergenic	UGT2B15, UGT2B10
4	69634496	rs143605227	A	T	1.0296	-0.0404	0.0062	7.165e-11	intergenic	UGT2B15, UGT2B10
4	69648290	chr4:69648290:I	T	TC	0.9269	-0.0818	0.0125	8.711e-11	intergenic	UGT2B15, UGT2B10
4	69674156	rs114745540	G	A	0.9757	-0.0864	0.0133	9.165e-11	intergenic	UGT2B15, UGT2B10
4	69677670	rs115650060	A	C	0.9717	-0.0861	0.0133	1.211e-10	intergenic	UGT2B15, UGT2B10
4	69668714	rs115991625	C	T	0.9687	-0.0839	0.0132	2.292e-10	intergenic	UGT2B15, UGT2B10
4	69640718	rs115087792	C	G	1.051	-0.0388	0.0061	2.496e-10	intergenic	UGT2B15, UGT2B10
4	69632909	rs9993883	A	G	1.0508	-0.0387	0.0061	2.576e-10
4	69686993	rs143733783	A	G	0.841	-0.0718	0.0113	2.85e-10	intronic	UGT2B10
4	69669667	rs114318985	C	T	0.971	-0.0833	0.0132	3.098e-10	intergenic	UGT2B15, UGT2B10
4	69658127	rs115987715	G	C	0.9688	-0.0829	0.0131	3.246e-10	intergenic	UGT2B15, UGT2B10
4	69803723	rs191592946	A	T	0.9437	-0.0814	0.0129	3.337e-10	intronic	UGT2A3
4	69653964	rs114813628	G	A	0.9688	-0.0827	0.0131	3.395e-10	intergenic	UGT2B15, UGT2B10
4	69654415	rs115227509	T	A	0.9689	-0.0827	0.0131	3.423e-10	intergenic	UGT2B15, UGT2B10
4	69609185	rs114619146	A	G	1.091	-0.0386	0.0061	3.474e-10	intergenic	UGT2B15, UGT2B10
4	69607202	rs116711052	G	A	1.0909	-0.0386	0.0061	3.514e-10	intergenic	UGT2B15, UGT2B10
4	69639094	rs117079590	C	T	0.9711	-0.0822	0.0131	4.396e-10	intergenic	UGT2B15, UGT2B10
4	69640025	rs116650164	C	T	1.0474	-0.0382	0.0061	4.409e-10	intergenic	UGT2B15, UGT2B10
4	69602534	rs115119311	T	C	1.0596	-0.04	0.0064	4.764e-10	intergenic	UGT2B15, UGT2B10
4	69639901	rs116777467	A	C	1.0875	-0.0379	0.0061	5.052e-10	intergenic	UGT2B15, UGT2B10
4	69610748	rs115229558	T	C	0.9791	-0.0943	0.0151	5.08e-10	intergenic	UGT2B15, UGT2B10
4	69639244	rs115226152	G	A	1.1003	-0.0381	0.0061	5.193e-10	intergenic	UGT2B15, UGT2B10
4	69720311	rs114529917	A	G	1.0826	0.0425	0.0068	5.204e-10	intergenic	UGT2B10, UGT2A3
4	69629425	rs1513552	G	T	1.1001	-0.0381	0.0061	5.291e-10
4	69624360	rs116222705	C	T	1.0931	-0.0382	0.0061	5.398e-10	intergenic	UGT2B15, UGT2B10
4	69634703	rs182432374	T	C	0.9744	-0.0922	0.0148	5.419e-10	intergenic	UGT2B15, UGT2B10
4	69662363	rs116831524	A	G	1.0963	0.0381	0.0061	5.641e-10	intergenic	UGT2B15, UGT2B10
4	69614445	rs114327546	T	A	0.9875	-0.0918	0.0149	7.714e-10	intergenic	UGT2B15, UGT2B10
4	69835367	rs115789793	T	A	1.0537	-0.0697	0.0113	7.893e-10	intergenic	UGT2A3, UGT2B7
4	69678930	rs114683110	C	G	1.2093	0.0955	0.0155	8.122e-10	intergenic	UGT2B15, UGT2B10
4	69630828	rs1513557	A	G	1.09	-0.0375	0.0061	8.146e-10
4	69635742	rs142720614	A	G	1.0001	-0.0384	0.0062	8.323e-10	intergenic	UGT2B15, UGT2B10
4	69645263	rs139553936	T	C	0.8349	-0.1475	0.0241	1.106e-09	intergenic	UGT2B15, UGT2B10
4	69621321	chr4:69621321:I	A	AAATGT	1.0395	-0.04	0.0066	1.662e-09	intergenic	UGT2B15, UGT2B10
4	69684574	rs145194440	C	T	1.0864	0.0373	0.0062	1.727e-09	intronic	UGT2B10
4	69687676	chr4:69687676:D	AG	A	1.0293	0.0381	0.0063	1.861e-09
4	69640823	chr4:69640823:I	G	GAAAT	0.9942	-0.0672	0.0112	1.939e-09	intergenic	UGT2B15, UGT2B10
4	69675764	rs114055332	A	C	1.0794	0.0365	0.0061	2.948e-09	intergenic	UGT2B15, UGT2B10
4	69832066	rs115362306	G	A	1.064	-0.0658	0.0111	3.431e-09	intergenic	UGT2A3, UGT2B7
4	69832734	rs116565506	C	T	1.064	-0.0658	0.0111	3.431e-09	intergenic	UGT2A3, UGT2B7
4	69834939	rs115177560	G	A	1.064	-0.0658	0.0111	3.431e-09	intergenic	UGT2A3, UGT2B7
4	69836622	rs116201744	C	T	1.0636	-0.0657	0.0111	3.514e-09	intergenic	UGT2A3, UGT2B7
4	69684548	rs114004636	C	G	1.224	0.093	0.0158	4.174e-09	intronic	UGT2B10
4	69682471	rs294777	A	G	1.2244	0.0929	0.0158	4.259e-09
4	69619429	rs113865757	C	T	1.2408	-0.0901	0.0153	4.314e-09	intergenic	UGT2B15, UGT2B10
4	69827491	rs115081823	A	C	1.0701	-0.0652	0.0111	4.418e-09	intergenic	UGT2A3, UGT2B7
4	69840290	rs115974458	T	C	1.0537	-0.0651	0.0111	5.731e-09	intergenic	UGT2A3, UGT2B7
4	69823747	rs116503688	A	C	1.0699	-0.0646	0.0111	6.077e-09	intergenic	UGT2A3, UGT2B7
4	69821583	rs114147553	T	C	1.0679	-0.0644	0.0111	6.715e-09	intergenic	UGT2A3, UGT2B7
4	69673875	chr4:69673875:I	G	GC	1.1797	0.0921	0.0159	7.858e-09	intergenic	UGT2B15, UGT2B10
4	69672645	rs116684908	A	G	1.2425	0.0888	0.0154	8.292e-09	intergenic	UGT2B15, UGT2B10
4	69673877	chr4:69673877:I	C	CT	1.1847	0.0934	0.0161	8.348e-09	intergenic	UGT2B15, UGT2B10
4	69771935	rs12651295	A	C	1.0364	-0.0456	0.008	1.37e-08
4	70138176	rs11725085	C	T	0.4403	-0.2405	0.0423	1.453e-08	intergenic	UGT2B11, UGT2B28
4	69689001	rs149606678	A	G	1.1795	0.0914	0.0161	1.455e-08	intronic	UGT2B10
4	69689633	rs114850007	A	T	1.2008	0.0903	0.0161	2.186e-08	intronic	UGT2B10
4	69772690	rs115389770	A	G	0.9865	-0.0461	0.0082	2.207e-08	intergenic	UGT2B10, UGT2A3
4	69657695	rs116715804	T	C	1.1995	-0.0891	0.0159	2.372e-08	intergenic	UGT2B15, UGT2B10
4	69695007	rs116471971	A	C	0.9395	-0.0789	0.0141	2.405e-08	intronic	UGT2B10
4	69652787	rs116531272	G	A	1.2009	-0.0889	0.0159	2.525e-08	intergenic	UGT2B15, UGT2B10
4	69835462	rs115538326	G	A	1.0078	-0.0793	0.0142	2.543e-08	intergenic	UGT2A3, UGT2B7
4	69665571	rs115859082	A	C	1.1959	0.0891	0.016	2.606e-08	intergenic	UGT2B15, UGT2B10
7	96134981	rs4132568	A	C	1.0853	-0.0343	0.0061	2.687e-08	intronic	SHFM1
7	96130638	rs10953178	C	T	1.0865	-0.0342	0.0061	2.799e-08	intronic	SHFM1
4	69706195	rs150984550	G	A	0.8018	-0.1584	0.0285	3.162e-08	intergenic	UGT2B10, UGT2A3
4	69762953	rs7678798	T	C	1.0437	-0.0443	0.008	3.239e-08
4	69729001	chr4:69729001:D	AATTAAC	A	1.0081	-0.0492	0.0089	3.486e-08
4	70063352	rs149175636	C	G	0.4788	-0.2289	0.0415	3.748e-08	intergenic	UGT2B7, UGT2B11
4	70063390	rs143287671	A	T	0.4788	-0.2289	0.0415	3.748e-08	intergenic	UGT2B7, UGT2B11
4	69592725	rs142751613	G	T	1.0024	-0.1033	0.0188	4.178e-08	intergenic	UGT2B15, UGT2B10
4	69627962	rs148029840	T	C	0.8855	-0.0897	0.0163	4.478e-08	intergenic	UGT2B15, UGT2B10
4	69720832	rs116184259	C	A	0.955	-0.0748	0.0136	4.54e-08	intergenic	UGT2B10, UGT2A3
4	69627961	rs144563014	T	A	0.892	-0.0893	0.0163	4.541e-08	intergenic	UGT2B15, UGT2B10
4	69728408	chr4:69728408:D	GA	G	1.0055	-0.0488	0.0089	4.842e-08
4	69722960	rs116498746	C	T	1.0056	-0.0488	0.0089	4.888e-08	intergenic	UGT2B10, UGT2A3
4	69723767	rs114866244	T	C	1.0056	-0.0488	0.0089	4.888e-08	intergenic	UGT2B10, UGT2A3
4	69725006	rs115264860	C	T	1.0056	-0.0488	0.0089	4.888e-08	intergenic	UGT2B10, UGT2A3
4	69727220	rs114711302	C	T	1.0056	-0.0488	0.0089	4.888e-08	intergenic	UGT2B10, UGT2A3
4	69727258	rs114858759	G	C	1.0056	-0.0488	0.0089	4.888e-08	intergenic	UGT2B10, UGT2A3
4	69727682	rs7674919	G	A	1.0056	-0.0488	0.0089	4.888e-08
