# Supplementary material for: The Contribution of Common Genetic Variation to Nicotine and Cotinine Glucuronidation in Multiple Ethnic/Racial Populations
Source: Oxford University Press journal article supplement (doi:10.1158/1055-9965.epi-14-0815), 2014-10-08
Supplement: 10559965epi140815-sup-134771_1_supp_2653864_nbp70z.xls [file 10559965epi140815-sup-134771_1_supp_2653864_nbp70z.xls]

## Sheet: Supplemental_TableS5_082014
Supplemental Table S5: List of 412 globally significant associations (p < 5x10-8) for cotinine glucuronidation among Japanese Americans
CHR	BP	SNP	A1	A2	INFO	BETA	SE	P
4	69687987	rs116294140	C	A	0.9468	0.1699	0.0143	9.567e-30
4	69669270	rs114710085	C	T	0.9593	-0.1665	0.0141	2.068e-29
4	69682555	rs115443755	G	A	0.9593	0.1665	0.0141	2.068e-29
4	69673553	rs115765562	C	A	0.9593	0.1665	0.0141	2.068e-29
4	69685772	rs116224959	G	A	0.9593	0.1665	0.0141	2.068e-29
4	69675177	rs116367243	T	A	0.9593	0.1665	0.0141	2.068e-29
4	69669216	rs141360540	G	A	0.9593	-0.1665	0.0141	2.068e-29
4	69669183	rs146596079	T	C	0.9593	-0.1665	0.0141	2.068e-29
4	69686221	rs835317	G	T	0.9593	0.1665	0.0141	2.068e-29
4	69680933	rs114247160	C	T	0.9577	0.1663	0.0141	2.593e-29
4	69605785	rs117723056	T	G	0.9625	-0.1686	0.0143	2.682e-29
4	69648290	chr4:69648290:I	T	TC	0.9627	-0.1684	0.0143	2.728e-29
4	69606254	rs114119885	T	G	0.9627	-0.1685	0.0143	2.732e-29
4	69607267	rs114473144	T	C	0.9629	-0.1685	0.0143	2.736e-29
4	69618019	rs116458816	A	T	0.9637	-0.1684	0.0143	2.75e-29
4	69621267	rs116218628	G	A	0.9542	-0.1701	0.0144	2.752e-29
4	69611639	chr4:69611639:I	G	GT	0.9633	-0.1685	0.0143	2.777e-29
4	69614000	rs114365974	G	A	0.9633	-0.1685	0.0143	2.777e-29
4	69612123	rs114698644	G	A	0.9633	-0.1685	0.0143	2.777e-29
4	69614031	rs116051501	A	C	0.9633	-0.1685	0.0143	2.777e-29
4	69612344	rs137960876	C	T	0.9633	-0.1685	0.0143	2.777e-29
4	69614445	rs114327546	T	A	0.9635	-0.1684	0.0143	2.783e-29
4	69609242	rs116402604	G	A	0.9631	-0.1685	0.0143	2.791e-29
4	69619748	rs115684409	A	G	0.9641	-0.1683	0.0143	2.794e-29
4	69641171	chr4:69641171:D	GTC	G	0.9643	-0.1683	0.0143	2.802e-29
4	69641175	chr4:69641175:D	CTG	C	0.9643	-0.1683	0.0143	2.802e-29
4	69651787	chr4:69651787:D	GA	G	0.9643	-0.1683	0.0143	2.802e-29
4	69652757	chr4:69652757:D	GT	G	0.9643	-0.1683	0.0143	2.802e-29
4	69680826	chr4:69680826:D	AAATG	A	0.9643	0.1683	0.0143	2.802e-29
4	69645069	rs113999949	G	A	0.9643	-0.1683	0.0143	2.802e-29
4	69673123	rs114061210	A	G	0.9643	0.1683	0.0143	2.802e-29
4	69660303	rs114136864	C	T	0.9643	-0.1683	0.0143	2.802e-29
4	69685482	rs114178203	A	G	0.9643	0.1683	0.0143	2.802e-29
4	69669667	rs114318985	C	T	0.9643	-0.1683	0.0143	2.802e-29
4	69678450	rs114477351	T	C	0.9643	0.1683	0.0143	2.802e-29
4	69642142	rs114576382	C	T	0.9643	-0.1683	0.0143	2.802e-29
4	69653514	rs114615110	G	A	0.9643	-0.1683	0.0143	2.802e-29
4	69674156	rs114745540	G	A	0.9643	-0.1683	0.0143	2.802e-29
4	69653964	rs114813628	G	A	0.9643	-0.1683	0.0143	2.802e-29
4	69679220	rs114818997	T	A	0.9643	0.1683	0.0143	2.802e-29
4	69683953	rs114828297	G	C	0.9643	0.1683	0.0143	2.802e-29
4	69652573	rs114874870	G	A	0.9643	-0.1683	0.0143	2.802e-29
4	69667714	rs114972368	C	G	0.9643	-0.1683	0.0143	2.802e-29
4	69654415	rs115227509	T	A	0.9643	-0.1683	0.0143	2.802e-29
4	69655714	rs115235503	C	T	0.9643	-0.1683	0.0143	2.802e-29
4	69657899	rs115377518	C	T	0.9643	-0.1683	0.0143	2.802e-29
4	69624191	rs115486062	T	C	0.9643	-0.1683	0.0143	2.802e-29
4	69677670	rs115650060	A	C	0.9643	-0.1683	0.0143	2.802e-29
4	69671064	rs115745146	T	C	0.9643	0.1683	0.0143	2.802e-29
4	69660834	rs115801223	G	C	0.9643	-0.1683	0.0143	2.802e-29
4	69686282	rs115814261	G	A	0.9643	0.1683	0.0143	2.802e-29
4	69650293	rs115858476	T	C	0.9643	-0.1683	0.0143	2.802e-29
4	69644798	rs115860183	G	A	0.9643	-0.1683	0.0143	2.802e-29
4	69658127	rs115987715	G	C	0.9643	-0.1683	0.0143	2.802e-29
4	69668714	rs115991625	C	T	0.9643	-0.1683	0.0143	2.802e-29
4	69654408	rs116149014	A	G	0.9643	-0.1683	0.0143	2.802e-29
4	69645553	rs116248512	G	A	0.9643	-0.1683	0.0143	2.802e-29
4	69663547	rs116317320	C	T	0.9643	-0.1683	0.0143	2.802e-29
4	69671235	rs116467558	G	C	0.9643	0.1683	0.0143	2.802e-29
4	69632988	rs116559190	C	T	0.9643	-0.1683	0.0143	2.802e-29
4	69668510	rs116612687	T	C	0.9643	-0.1683	0.0143	2.802e-29
4	69685048	rs116691621	T	A	0.9643	0.1683	0.0143	2.802e-29
4	69652625	rs116770882	G	C	0.9643	-0.1683	0.0143	2.802e-29
4	69670461	rs116777851	A	G	0.9643	-0.1683	0.0143	2.802e-29
4	69639094	rs117079590	C	T	0.9643	-0.1683	0.0143	2.802e-29
4	69630961	rs117386657	A	G	0.9643	-0.1683	0.0143	2.802e-29
4	69664536	rs142124595	G	T	0.9643	-0.1683	0.0143	2.802e-29
4	69637006	rs143713409	C	A	0.9643	-0.1683	0.0143	2.802e-29
4	69636752	rs146423074	C	T	0.9643	-0.1683	0.0143	2.802e-29
4	69634703	rs182432374	T	C	0.9643	-0.1683	0.0143	2.802e-29
4	69652756	rs186116289	T	C	0.9643	-0.1683	0.0143	2.802e-29
4	69625376	rs2271513	G	A	0.9643	-0.1683	0.0143	2.802e-29
4	69673775	rs294768	A	C	0.9643	0.1683	0.0143	2.802e-29
4	69686425	rs835319	G	A	0.9643	0.1683	0.0143	2.802e-29
4	69677744	chr4:69677744:I	C	CTT	0.9641	0.1683	0.0143	2.862e-29
4	69611272	rs116053942	G	A	0.9595	-0.1682	0.0143	3.525e-29
4	69631870	rs115225050	C	T	0.9599	-0.1678	0.0143	3.54e-29
4	69682855	rs116010004	T	G	0.9561	0.1648	0.014	4.885e-29
4	69651890	rs114317895	A	G	0.9185	-0.1668	0.0143	8.591e-29
4	69673113	rs114863460	C	T	0.9582	0.1649	0.0142	2.082e-28
4	69610748	rs115229558	T	C	0.9584	-0.1676	0.0146	6.016e-28
4	69610765	rs116300560	G	T	0.9584	-0.1676	0.0146	6.016e-28
4	69684338	chr4:69684338:D	GA	G	0.9059	0.1623	0.0142	1.238e-27
4	69641777	rs115804752	A	G	0.9704	-0.1664	0.0146	1.857e-27
4	69641776	rs115120773	C	T	0.9708	-0.1663	0.0146	1.871e-27
4	69593281	rs117751083	T	G	0.8357	-0.1708	0.0172	1.078e-21
4	69590120	rs139138450	T	C	0.831	-0.1708	0.0173	1.416e-21
4	69627962	rs148029840	T	C	0.9331	-0.1677	0.0176	3.369e-20
4	69627961	rs144563014	T	A	0.9287	-0.1682	0.0177	3.704e-20
4	69627977	rs140026617	G	A	0.9031	-0.1727	0.0182	4.984e-20
4	69627971	rs142868845	G	A	0.9031	-0.1727	0.0182	4.984e-20
4	69627976	rs146083413	T	C	0.9031	-0.1727	0.0182	4.984e-20
4	69561735	rs144592739	G	A	0.7746	-0.1711	0.0181	5.395e-20
4	69567218	rs150059016	T	C	0.7755	-0.1723	0.0183	6.397e-20
4	69544455	rs140948610	C	T	0.7486	-0.1681	0.0185	1.153e-18
4	69668393	rs139365833	A	T	0.8272	-0.1937	0.0213	1.272e-18
4	69668395	rs145589934	T	C	0.8272	-0.1937	0.0213	1.272e-18
4	69668396	rs147713091	A	C	0.8272	-0.1937	0.0213	1.272e-18
4	69668391	rs150896747	G	C	0.8272	-0.1937	0.0213	1.272e-18
4	69646725	chr4:69646725:I	G	GT	0.8325	-0.15	0.0166	1.559e-18
4	69670507	rs114710642	A	G	0.9819	0.1099	0.0123	3.379e-18
4	69627634	rs111326963	C	A	0.9829	-0.1081	0.0123	1.043e-17
4	69627697	rs113284913	C	A	0.9829	-0.1081	0.0123	1.043e-17
4	69638282	rs114911966	G	A	0.9829	-0.1081	0.0123	1.043e-17
4	69635056	rs139408548	T	A	0.9829	-0.1081	0.0123	1.043e-17
4	69636366	rs140048689	C	A	0.9829	-0.1081	0.0123	1.043e-17
4	69639151	rs141084263	G	A	0.9829	-0.1081	0.0123	1.043e-17
4	69636291	rs183152907	T	C	0.9829	-0.1081	0.0123	1.043e-17
4	69533131	rs148994655	C	A	0.7228	-0.1642	0.0189	3.329e-17
4	69671710	rs117776223	A	G	0.9029	-0.1778	0.0205	3.388e-17
4	69631265	chr4:69631265:I	G	GA	0.9657	-0.106	0.0122	3.504e-17
4	69695007	rs116471971	A	C	0.9228	-0.1459	0.0172	1.451e-16
4	69619887	rs115232263	C	A	0.9274	-0.1033	0.0122	2.067e-16
4	69644900	chr4:69644900:D	GGGGTGT	G	0.7898	-0.1991	0.0238	3.098e-16
4	69708443	rs9996074	G	T	0.9394	-0.1416	0.017	4.921e-16
4	69681675	rs146998169	A	T	0.7217	0.1039	0.0125	5.164e-16
4	69720832	rs116184259	C	A	0.9339	-0.1413	0.0171	9.427e-16
4	69735308	rs116535483	A	C	0.9296	-0.1416	0.0172	9.64e-16
4	69723719	rs114006663	A	G	0.9334	-0.141	0.0172	1.16e-15
4	69724708	rs114184467	T	G	0.9334	-0.141	0.0172	1.16e-15
4	69644905	chr4:69644905:D	GT	G	0.8212	-0.1823	0.0222	1.265e-15
4	69993047	rs180709530	T	C	0.7432	-0.1617	0.02	2.801e-15
4	69716139	rs115997581	C	T	0.9313	-0.1367	0.017	3.401e-15
4	69798562	chr4:69798562:D	CTT	C	0.9399	-0.1369	0.0173	9.75e-15
4	69806836	rs114266982	C	G	0.9399	-0.1369	0.0173	9.75e-15
4	69800741	rs114277047	A	T	0.9399	-0.1369	0.0173	9.75e-15
4	69797093	rs115340877	G	A	0.9399	-0.1369	0.0173	9.75e-15
4	69796530	rs115840819	C	A	0.9399	-0.1369	0.0173	9.75e-15
4	69801609	rs141726048	A	G	0.9399	-0.1369	0.0173	9.75e-15
4	69804357	rs144607806	G	A	0.9399	-0.1369	0.0173	9.75e-15
4	69804305	rs146879893	G	A	0.9399	-0.1369	0.0173	9.75e-15
4	69787328	rs114952287	A	C	0.9405	-0.1369	0.0173	1.009e-14
4	69787064	rs115092003	G	T	0.9405	-0.1369	0.0173	1.009e-14
4	69787468	rs115381641	T	C	0.9405	-0.1369	0.0173	1.009e-14
4	69783601	rs115437059	G	T	0.9405	-0.1369	0.0173	1.009e-14
4	69788168	rs116502613	T	A	0.9405	-0.1369	0.0173	1.009e-14
4	69610456	rs115819204	A	G	0.9414	-0.0834	0.0105	1.033e-14
4	69812414	rs116451666	G	T	0.9189	-0.1351	0.0177	8.795e-14
4	69626729	rs114484008	G	A	0.9848	-0.0761	0.01	1.211e-13
4	69604233	rs115193261	A	G	0.984	-0.0761	0.01	1.227e-13
4	69603951	rs116777753	A	G	0.984	-0.0761	0.01	1.227e-13
4	69618241	rs114746963	A	T	0.9722	-0.0767	0.0102	1.497e-13
4	69624646	rs114889311	A	G	0.9722	-0.0767	0.0102	1.497e-13
4	69611266	rs113493235	C	G	0.972	-0.0767	0.0102	1.523e-13
4	69607189	rs115229263	G	A	0.972	-0.0767	0.0102	1.523e-13
4	69609640	rs115288377	T	C	0.972	-0.0767	0.0102	1.523e-13
4	69603722	chr4:69603722:D	AT	A	0.9711	-0.0767	0.0102	1.552e-13
4	69603599	rs116712630	G	A	0.9711	-0.0767	0.0102	1.552e-13
4	69603141	rs115232281	C	T	0.9711	-0.0767	0.0102	1.568e-13
4	69808256	rs189154587	T	C	0.7447	-0.1321	0.0178	3.146e-13
4	69642265	rs115485831	A	T	1.025	-0.0608	0.0083	7.405e-13
4	69647536	rs114970731	A	G	1.0251	-0.0607	0.0083	7.565e-13
4	69656777	rs115553258	G	A	1.0254	-0.0605	0.0083	8.973e-13
4	69658879	rs116001863	T	C	1.0256	-0.0605	0.0083	9.41e-13
4	69659738	rs115097835	C	T	1.0256	-0.0604	0.0083	9.622e-13
4	69661615	rs113444800	A	G	1.0258	-0.0604	0.0083	1.006e-12
4	69663476	rs114057562	G	A	1.0259	-0.0603	0.0083	1.052e-12
4	69663632	rs115651349	G	A	1.026	-0.0603	0.0083	1.076e-12
4	69664301	rs140205714	T	G	1.026	-0.0603	0.0083	1.076e-12
4	69687610	chr4:69687610:I	G	GA	0.8461	0.0811	0.0112	1.441e-12
4	69659833	rs113999752	C	A	1.0148	-0.0601	0.0083	1.453e-12
4	69768551	rs115072211	C	T	0.9381	-0.1328	0.0185	2.006e-12
4	69762272	rs116121886	G	A	0.9413	-0.1325	0.0185	2.175e-12
4	69758701	rs115596782	C	T	0.942	-0.1324	0.0185	2.218e-12
4	69750318	rs143347282	A	T	0.9439	-0.1322	0.0185	2.318e-12
4	69746719	rs114691164	C	A	0.9447	-0.1321	0.0185	2.372e-12
4	69739572	rs752209	A	G	0.9485	-0.1316	0.0185	2.633e-12
4	69669388	rs115219551	A	G	0.9837	-0.0596	0.0084	3.834e-12
4	69605178	chr4:69605178:I	G	GT	0.9727	-0.0654	0.0096	2.391e-11
4	69604490	rs115472926	T	C	0.9784	-0.0657	0.0097	2.426e-11
4	69610450	rs113645682	G	A	0.9801	-0.0655	0.0096	2.51e-11
4	69606191	rs114330086	T	A	0.952	-0.0649	0.0096	3.568e-11
4	69655555	rs114664732	A	G	1.019	-0.0547	0.0081	3.571e-11
4	69662451	rs114898162	C	T	1.019	0.0547	0.0081	3.571e-11
4	69649428	rs115761002	T	A	1.019	-0.0547	0.0081	3.571e-11
4	69662832	rs116143572	G	C	1.019	0.0547	0.0081	3.571e-11
4	69642621	rs116557783	T	C	1.019	-0.0547	0.0081	3.571e-11
4	69646608	rs115456036	C	T	1.0189	-0.0547	0.0081	3.591e-11
4	69666382	rs116305335	C	T	1.0187	0.0547	0.0081	3.678e-11
4	69666984	rs114204995	T	A	1.0183	0.0547	0.0081	3.846e-11
4	69602534	rs115119311	T	C	0.9959	-0.0618	0.0093	6.285e-11
4	69612257	chr4:69612257:D	AC	A	0.9892	-0.0625	0.0095	8.783e-11
4	69605393	rs76209928	C	A	0.9974	-0.0617	0.0094	1.047e-10
4	69605412	rs79620874	T	C	0.9974	-0.0617	0.0094	1.047e-10
4	69609194	chr4:69609194:I	T	TCATA	1.0037	-0.0615	0.0094	1.126e-10
4	69605182	chr4:69605182:I	T	TC	1.0038	-0.0613	0.0094	1.239e-10
4	69614282	rs116155553	G	A	1.0009	-0.0617	0.0094	1.246e-10
4	69612240	rs112415286	C	T	1.005	-0.0613	0.0094	1.248e-10
4	69624846	rs115100680	C	T	1	-0.0613	0.0094	1.249e-10
4	69614042	rs111448156	C	T	1.0009	-0.0617	0.0094	1.253e-10
4	69612648	rs115863825	A	G	1.0051	-0.0613	0.0094	1.256e-10
4	69612303	rs111805391	A	G	1.0052	-0.0613	0.0094	1.259e-10
4	69612207	rs112778759	C	T	1.0052	-0.0613	0.0094	1.259e-10
4	69612153	rs113318835	T	C	1.0052	-0.0613	0.0094	1.259e-10
4	69612763	rs114093294	A	G	1.0052	-0.0613	0.0094	1.259e-10
4	69612475	rs145954698	T	C	1.0052	-0.0613	0.0094	1.259e-10
4	69623496	rs116710191	A	G	1.0021	-0.0613	0.0094	1.262e-10
4	69614059	rs113351212	T	A	1.0051	-0.0613	0.0094	1.264e-10
4	69619275	rs114676038	C	G	1.0039	-0.0613	0.0094	1.265e-10
4	69619078	rs115414681	C	G	1.0039	-0.0613	0.0094	1.265e-10
4	69618644	rs149773789	G	A	1.0042	-0.0613	0.0094	1.265e-10
4	69619813	rs111254231	G	A	1.0037	-0.0613	0.0094	1.266e-10
4	69619688	rs111774338	A	C	1.0037	-0.0613	0.0094	1.266e-10
4	69618237	rs115009294	G	A	1.0044	-0.0613	0.0094	1.266e-10
4	69618420	rs115317383	A	C	1.0043	-0.0613	0.0094	1.266e-10
4	69619339	rs115738802	G	A	1.0038	-0.0613	0.0094	1.266e-10
4	69619315	rs116549414	T	C	1.0038	-0.0613	0.0094	1.266e-10
4	69619917	rs115108742	C	T	1.0036	-0.0613	0.0094	1.267e-10
4	69621938	rs114999894	G	C	1.0029	-0.0613	0.0094	1.268e-10
4	69620401	rs115229303	A	G	1.0035	-0.0613	0.0094	1.268e-10
4	69620606	rs114373343	A	T	1.0034	-0.0613	0.0094	1.269e-10
4	69613687	chr4:69613687:I	A	ACTTT	1.0052	-0.0613	0.0094	1.27e-10
4	69606002	rs146906095	C	T	1.0052	-0.0613	0.0094	1.27e-10
4	69607852	chr4:69607852:I	C	CT	1.0053	-0.0613	0.0094	1.272e-10
4	69607856	chr4:69607856:I	C	CA	1.0053	-0.0613	0.0094	1.272e-10
4	69610128	rs111709250	G	A	1.0053	-0.0613	0.0094	1.272e-10
4	69609824	rs112130018	C	T	1.0053	-0.0613	0.0094	1.272e-10
4	69607874	rs112132722	C	T	1.0053	-0.0613	0.0094	1.272e-10
4	69613972	rs112153034	T	A	1.0053	-0.0613	0.0094	1.272e-10
4	69610213	rs112236434	C	G	1.0053	-0.0613	0.0094	1.272e-10
4	69609924	rs112239062	T	A	1.0053	-0.0613	0.0094	1.272e-10
4	69610184	rs112243689	G	A	1.0053	-0.0613	0.0094	1.272e-10
4	69610233	rs112500932	T	A	1.0053	-0.0613	0.0094	1.272e-10
4	69613882	rs112599474	C	T	1.0053	-0.0613	0.0094	1.272e-10
4	69610330	rs112767787	G	A	1.0053	-0.0613	0.0094	1.272e-10
4	69610192	rs112779873	A	G	1.0053	-0.0613	0.0094	1.272e-10
4	69611223	rs112784694	A	G	1.0053	-0.0613	0.0094	1.272e-10
4	69610004	rs113318925	T	C	1.0053	-0.0613	0.0094	1.272e-10
4	69610257	rs113768419	C	T	1.0053	-0.0613	0.0094	1.272e-10
4	69615138	rs114048682	G	A	1.0053	-0.0613	0.0094	1.272e-10
4	69609763	rs114231966	C	T	1.0053	-0.0613	0.0094	1.272e-10
4	69606729	rs114244020	A	C	1.0053	-0.0613	0.0094	1.272e-10
4	69615849	rs114383883	C	T	1.0053	-0.0613	0.0094	1.272e-10
4	69614973	rs115133351	T	G	1.0053	-0.0613	0.0094	1.272e-10
4	69615314	rs115155294	C	T	1.0053	-0.0613	0.0094	1.272e-10
4	69609576	rs115197162	A	T	1.0053	-0.0613	0.0094	1.272e-10
4	69615767	rs115419613	C	A	1.0053	-0.0613	0.0094	1.272e-10
4	69608007	rs115498491	T	C	1.0053	-0.0613	0.0094	1.272e-10
4	69615741	rs115548723	T	C	1.0053	-0.0613	0.0094	1.272e-10
4	69608033	rs115555315	G	C	1.0053	-0.0613	0.0094	1.272e-10
4	69615068	rs115851158	A	G	1.0053	-0.0613	0.0094	1.272e-10
4	69615660	rs115868753	T	C	1.0053	-0.0613	0.0094	1.272e-10
4	69616437	rs116363094	T	C	1.0053	-0.0613	0.0094	1.272e-10
4	69611769	rs116390686	G	A	1.0053	-0.0613	0.0094	1.272e-10
4	69607303	rs116493381	G	T	1.0053	-0.0613	0.0094	1.272e-10
4	69616336	rs116525660	G	A	1.0053	-0.0613	0.0094	1.272e-10
4	69606585	rs116552440	A	T	1.0053	-0.0613	0.0094	1.272e-10
4	69616140	rs116558634	G	A	1.0053	-0.0613	0.0094	1.272e-10
4	69614431	rs116649821	C	T	1.0053	-0.0613	0.0094	1.272e-10
4	69606437	rs116691296	T	C	1.0053	-0.0613	0.0094	1.272e-10
4	69614542	rs148060416	C	T	1.0053	-0.0613	0.0094	1.272e-10
4	69611220	rs76203808	C	T	1.0053	-0.0613	0.0094	1.272e-10
4	69608887	rs380168	G	A	1.0053	-0.0613	0.0094	1.272e-10
4	69616575	rs389715	G	A	1.0053	-0.0613	0.0094	1.272e-10
4	69611505	rs397678	C	T	1.0053	-0.0613	0.0094	1.272e-10
4	69613030	rs403552	T	C	1.0053	-0.0613	0.0094	1.272e-10
4	69606943	rs407182	G	A	1.0053	-0.0613	0.0094	1.272e-10
4	69621227	rs115859359	T	A	1.0033	-0.0613	0.0094	1.273e-10
4	69621445	rs114383090	A	G	1.0032	-0.0613	0.0094	1.274e-10
4	69621380	rs116051919	T	G	1.0032	-0.0613	0.0094	1.274e-10
4	69621981	rs116003235	A	T	1.0031	-0.0613	0.0094	1.278e-10
4	69621964	rs116620928	C	G	1.0031	-0.0613	0.0094	1.278e-10
4	69614025	rs113041224	A	G	1.0052	-0.0612	0.0094	1.28e-10
4	69622218	rs116313770	G	C	1.0031	-0.0613	0.0094	1.28e-10
4	69604936	rs114245252	T	C	1.0045	-0.0613	0.0094	1.283e-10
4	69622658	rs114168134	T	C	1.0031	-0.0612	0.0094	1.284e-10
4	69622531	rs115172690	T	G	1.0031	-0.0612	0.0094	1.284e-10
4	69610400	rs111653666	T	C	1.0052	-0.0612	0.0094	1.287e-10
4	69610430	rs111801105	G	A	1.0052	-0.0612	0.0094	1.287e-10
4	69610704	rs114612059	G	A	1.0052	-0.0612	0.0094	1.287e-10
4	69623072	rs115088032	T	C	1.003	-0.0612	0.0094	1.294e-10
4	69623976	rs114121284	G	C	1.0031	-0.0612	0.0094	1.301e-10
4	69624312	rs115822916	A	G	1.0031	-0.0612	0.0094	1.304e-10
4	69605066	rs116802075	A	G	1.0029	-0.0613	0.0094	1.306e-10
4	69611166	chr4:69611166:D	GT	G	1.005	-0.0612	0.0094	1.31e-10
4	69624755	rs111689490	T	C	1.0031	-0.0612	0.0094	1.31e-10
4	69624757	rs112374626	G	A	1.0031	-0.0612	0.0094	1.31e-10
4	69624820	rs113247582	A	G	1.0031	-0.0612	0.0094	1.31e-10
4	69624642	rs115020720	A	G	1.0031	-0.0612	0.0094	1.31e-10
4	69610466	rs112406160	A	G	1.0049	-0.0612	0.0094	1.317e-10
4	69609990	rs111572083	T	A	1.0035	-0.0615	0.0094	1.32e-10
4	69625730	rs115130067	G	A	1.0032	-0.0612	0.0094	1.324e-10
4	69625505	rs116206615	G	C	1.0032	-0.0612	0.0094	1.326e-10
4	69626037	rs116353550	A	G	1.0033	-0.0612	0.0094	1.327e-10
4	69625622	rs142945327	T	C	1.0031	-0.0612	0.0094	1.333e-10
4	69625628	rs151089786	C	G	1.0031	-0.0612	0.0094	1.333e-10
4	69627436	rs113364384	A	G	1.0034	-0.0611	0.0094	1.335e-10
4	69627254	rs114475271	T	A	1.0034	-0.0611	0.0094	1.335e-10
4	69626319	rs115176266	A	G	1.0034	-0.0611	0.0094	1.335e-10
4	69612531	rs138596472	C	T	1.0045	-0.0612	0.0094	1.335e-10
4	69627258	rs79310544	T	C	1.0034	-0.0611	0.0094	1.335e-10
4	69626404	rs1828705	C	A	1.0034	-0.0611	0.0094	1.335e-10
4	69621321	chr4:69621321:I	A	AAATGT	0.9897	-0.062	0.0095	1.362e-10
4	69635742	rs142720614	A	G	1.0229	-0.0507	0.0078	1.576e-10
4	69613721	rs114564871	T	C	0.9956	-0.0614	0.0095	1.727e-10
4	69613378	rs114938014	T	A	0.9955	-0.0614	0.0095	1.746e-10
4	69628582	chr4:69628582:I	T	TAGGG	1.0231	-0.0501	0.0078	2.254e-10
4	69627831	rs111413070	T	C	1.0358	-0.0493	0.0077	3.241e-10
4	69607202	rs116711052	G	A	1.0322	-0.0494	0.0077	3.245e-10
4	69609185	rs114619146	A	G	1.0324	-0.0494	0.0077	3.261e-10
4	69605624	rs192801605	G	A	0.8603	-0.0934	0.0146	3.312e-10
4	69624360	rs116222705	C	T	1.0355	-0.0491	0.0077	3.987e-10
4	69658159	rs114909970	G	A	1.0422	-0.0488	0.0077	4.173e-10
4	69636845	rs141145136	T	C	1.0432	-0.0488	0.0077	4.188e-10
4	69644013	rs114057492	T	C	1.043	-0.0488	0.0077	4.232e-10
4	69627845	rs113392814	A	G	1.0433	-0.0488	0.0077	4.303e-10
4	69627660	rs113449450	A	T	1.0433	-0.0488	0.0077	4.303e-10
4	69628110	rs114398911	G	A	1.0433	-0.0488	0.0077	4.303e-10
4	69628054	rs116819698	C	A	1.0433	-0.0488	0.0077	4.303e-10
4	69640690	rs114520833	G	T	1.0434	-0.0488	0.0077	4.32e-10
4	69640718	rs115087792	C	G	1.0434	-0.0488	0.0077	4.32e-10
4	69640025	rs116650164	C	T	1.0434	-0.0488	0.0077	4.32e-10
4	69628948	rs114190049	C	T	1.0434	-0.0488	0.0077	4.33e-10
4	69629290	rs114255902	C	T	1.0434	-0.0488	0.0077	4.33e-10
4	69628956	rs114745479	T	C	1.0434	-0.0488	0.0077	4.33e-10
4	69629211	rs115316647	T	C	1.0434	-0.0488	0.0077	4.33e-10
4	69629815	rs115748940	A	G	1.0434	-0.0488	0.0077	4.33e-10
4	69630029	rs116112729	A	G	1.0434	-0.0488	0.0077	4.33e-10
4	69630554	rs1513556	A	G	1.0434	-0.0488	0.0077	4.33e-10
4	69630843	rs7677944	A	C	1.0434	-0.0488	0.0077	4.33e-10
4	69632909	rs9993883	A	G	1.0434	-0.0488	0.0077	4.33e-10
4	69638590	rs147799377	A	C	1.0362	-0.0489	0.0077	4.62e-10
4	69662363	rs116831524	A	G	1.0425	0.0486	0.0077	5.115e-10
4	69634496	rs143605227	A	T	1.0363	-0.0487	0.0077	5.268e-10
4	69639244	rs115226152	G	A	1.044	-0.0485	0.0077	5.454e-10
4	69639901	rs116777467	A	C	1.044	-0.0485	0.0077	5.454e-10
4	69763314	rs114997133	T	C	0.9559	-0.0662	0.0105	5.463e-10
4	69629425	rs1513552	G	T	1.044	-0.0485	0.0077	5.466e-10
4	69630828	rs1513557	A	G	1.0494	-0.0483	0.0077	5.754e-10
4	69628546	rs114086221	C	T	1.0317	-0.0485	0.0077	6.437e-10
4	69605864	chr4:69605864:D	AT	A	0.9796	-0.0589	0.0095	1.203e-09
4	69772694	rs6847539	C	A	0.9937	-0.0587	0.0097	2.218e-09
4	69678079	chr4:69678079:I	C	CT	0.9763	0.0507	0.0084	3.046e-09
4	69678161	rs115183376	G	T	0.9854	0.0506	0.0084	3.069e-09
4	69678373	rs115880803	C	G	0.9854	0.0506	0.0084	3.069e-09
4	69685853	rs835316	G	A	0.9854	0.0506	0.0084	3.069e-09
4	69687964	rs861340	G	A	0.9854	0.0506	0.0084	3.069e-09
4	69910965	rs190326433	C	T	0.7805	-0.2015	0.0338	4.209e-09
4	69937504	rs191723982	A	G	0.7877	-0.2005	0.0337	4.448e-09
4	69948496	rs141939610	T	C	0.774	-0.1995	0.0337	5.206e-09
4	69731281	chr4:69731281:I	T	TA	0.7934	-0.0812	0.0138	5.835e-09
4	69682629	rs114617157	A	G	0.9806	0.0498	0.0085	6.228e-09
4	69684121	rs844342	G	T	0.9808	0.0498	0.0085	6.23e-09
4	69878330	chr4:69878330:D	CCT	C	0.563	-0.1813	0.0309	6.969e-09
4	69811453	chr4:69811453:D	AGAAG	A	1.005	0.0483	0.0083	7.675e-09
4	69640823	chr4:69640823:I	G	GAAAT	0.9253	-0.0832	0.0143	9.372e-09
4	70219302	rs7664174	C	G	0.9003	-0.168	0.0289	9.832e-09
4	69802856	rs114534663	T	C	1.0104	0.0473	0.0083	1.665e-08
4	69813268	rs115297394	G	C	1.0104	0.0473	0.0083	1.665e-08
4	69807028	rs116405561	G	A	1.0104	0.0473	0.0083	1.665e-08
4	69803733	rs116592447	A	G	1.0104	0.0473	0.0083	1.665e-08
4	69813786	rs116675998	A	G	1.0104	0.0473	0.0083	1.665e-08
4	69803384	rs116798430	G	A	1.0104	0.0473	0.0083	1.665e-08
4	69805972	rs143532207	T	G	1.0104	0.0473	0.0083	1.665e-08
4	69802377	rs144729290	A	G	1.0104	0.0473	0.0083	1.665e-08
4	69810824	rs10010699	C	A	1.0104	0.0473	0.0083	1.665e-08
4	69803179	rs2331562	A	G	1.0104	0.0473	0.0083	1.665e-08
4	69812522	rs9329037	C	T	1.0104	0.0473	0.0083	1.665e-08
4	69814327	rs114516103	A	G	1.0103	0.0472	0.0083	1.685e-08
4	69814541	rs116035772	C	T	1.0103	0.0472	0.0083	1.685e-08
4	69816064	rs116765729	A	G	1.0101	0.0472	0.0083	1.696e-08
4	69816278	rs114134084	C	T	1.0101	0.0472	0.0083	1.701e-08
4	69816469	rs115063592	A	C	1.0101	0.0472	0.0083	1.705e-08
4	69815333	rs116371363	C	T	1.008	0.0473	0.0083	1.706e-08
4	69808095	rs115685293	T	C	1.0074	0.0472	0.0083	1.79e-08
4	69799332	rs114993924	A	G	1.0174	0.0468	0.0082	1.805e-08
4	69795397	rs114105233	G	A	1.0175	0.0468	0.0082	1.819e-08
4	69798670	rs114502942	T	C	1.0175	0.0468	0.0082	1.819e-08
4	69796548	rs114644208	G	A	1.0175	0.0468	0.0082	1.819e-08
4	69798112	rs115044436	G	A	1.0175	0.0468	0.0082	1.819e-08
4	69795871	rs115205753	G	C	1.0175	0.0468	0.0082	1.819e-08
4	69795626	rs139709914	C	T	1.0175	0.0468	0.0082	1.819e-08
4	69808408	rs114719002	C	T	1.0075	0.0472	0.0083	1.835e-08
4	69810300	rs115571507	G	C	1.0075	0.0472	0.0083	1.835e-08
4	69808895	rs116030924	A	T	1.0075	0.0472	0.0083	1.835e-08
4	69794338	rs114069793	G	A	1.0178	0.0468	0.0082	1.848e-08
4	69785825	rs140758423	A	G	1.0185	0.0467	0.0082	1.885e-08
4	69789111	rs114092212	T	A	1.0183	0.0467	0.0082	1.892e-08
4	69789855	rs114324646	C	T	1.0183	0.0467	0.0082	1.892e-08
4	69791526	rs114338906	C	G	1.0183	0.0467	0.0082	1.892e-08
4	69792932	rs114541203	A	G	1.0183	0.0467	0.0082	1.892e-08
4	69787613	rs114913916	T	C	1.0183	0.0467	0.0082	1.892e-08
4	69787683	rs114918479	T	C	1.0183	0.0467	0.0082	1.892e-08
4	69789539	rs115036062	A	G	1.0183	0.0467	0.0082	1.892e-08
4	69787177	rs115454861	C	T	1.0183	0.0467	0.0082	1.892e-08
4	69793225	rs115494248	T	C	1.0183	0.0467	0.0082	1.892e-08
4	69787803	rs115532502	A	G	1.0183	0.0467	0.0082	1.892e-08
4	69791726	rs115575471	G	A	1.0183	0.0467	0.0082	1.892e-08
4	69787871	rs115977204	A	G	1.0183	0.0467	0.0082	1.892e-08
4	69787382	rs116065952	C	T	1.0183	0.0467	0.0082	1.892e-08
4	69793765	rs116651952	A	G	1.0183	0.0467	0.0082	1.892e-08
4	69786431	rs10019843	T	C	1.0183	0.0467	0.0082	1.892e-08
4	69790366	rs115826492	T	C	1.0182	0.0467	0.0082	1.911e-08
4	69785130	rs114539166	T	C	1.0181	0.0467	0.0082	1.915e-08
4	69784576	rs115177890	T	C	1.0181	0.0467	0.0082	1.915e-08
4	69782895	rs114054976	C	T	1.0129	0.0468	0.0082	1.925e-08
4	69783367	rs114622556	G	C	1.0179	0.0467	0.0082	1.938e-08
4	69783421	rs116045705	G	A	1.0179	0.0467	0.0082	1.938e-08
4	69783798	rs116718456	G	C	1.0179	0.0467	0.0082	1.938e-08
4	69784260	rs116168205	C	T	1.0172	0.0467	0.0082	1.941e-08
4	69782467	rs114480863	C	A	1.0174	0.0467	0.0082	2.033e-08
4	69783851	rs151272568	C	T	0.9941	0.0469	0.0083	2.148e-08
4	69672097	rs116089398	G	T	0.8049	0.0507	0.009	2.399e-08
4	69806439	rs115179908	G	A	0.9511	0.0476	0.0084	2.63e-08
4	69673556	rs114730236	G	A	0.9129	0.0483	0.0086	3.019e-08
4	69673557	rs116586853	A	T	0.9129	0.0483	0.0086	3.019e-08
4	69818082	rs1458246	C	A	1.0062	0.0465	0.0083	3.07e-08
4	69791084	rs150716438	A	G	0.8549	-0.0658	0.0118	3.305e-08
4	69684574	rs145194440	C	T	1.0119	0.0441	0.0079	3.594e-08
4	69675764	rs114055332	A	C	1.0122	0.0441	0.0079	3.601e-08
4	69835462	rs115538326	G	A	0.9537	-0.1154	0.0207	3.724e-08
4	69801014	rs192114913	A	G	0.6431	-0.0771	0.0139	4.527e-08
