# Supplementary material for: The Contribution of Common Genetic Variation to Nicotine and Cotinine Glucuronidation in Multiple Ethnic/Racial Populations
Source: Oxford University Press journal article supplement (doi:10.1158/1055-9965.epi-14-0815), 2014-10-08
Supplement: 10559965epi140815-sup-134771_1_supp_2653866_nbpc0z.xls [file 10559965epi140815-sup-134771_1_supp_2653866_nbpc0z.xls]

## Sheet: Supplemental_TableS7_082014
Supplemental Table S7: List of 497 globally significant associations (p < 5x10-8) for cotinine glucuronidation among Latino Americans
CHR	BP	SNP	A1	A2	INFO	BETA	SE	P
4	69673553	rs115765562	C	A	0.991	0.1715	0.0131	2.433e-33
4	69675177	rs116367243	T	A	0.9867	0.1712	0.0131	3.306e-33
4	69680933	rs114247160	C	T	0.9856	0.1697	0.0131	1.018e-32
4	69682555	rs115443755	G	A	0.9901	0.1684	0.013	1.66e-32
4	69682855	rs116010004	T	G	0.9901	0.1683	0.013	1.731e-32
4	69686221	rs835317	G	T	0.9909	0.1682	0.013	1.755e-32
4	69685772	rs116224959	G	A	0.9907	0.1682	0.013	1.822e-32
4	69678079	chr4:69678079:I	C	CT	0.9365	0.1545	0.0125	3.327e-30
4	69678161	rs115183376	G	T	0.9567	0.1542	0.0127	2.399e-29
4	69678373	rs115880803	C	G	0.9567	0.1542	0.0127	2.419e-29
4	69682629	rs114617157	A	G	0.9578	0.1535	0.0127	3.075e-29
4	69685853	rs835316	G	A	0.9596	0.1534	0.0127	3.3e-29
4	69684121	rs844342	G	T	0.9596	0.1534	0.0127	3.3e-29
4	69687964	rs861340	G	A	0.9596	0.1534	0.0127	3.3e-29
4	69662832	rs116143572	G	C	0.9493	0.1544	0.0129	1.313e-28
4	69662451	rs114898162	C	T	0.9505	0.1538	0.0129	1.798e-28
4	69681675	rs146998169	A	T	0.8296	0.1507	0.0127	1.933e-28
4	69666984	rs114204995	T	A	0.9547	0.1536	0.0129	1.959e-28
4	69666382	rs116305335	C	T	0.9543	0.1536	0.0129	2.116e-28
4	69655555	rs114664732	A	G	0.9497	-0.1528	0.0129	3.632e-28
4	69649428	rs115761002	T	A	0.9497	-0.1523	0.0129	5.552e-28
4	69646608	rs115456036	C	T	0.949	-0.152	0.0129	7.521e-28
4	69619887	rs115232263	C	A	0.9626	-0.158	0.0135	1.149e-27
4	69642621	rs116557783	T	C	0.9493	-0.1515	0.013	1.187e-27
4	69673556	rs114730236	G	A	0.8416	0.1433	0.0128	6.787e-26
4	69673557	rs116586853	A	T	0.8416	0.1433	0.0128	6.787e-26
4	69669216	rs141360540	G	A	0.9404	-0.16	0.0156	3.09e-22
4	69673555	chr4:69673555:I	A	AAT	0.7333	0.13	0.0129	1.286e-21
4	69669270	rs114710085	C	T	0.9264	-0.1592	0.0161	7.323e-21
4	69669183	rs146596079	T	C	0.9267	-0.1525	0.0155	8.344e-21
4	69664301	rs140205714	T	G	0.9151	-0.1479	0.0151	1.404e-20
4	69663476	rs114057562	G	A	0.915	-0.1478	0.0151	1.438e-20
4	69663632	rs115651349	G	A	0.915	-0.1478	0.0151	1.438e-20
4	69661615	rs113444800	A	G	0.9155	-0.1477	0.0151	1.528e-20
4	69659738	rs115097835	C	T	0.9155	-0.1475	0.0151	1.644e-20
4	69658879	rs116001863	T	C	0.9155	-0.1474	0.0151	1.735e-20
4	69656777	rs115553258	G	A	0.9155	-0.1473	0.0151	1.843e-20
4	69659833	rs113999752	C	A	0.9081	-0.1468	0.0151	1.996e-20
4	69647536	rs114970731	A	G	0.9174	-0.1464	0.0151	2.788e-20
4	69642265	rs115485831	A	T	0.9209	-0.1453	0.0151	5.106e-20
4	69677744	chr4:69677744:I	C	CTT	1.1066	0.1743	0.0192	3.206e-18
4	69671064	rs115745146	T	C	1.1278	0.1744	0.0194	6.926e-18
4	69673775	rs294768	A	C	1.1431	0.1733	0.0193	7.298e-18
4	69673123	rs114061210	A	G	1.1357	0.1739	0.0194	8.291e-18
4	69671235	rs116467558	G	C	1.1106	0.1687	0.0189	1.236e-17
4	69678450	rs114477351	T	C	1.1292	0.1718	0.0193	1.402e-17
4	69689122	rs138132853	C	G	1.0375	0.133	0.015	1.927e-17
4	69679220	rs114818997	T	A	1.1351	0.1719	0.0194	2.029e-17
4	69680826	chr4:69680826:D	AAATG	A	1.1368	0.1714	0.0194	2.457e-17
4	69685482	rs114178203	A	G	1.1402	0.1703	0.0194	3.412e-17
4	69685048	rs116691621	T	A	1.1402	0.1703	0.0194	3.412e-17
4	69686282	rs115814261	G	A	1.1323	0.1701	0.0194	3.805e-17
4	69673113	rs114863460	C	T	1.0749	0.167	0.019	3.916e-17
4	69686425	rs835319	G	A	1.1431	0.1698	0.0194	4.237e-17
4	69687987	rs116294140	C	A	1.135	0.1698	0.0194	4.58e-17
4	69720311	rs114529917	A	G	1.0164	0.1252	0.0143	4.684e-17
4	69683953	rs114828297	G	C	1.1218	0.1647	0.0189	5.948e-17
4	69670073	rs138998181	C	T	1.0067	0.1295	0.015	9.687e-17
4	69669388	rs115219551	A	G	0.698	-0.1296	0.0151	1.624e-16
4	69684338	chr4:69684338:D	GA	G	1.0569	0.1627	0.0194	7.106e-16
4	69670179	rs115442155	A	G	0.9163	0.1257	0.0151	1.094e-15
4	69636291	rs183152907	T	C	1.0709	-0.149	0.018	1.581e-15
4	69639151	rs141084263	G	A	1.0722	-0.1489	0.018	1.61e-15
4	69638282	rs114911966	G	A	1.0724	-0.1488	0.018	1.613e-15
4	69636366	rs140048689	C	A	1.0722	-0.1488	0.018	1.623e-15
4	69635056	rs139408548	T	A	1.0724	-0.1487	0.018	1.628e-15
4	69627634	rs111326963	C	A	1.0711	-0.1465	0.0179	2.947e-15
4	69627697	rs113284913	C	A	1.0711	-0.1465	0.0179	2.947e-15
4	69611058	rs115214611	C	T	0.9853	-0.1335	0.0165	5.387e-15
4	69670507	rs114710642	A	G	1.1142	0.1459	0.0183	1.259e-14
4	69672097	rs116089398	G	T	0.657	0.1046	0.0132	1.835e-14
4	69631265	chr4:69631265:I	G	GA	1.0721	-0.1399	0.0182	1.122e-13
4	69835462	rs115538326	G	A	1.0755	-0.1796	0.0247	1.73e-12
4	69822449	rs115568112	A	G	1.0513	0.11	0.0152	2.162e-12
4	69827340	rs12513263	A	C	1.0912	0.1114	0.0155	2.624e-12
4	69822928	rs1824264	T	C	1.0912	0.1114	0.0155	2.624e-12
4	69835367	rs115789793	T	A	1.0605	-0.1382	0.0193	3.125e-12
4	69823253	rs115444048	C	A	1.0449	-0.1688	0.0235	3.236e-12
4	69772690	rs115389770	A	G	0.9073	-0.1198	0.0168	3.77e-12
4	69771935	rs12651295	A	C	0.9596	-0.1186	0.0167	4.89e-12
4	69739730	rs116605561	A	C	0.9657	-0.1211	0.0171	6.09e-12
4	69827491	rs115081823	A	C	1.0959	-0.1297	0.0184	7.13e-12
4	69823747	rs116503688	A	C	1.0959	-0.1297	0.0184	7.13e-12
4	69840290	rs115974458	T	C	1.0925	-0.13	0.0184	7.184e-12
4	69741799	rs116052796	G	T	0.9667	-0.1207	0.0171	7.233e-12
4	69834939	rs115177560	G	A	1.0954	-0.1297	0.0184	7.328e-12
4	69832066	rs115362306	G	A	1.0954	-0.1297	0.0184	7.328e-12
4	69836622	rs116201744	C	T	1.0954	-0.1297	0.0184	7.328e-12
4	69832734	rs116565506	C	T	1.0954	-0.1297	0.0184	7.328e-12
4	69821583	rs114147553	T	C	1.0946	-0.1296	0.0184	7.479e-12
4	69743225	rs149163214	A	C	0.967	-0.1207	0.0171	7.484e-12
4	69755998	rs115069780	G	A	0.9675	-0.1204	0.0171	8.329e-12
4	69771836	rs116603350	A	G	0.9525	-0.1166	0.0166	8.772e-12
4	69601886	chr4:69601886:D	TC	T	0.9686	-0.1239	0.0177	8.947e-12
4	69766443	rs114742135	A	T	0.9669	-0.1202	0.0172	9.414e-12
4	69766364	rs115835349	C	T	0.9671	-0.1202	0.0172	9.56e-12
4	69687610	chr4:69687610:I	G	GA	0.9171	0.1236	0.0177	9.943e-12
4	69761311	rs114795848	A	G	0.9705	-0.1199	0.0171	1.002e-11
4	69761239	rs115527001	A	G	0.9705	-0.1199	0.0171	1.002e-11
4	69759022	rs115824708	C	A	0.9705	-0.1199	0.0171	1.002e-11
4	69763910	rs114986615	C	T	0.9699	-0.1199	0.0171	1.003e-11
4	69763587	rs115202858	G	A	0.9702	-0.1199	0.0171	1.02e-11
4	69688430	rs114253128	G	A	0.9601	-0.1321	0.0189	1.132e-11
4	69766119	rs114826126	A	T	0.9657	-0.1199	0.0172	1.148e-11
4	69771114	rs7681837	C	T	0.9701	-0.1189	0.0171	1.282e-11
4	69757183	rs114494748	C	T	0.9663	-0.1177	0.017	1.525e-11
4	69843772	rs116084646	T	A	1.1006	0.1078	0.0156	1.533e-11
4	69825760	rs117607700	G	A	1.0242	0.1084	0.0157	1.63e-11
4	69835174	rs115259848	G	A	1.0977	0.1079	0.0156	1.64e-11
4	69830359	rs114206878	G	T	1.0979	0.1079	0.0156	1.691e-11
4	69835126	rs114592226	T	C	1.0979	0.1079	0.0156	1.691e-11
4	69833651	rs115204162	G	T	1.0979	0.1079	0.0156	1.691e-11
4	69830871	rs115312808	T	C	1.0979	0.1079	0.0156	1.691e-11
4	69835860	rs115797269	G	T	1.0979	0.1079	0.0156	1.691e-11
4	69835294	rs116421739	T	G	1.0979	0.1079	0.0156	1.691e-11
4	69835837	rs116483335	G	A	1.0979	0.1079	0.0156	1.691e-11
4	69841774	rs114890801	T	C	1.096	0.108	0.0156	1.71e-11
4	69843154	rs114319402	C	T	1.0956	0.108	0.0156	1.724e-11
4	69842205	rs115044584	T	C	1.0956	0.108	0.0156	1.724e-11
4	69841930	rs115049841	C	G	1.0956	0.108	0.0156	1.724e-11
4	69762953	rs7678798	T	C	0.9616	-0.1156	0.0168	1.907e-11
4	69687689	rs115094696	G	T	0.9667	-0.1285	0.0187	2.137e-11
4	69672126	rs144102461	T	A	0.9375	-0.1412	0.0206	2.254e-11
4	69669603	rs114754935	C	A	0.9812	-0.1328	0.0194	2.367e-11
4	69672068	rs115480801	G	A	0.944	-0.1399	0.0204	2.403e-11
4	69826561	rs115505351	G	C	1.0265	0.1072	0.0156	2.448e-11
4	69685965	rs114587479	T	C	0.9722	-0.1275	0.0187	2.842e-11
4	69619529	chr4:69619529:D	AC	A	0.928	-0.1395	0.0205	3.128e-11
4	69650840	chr4:69650840:D	ATAAT	A	0.9465	-0.1438	0.0211	3.142e-11
4	69737036	rs11726946	A	G	0.9534	-0.112	0.0166	4.635e-11
4	69670995	chr4:69670995:I	T	TGCTCCCA	0.9549	-0.1362	0.0202	4.898e-11
4	69736764	rs115411305	C	G	0.9528	-0.1117	0.0166	5.286e-11
4	69547700	rs149901371	A	T	0.9413	0.2099	0.0313	6.419e-11
4	69672745	rs116339858	C	T	0.9476	-0.1341	0.0201	7.344e-11
4	69681244	rs115619871	C	T	0.9364	-0.1257	0.0188	7.353e-11
4	69672251	rs114730872	A	G	0.9514	-0.1339	0.0201	7.535e-11
4	69670886	rs114639233	T	C	0.9594	-0.1337	0.02	7.826e-11
4	69671302	rs11737672	T	C	0.9594	-0.1337	0.02	7.826e-11
4	69680943	rs114097237	A	T	0.9379	-0.1335	0.0201	8.939e-11
4	69650838	chr4:69650838:D	CAAT	C	0.9575	-0.1384	0.0208	9.015e-11
4	69680942	rs116625312	A	T	0.939	-0.1334	0.0201	9.151e-11
4	69730377	rs116691259	G	A	0.9511	-0.1107	0.0167	9.207e-11
4	69770779	rs114237743	G	T	0.943	-0.1171	0.0176	9.21e-11
4	69675084	rs115038978	G	C	0.9434	-0.1327	0.02	9.301e-11
4	69675510	rs115163082	C	G	0.943	-0.1327	0.02	9.309e-11
4	69675326	rs114521961	C	G	0.9434	-0.1326	0.02	9.568e-11
4	69771354	rs114546260	T	C	0.9444	-0.116	0.0175	9.683e-11
4	69771283	rs115600564	C	G	0.9444	-0.116	0.0175	9.683e-11
4	69771309	rs116515246	A	C	0.9444	-0.116	0.0175	9.683e-11
4	69724084	chr4:69724084:I	A	AT	0.9508	-0.1104	0.0167	1.023e-10
4	69722947	rs115646318	C	T	0.9508	-0.1104	0.0167	1.023e-10
4	69676956	rs116585506	T	C	0.9367	-0.129	0.0195	1.032e-10
4	69733034	rs114182442	G	A	0.9594	-0.1119	0.0169	1.055e-10
4	69677759	rs115232947	G	A	0.9431	-0.1321	0.02	1.055e-10
4	69678128	rs115796823	C	G	0.9433	-0.1319	0.0199	1.09e-10
4	69678943	rs116511001	G	T	0.9432	-0.1319	0.0199	1.097e-10
4	69730266	rs115831974	A	G	0.9578	-0.1118	0.0169	1.122e-10
4	69668520	rs115968327	G	A	0.9658	-0.1364	0.0206	1.124e-10
4	69669990	rs116164018	C	G	0.9658	-0.1364	0.0206	1.124e-10
4	69669268	rs151231285	C	T	0.9654	-0.1363	0.0206	1.141e-10
4	69654056	rs115920747	C	A	0.9662	-0.1362	0.0206	1.168e-10
4	69659773	rs116135845	A	G	0.9662	-0.1362	0.0206	1.168e-10
4	69831267	rs116042318	C	A	1.1013	0.1032	0.0156	1.191e-10
4	69623839	chr4:69623839:D	TC	T	0.9666	-0.1361	0.0206	1.215e-10
4	69619452	rs112010479	G	A	0.9666	-0.1361	0.0206	1.215e-10
4	69629705	rs114369716	T	A	0.9666	-0.1361	0.0206	1.215e-10
4	69643921	rs114636474	G	A	0.9666	-0.1361	0.0206	1.215e-10
4	69652560	rs115250354	G	T	0.9666	-0.1361	0.0206	1.215e-10
4	69639160	rs115292483	C	T	0.9666	-0.1361	0.0206	1.215e-10
4	69642982	rs115363606	C	T	0.9666	-0.1361	0.0206	1.215e-10
4	69631428	rs115703809	G	A	0.9666	-0.1361	0.0206	1.215e-10
4	69622812	rs115749265	C	A	0.9666	-0.1361	0.0206	1.215e-10
4	69621010	rs116134160	C	T	0.9666	-0.1361	0.0206	1.215e-10
4	69649509	rs116134381	C	A	0.9666	-0.1361	0.0206	1.215e-10
4	69632394	rs116592574	C	T	0.9666	-0.1361	0.0206	1.215e-10
4	69625413	rs116829614	G	C	0.9666	-0.1361	0.0206	1.215e-10
4	69637632	rs143331934	T	C	0.9666	-0.1361	0.0206	1.215e-10
4	69634240	rs145469425	C	T	0.9666	-0.1361	0.0206	1.215e-10
4	69625414	rs11731269	G	A	0.9666	-0.1361	0.0206	1.215e-10
4	69688125	rs146889061	G	T	0.9482	-0.131	0.0199	1.216e-10
4	69619618	rs113923277	G	A	0.9614	-0.1362	0.0206	1.225e-10
4	69625607	rs112493252	C	T	0.9235	-0.1425	0.0216	1.228e-10
4	69614157	rs112831907	G	A	0.9663	-0.136	0.0206	1.273e-10
4	69610144	rs113042441	T	C	0.9663	-0.136	0.0206	1.273e-10
4	69612332	rs113821880	C	T	0.9663	-0.136	0.0206	1.273e-10
4	69613181	rs116108091	T	G	0.9663	-0.136	0.0206	1.273e-10
4	69612801	rs116764105	G	A	0.9663	-0.136	0.0206	1.273e-10
4	69721246	rs115524872	G	A	0.9502	-0.11	0.0167	1.277e-10
4	69613227	rs114108676	T	A	0.9658	-0.136	0.0206	1.296e-10
4	69614293	rs114413515	C	T	0.9658	-0.136	0.0206	1.296e-10
4	69616791	rs115568501	G	A	0.9658	-0.136	0.0206	1.296e-10
4	69617561	rs116181568	T	A	0.9658	-0.136	0.0206	1.296e-10
4	69612658	rs114722783	G	A	0.9654	-0.1359	0.0206	1.32e-10
4	69612963	rs116429127	T	A	0.9654	-0.1359	0.0206	1.32e-10
4	69612556	rs139454689	T	C	0.9654	-0.1359	0.0206	1.32e-10
4	69609345	rs114526018	G	T	0.9659	-0.1359	0.0207	1.333e-10
4	69607124	rs115116836	G	A	0.9659	-0.1359	0.0207	1.333e-10
4	69687619	rs144238031	C	T	0.949	-0.1303	0.0198	1.381e-10
4	69606897	rs114276393	G	T	0.9651	-0.1358	0.0207	1.383e-10
4	69607021	rs115577600	A	G	0.9651	-0.1358	0.0207	1.383e-10
4	69607610	rs115620203	A	T	0.9651	-0.1358	0.0207	1.383e-10
4	69687214	rs116007193	T	C	0.9467	-0.1304	0.0198	1.411e-10
4	69678764	rs114375522	T	A	0.9463	-0.1303	0.0199	1.523e-10
4	69679748	rs141926198	G	A	0.9463	-0.1303	0.0199	1.523e-10
4	69681619	rs140431502	C	T	0.94	-0.13	0.0198	1.574e-10
4	69686975	rs114714824	T	C	0.9504	-0.1294	0.0198	1.603e-10
4	69729044	chr4:69729044:I	C	CTTAT	0.9541	-0.1115	0.017	1.62e-10
4	69686676	rs115759958	A	G	0.9512	-0.1291	0.0197	1.693e-10
4	69731281	chr4:69731281:I	T	TA	0.7095	-0.1435	0.0219	1.708e-10
4	69682509	rs114874096	A	G	0.9515	-0.129	0.0197	1.714e-10
4	69683636	rs114993422	G	A	0.9515	-0.129	0.0197	1.714e-10
4	69685752	rs115258821	A	C	0.9515	-0.129	0.0197	1.714e-10
4	69686381	rs116031106	G	A	0.9515	-0.129	0.0197	1.714e-10
4	69682795	rs116533103	G	A	0.9515	-0.129	0.0197	1.714e-10
4	69681848	rs138956169	T	C	0.9515	-0.129	0.0197	1.714e-10
4	69684923	rs140646937	T	C	0.9515	-0.129	0.0197	1.714e-10
4	69681936	rs144647471	G	T	0.9515	-0.129	0.0197	1.714e-10
4	69682690	rs150713743	A	G	0.9515	-0.129	0.0197	1.714e-10
4	69746647	rs114612145	A	G	0.9519	-0.1297	0.0199	1.869e-10
4	69729815	rs116445309	T	A	0.9594	-0.1329	0.0204	1.882e-10
4	69746875	rs116692755	C	G	0.9522	-0.1297	0.0199	1.905e-10
4	69771448	rs114727760	C	G	0.9274	-0.1171	0.018	2.132e-10
4	69771377	rs115501639	C	T	0.9274	-0.1171	0.018	2.132e-10
4	69771424	rs115762070	T	A	0.9274	-0.1171	0.018	2.132e-10
4	69729558	rs115756472	A	G	0.9491	-0.1081	0.0166	2.146e-10
4	69603602	rs115474343	A	G	0.9624	-0.1346	0.0207	2.282e-10
4	69753685	rs115815311	G	A	0.9584	-0.133	0.0205	2.479e-10
4	69755206	rs116379644	A	C	0.9584	-0.133	0.0205	2.479e-10
4	69759101	rs116380956	A	G	0.9584	-0.133	0.0205	2.479e-10
4	69760471	rs114014249	A	G	0.9584	-0.133	0.0205	2.499e-10
4	69754283	rs115166258	G	A	0.9584	-0.133	0.0205	2.499e-10
4	69718019	rs115479464	T	G	0.9398	-0.1086	0.0168	2.565e-10
4	69853538	rs116675861	T	A	1.1559	0.103	0.016	3.172e-10
4	69657899	rs115377518	C	T	0.9958	-0.1583	0.0246	3.331e-10
4	69660303	rs114136864	C	T	0.9957	-0.1583	0.0246	3.332e-10
4	69660834	rs115801223	G	C	0.9957	-0.1583	0.0246	3.332e-10
4	69651787	chr4:69651787:D	GA	G	0.9969	-0.1581	0.0246	3.354e-10
4	69652757	chr4:69652757:D	GT	G	0.9969	-0.1581	0.0246	3.354e-10
4	69653514	rs114615110	G	A	0.9969	-0.1581	0.0246	3.354e-10
4	69652573	rs114874870	G	A	0.9969	-0.1581	0.0246	3.354e-10
4	69652756	rs186116289	T	C	0.9969	-0.1581	0.0246	3.354e-10
4	69650293	rs115858476	T	C	0.9971	-0.158	0.0246	3.358e-10
4	69645069	rs113999949	G	A	0.9973	-0.1579	0.0246	3.364e-10
4	69645553	rs116248512	G	A	0.9973	-0.1579	0.0246	3.364e-10
4	69651890	rs114317895	A	G	0.9963	-0.158	0.0246	3.379e-10
4	69667714	rs114972368	C	G	0.9935	-0.1585	0.0247	3.386e-10
4	69668510	rs116612687	T	C	0.9935	-0.1585	0.0247	3.386e-10
4	69663547	rs116317320	C	T	0.9943	-0.1583	0.0246	3.392e-10
4	69664536	rs142124595	G	T	0.9943	-0.1583	0.0246	3.392e-10
4	69655714	rs115235503	C	T	0.9962	-0.1581	0.0246	3.417e-10
4	69654408	rs116149014	A	G	0.9964	-0.1581	0.0246	3.42e-10
4	69735968	rs143375194	A	G	0.925	-0.1045	0.0163	4.179e-10
4	69644798	rs115860183	G	A	0.9994	-0.1571	0.0246	4.295e-10
4	69673877	chr4:69673877:I	C	CT	1.2568	0.2014	0.0316	4.471e-10
4	69719134	rs116262380	C	T	0.948	-0.1065	0.0167	4.608e-10
4	69611272	rs116053942	G	A	0.9948	-0.1566	0.0246	5.18e-10
4	69614031	rs116051501	A	C	0.9989	-0.1564	0.0246	5.373e-10
4	69618019	rs116458816	A	T	0.9989	-0.1564	0.0246	5.373e-10
4	69621267	rs116218628	G	A	0.9976	-0.1566	0.0247	5.415e-10
4	69607530	chr4:69607530:D	AC	A	0.9147	-0.1285	0.0202	5.435e-10
4	69641175	chr4:69641175:D	CTG	C	0.9951	-0.156	0.0246	5.45e-10
4	69619748	rs115684409	A	G	0.9995	-0.1563	0.0246	5.469e-10
4	69641171	chr4:69641171:D	GTC	G	1.0027	-0.1564	0.0247	5.532e-10
4	69631870	rs115225050	C	T	1.0034	-0.1559	0.0246	5.599e-10
4	69642142	rs114576382	C	T	1.004	-0.1559	0.0246	5.604e-10
4	69632988	rs116559190	C	T	1.004	-0.1559	0.0246	5.604e-10
4	69637006	rs143713409	C	A	1.004	-0.1559	0.0246	5.604e-10
4	69636752	rs146423074	C	T	1.004	-0.1559	0.0246	5.604e-10
4	69861962	rs114301709	A	G	1.1476	0.1013	0.016	5.843e-10
4	69863100	rs115182303	A	C	1.1519	0.1012	0.016	6.153e-10
4	69863571	rs115880148	A	T	1.1519	0.1012	0.016	6.153e-10
4	69863439	rs116600933	G	A	1.1519	0.1012	0.016	6.153e-10
4	69862424	rs116044142	A	G	1.1507	0.1011	0.016	6.162e-10
4	69862344	rs116037342	G	A	1.1504	0.1011	0.016	6.181e-10
4	69863734	rs116702628	T	G	1.1502	0.1011	0.016	6.346e-10
4	69863941	rs114973334	A	G	1.15	0.1011	0.016	6.35e-10
4	69864055	rs114201465	G	A	1.1498	0.1011	0.016	6.407e-10
4	69864482	rs116786219	G	A	1.1498	0.1011	0.016	6.407e-10
4	69652625	rs116770882	G	C	0.9898	-0.1505	0.0238	6.613e-10
4	69724935	rs114373813	A	G	0.918	-0.1356	0.0215	6.685e-10
4	69717968	rs188560849	C	A	0.918	-0.1356	0.0215	6.685e-10
4	69717969	rs192169379	A	T	0.918	-0.1356	0.0215	6.685e-10
4	69735957	rs150405933	C	T	0.9234	-0.1318	0.0209	6.932e-10
4	69855515	rs114486736	T	G	1.1466	0.1005	0.016	7.34e-10
4	69863494	chr4:69863494:I	T	TGGATGATTC	1.1328	0.1003	0.0159	7.426e-10
4	69749552	rs139784893	G	A	0.895	-0.141	0.0224	7.519e-10
4	69688962	rs141925749	G	A	0.9402	-0.1273	0.0202	7.621e-10
4	69739411	rs114473265	T	C	0.9168	-0.1337	0.0213	8.04e-10
4	69673415	rs115985945	G	A	0.9591	-0.1448	0.023	8.081e-10
4	69648290	chr4:69648290:I	T	TC	0.9195	-0.1589	0.0253	8.153e-10
4	69848967	rs114246578	A	G	1.1481	0.0999	0.0159	8.496e-10
4	69851501	rs115880908	G	C	1.1481	0.0999	0.0159	8.496e-10
4	69849405	rs116798228	G	A	1.1481	0.0999	0.0159	8.496e-10
4	69850452	rs6818594	T	C	1.1481	0.0999	0.0159	8.496e-10
4	69740155	rs116018225	C	T	0.9167	-0.1336	0.0213	8.503e-10
4	69852289	rs116244050	A	C	1.1461	0.0997	0.0159	8.65e-10
4	69716139	rs115997581	C	T	1.0288	-0.1254	0.0201	1.016e-09
4	69745127	rs115293372	T	C	0.9182	-0.1331	0.0213	1.03e-09
4	69767349	rs116446865	T	C	0.9146	-0.1332	0.0214	1.042e-09
4	69735877	rs113997869	C	T	0.93	-0.1313	0.0211	1.084e-09
4	69721662	rs115319921	T	C	0.93	-0.1313	0.0211	1.084e-09
4	69725113	rs115542835	G	T	0.93	-0.1313	0.0211	1.084e-09
4	69717641	rs116115181	C	T	0.93	-0.1313	0.0211	1.084e-09
4	69766993	rs114126014	T	C	0.9155	-0.1331	0.0214	1.086e-09
4	69710615	rs115102804	G	T	0.9292	-0.1313	0.0211	1.095e-09
4	69689001	rs149606678	A	G	1.2792	0.1961	0.0315	1.101e-09
4	69765782	rs115558925	A	C	0.9184	-0.1328	0.0213	1.142e-09
4	69630961	rs117386657	A	G	1.0041	-0.155	0.0249	1.153e-09
4	69750117	rs116221291	T	C	0.9202	-0.1326	0.0213	1.156e-09
4	69672645	rs116684908	A	G	1.2915	0.1934	0.0311	1.213e-09
4	69751951	rs115549616	C	G	0.9214	-0.1324	0.0213	1.232e-09
4	69724936	rs116293706	C	T	0.9332	-0.1192	0.0192	1.232e-09
4	69759351	rs115707640	C	T	0.9218	-0.1324	0.0213	1.235e-09
4	69749535	chr4:69749535:D	TG	T	0.9015	-0.1376	0.0222	1.24e-09
4	69749537	chr4:69749537:D	TA	T	0.9015	-0.1376	0.0222	1.24e-09
4	69673875	chr4:69673875:I	G	GC	1.2899	0.1929	0.0311	1.267e-09
4	69527144	rs146218549	A	G	0.8445	0.2079	0.0335	1.274e-09
4	69725968	rs115933485	C	T	0.9437	-0.1196	0.0193	1.303e-09
4	69665890	rs114474500	G	A	0.9405	-0.1201	0.0194	1.336e-09
4	69663760	chr4:69663760:D	TTTTG	T	0.933	-0.1188	0.0192	1.37e-09
4	69689633	rs114850007	A	T	1.308	0.1962	0.0318	1.482e-09
4	69765842	chr4:69765842:D	CA	C	0.91	-0.1332	0.0216	1.494e-09
4	69568721	rs75152210	G	A	0.9921	0.2226	0.0361	1.597e-09
4	69725272	chr4:69725272:D	TAGTG	T	0.9422	-0.1167	0.0189	1.632e-09
4	69742722	rs115612883	A	G	0.9226	-0.1316	0.0214	1.654e-09
4	69667720	rs115577688	C	T	0.941	-0.1183	0.0192	1.82e-09
4	69666880	rs115460213	C	G	0.9409	-0.1182	0.0193	1.848e-09
4	69769087	rs113996790	C	T	0.9153	-0.1317	0.0215	1.857e-09
4	69728015	rs116372253	A	T	0.9486	-0.1188	0.0194	1.872e-09
4	69728408	chr4:69728408:D	GA	G	0.9489	-0.1188	0.0194	1.873e-09
4	69729001	chr4:69729001:D	AATTAAC	A	0.9489	-0.1188	0.0194	1.873e-09
4	69727220	rs114711302	C	T	0.9489	-0.1188	0.0194	1.873e-09
4	69727258	rs114858759	G	C	0.9489	-0.1188	0.0194	1.873e-09
4	69723767	rs114866244	T	C	0.9489	-0.1188	0.0194	1.873e-09
4	69725006	rs115264860	C	T	0.9489	-0.1188	0.0194	1.873e-09
4	69731361	rs115292836	T	A	0.9489	-0.1188	0.0194	1.873e-09
4	69722960	rs116498746	C	T	0.9489	-0.1188	0.0194	1.873e-09
4	69727682	rs7674919	G	A	0.9489	-0.1188	0.0194	1.873e-09
4	69769999	rs116192600	C	G	0.913	-0.1317	0.0215	1.876e-09
4	69666349	rs115574850	A	G	0.9407	-0.1182	0.0193	1.877e-09
4	69768638	rs116023959	G	T	0.9179	-0.1316	0.0214	1.891e-09
4	69665785	rs115938276	C	T	0.9406	-0.1181	0.0193	1.906e-09
4	69664454	rs115169631	T	C	0.9407	-0.1178	0.0193	2.069e-09
4	69664437	rs116311199	A	G	0.9407	-0.1178	0.0193	2.069e-09
4	69664704	rs115204171	A	G	0.9359	-0.1182	0.0193	2.119e-09
4	69663298	rs115110082	C	A	0.9406	-0.1177	0.0192	2.139e-09
4	69662983	rs114544519	C	T	0.9405	-0.1176	0.0192	2.175e-09
4	69761131	rs114441621	T	C	0.927	-0.1306	0.0214	2.2e-09
4	69752439	rs115970480	C	T	0.927	-0.1306	0.0214	2.2e-09
4	69661413	rs115820371	C	T	0.9405	-0.1175	0.0192	2.252e-09
4	69660832	rs115235008	C	T	0.9405	-0.1175	0.0192	2.293e-09
4	69647347	rs61750900	T	G	1.046	0.1139	0.0187	2.313e-09
4	69660736	rs116429394	G	T	0.9405	-0.1174	0.0192	2.334e-09
4	69659898	rs147418383	T	A	0.9406	-0.1173	0.0192	2.377e-09
4	69684548	rs114004636	C	G	1.3167	0.1907	0.0313	2.391e-09
4	69659235	rs115630565	A	T	0.9406	-0.1172	0.0192	2.422e-09
4	69612344	rs137960876	C	T	1.0095	-0.1586	0.026	2.422e-09
4	69641776	rs115120773	C	T	0.9994	-0.1484	0.0244	2.536e-09
4	69641777	rs115804752	A	G	0.9994	-0.1484	0.0244	2.536e-09
4	69682471	rs294777	A	G	1.3198	0.1904	0.0313	2.571e-09
4	69569951	rs147821662	A	C	1.0124	0.2086	0.0344	2.91e-09
4	69577262	rs150209985	T	C	1.0141	0.2081	0.0344	2.979e-09
4	69651804	rs115322069	A	T	0.9422	-0.1164	0.0192	3.052e-09
4	69678930	rs114683110	C	G	1.2662	0.1873	0.0309	3.073e-09
4	69573577	rs149491272	A	G	1.0115	0.2075	0.0343	3.158e-09
4	69572901	rs145184520	A	G	1.0109	0.2074	0.0343	3.207e-09
4	69517584	rs144601374	T	G	0.7549	0.1043	0.0173	3.315e-09
4	69633094	rs116065955	C	T	0.9426	-0.1161	0.0192	3.335e-09
4	69634533	rs115988299	C	T	0.9428	-0.116	0.0192	3.376e-09
4	69634128	rs147929029	C	T	0.9428	-0.116	0.0192	3.376e-09
4	69641252	rs114936600	A	C	0.9433	-0.1159	0.0192	3.461e-09
4	69665571	rs115859082	A	C	1.1649	0.1986	0.0329	3.488e-09
4	69606254	rs114119885	T	G	1.016	-0.1554	0.0258	3.5e-09
4	69605785	rs117723056	T	G	1.016	-0.1554	0.0258	3.5e-09
4	69642799	rs114871968	C	G	0.9438	-0.1157	0.0192	3.553e-09
4	69645774	rs115411163	A	C	0.9438	-0.1157	0.0192	3.553e-09
4	69642889	rs115441964	C	G	0.9438	-0.1157	0.0192	3.553e-09
4	69645658	rs115598634	T	G	0.9438	-0.1157	0.0192	3.553e-09
4	69642698	rs116058697	C	T	0.9438	-0.1157	0.0192	3.553e-09
4	69646009	rs11726899	T	C	0.9438	-0.1157	0.0192	3.553e-09
4	69607267	rs114473144	T	C	1.0167	-0.1554	0.0258	3.557e-09
4	69614000	rs114365974	G	A	1.0186	-0.1552	0.0258	3.561e-09
4	69624191	rs115486062	T	C	1.0193	-0.1552	0.0258	3.62e-09
4	69625376	rs2271513	G	A	1.0193	-0.1552	0.0258	3.62e-09
4	69611639	chr4:69611639:I	G	GT	1.018	-0.1553	0.0258	3.629e-09
4	69612123	rs114698644	G	A	1.018	-0.1553	0.0258	3.629e-09
4	69609242	rs116402604	G	A	1.018	-0.1553	0.0258	3.629e-09
4	69707693	rs116011053	C	A	0.9275	-0.1255	0.0208	3.638e-09
4	69694073	rs115832004	G	A	0.909	-0.1225	0.0203	3.657e-09
4	69692608	rs114001254	A	T	0.9133	-0.1258	0.0209	3.804e-09
4	69610765	rs116300560	G	T	1.0122	-0.1561	0.026	3.827e-09
4	69691521	rs114467430	G	C	0.9319	-0.1008	0.0168	4.075e-09
4	69644905	chr4:69644905:D	GT	G	0.9668	-0.1749	0.0292	4.148e-09
4	69695007	rs116471971	A	C	0.9934	-0.1568	0.0262	4.218e-09
4	69546663	rs147404062	A	G	0.8741	0.212	0.0354	4.221e-09
4	69526585	rs145803268	A	G	0.7638	0.158	0.0264	4.272e-09
4	69701338	rs11737644	T	C	0.9291	-0.1257	0.021	4.61e-09
4	69657695	rs116715804	T	C	1.1592	-0.1965	0.0329	4.744e-09
4	69698380	rs115763151	G	T	0.9178	-0.1244	0.0208	4.862e-09
4	69722395	rs116144535	G	A	0.9132	-0.116	0.0194	5.031e-09
4	69709072	rs115988542	A	C	0.9489	-0.0998	0.0167	5.101e-09
4	69739572	rs752209	A	G	1.0165	-0.1511	0.0253	5.107e-09
4	69558554	rs149394447	C	T	1.0027	0.2027	0.0341	5.534e-09
4	69558270	rs143103948	T	C	1.0036	0.202	0.034	5.923e-09
4	69652787	rs116531272	G	A	1.1511	-0.1965	0.0331	5.95e-09
4	69705337	rs115597438	A	G	0.9534	-0.0992	0.0167	6.26e-09
4	69701067	rs11737566	T	G	0.9534	-0.0992	0.0167	6.26e-09
4	69706273	rs6843220	T	C	0.9534	-0.0992	0.0167	6.26e-09
4	69698255	rs145435483	A	T	0.9328	-0.0996	0.0168	6.323e-09
4	69864573	chr4:69864573:I	T	TAAC	1.0227	0.0957	0.0162	6.41e-09
4	69668714	rs115991625	C	T	1.0139	-0.1548	0.0262	6.642e-09
4	69668393	rs139365833	A	T	0.9391	-0.1801	0.0304	6.647e-09
4	69668395	rs145589934	T	C	0.9391	-0.1801	0.0304	6.647e-09
4	69668396	rs147713091	A	C	0.9391	-0.1801	0.0304	6.647e-09
4	69668391	rs150896747	G	C	0.9391	-0.1801	0.0304	6.647e-09
4	69669667	rs114318985	C	T	1.0138	-0.1548	0.0262	6.657e-09
4	69670461	rs116777851	A	G	1.0138	-0.1548	0.0262	6.657e-09
4	69572925	rs145253983	C	T	1.0115	0.1961	0.0332	6.894e-09
4	69658127	rs115987715	G	C	1.0157	-0.1543	0.0261	7.037e-09
4	69653964	rs114813628	G	A	1.0161	-0.1542	0.0261	7.044e-09
4	69654415	rs115227509	T	A	1.0161	-0.1542	0.0261	7.044e-09
4	69709945	rs114320121	A	T	1.268	0.1911	0.0324	7.089e-09
4	69639094	rs117079590	C	T	1.0169	-0.1537	0.0261	7.376e-09
4	69619429	rs113865757	C	T	1.16	-0.1881	0.0319	7.451e-09
4	69708143	rs114527270	C	T	1.2982	0.1811	0.0307	7.559e-09
4	69701609	rs116589258	T	A	1.2982	0.1811	0.0307	7.559e-09
4	69702631	rs115121855	T	G	1.2955	0.1817	0.0308	7.594e-09
4	69689445	rs115329518	G	A	0.9122	-0.0986	0.0167	7.671e-09
4	69719987	chr4:69719987:I	C	CA	0.9108	-0.1151	0.0195	7.746e-09
4	69720832	rs116184259	C	A	1.011	-0.1507	0.0256	8.017e-09
4	69588360	rs140507686	G	T	1.0121	-0.1989	0.0338	8.053e-09
4	69695818	rs150612934	G	A	1.3011	0.1808	0.0307	8.07e-09
4	69695310	rs11249509	G	A	1.3011	0.1808	0.0307	8.07e-09
4	69694941	rs294772	A	G	1.3011	0.1808	0.0307	8.07e-09
4	69710257	rs116532484	G	A	0.914	-0.1177	0.02	8.353e-09
4	69735706	chr4:69735706:D	TA	T	0.9153	-0.1176	0.02	8.4e-09
4	69732112	rs115109494	T	A	0.9154	-0.1176	0.02	8.559e-09
4	69721871	rs116020958	G	A	0.9154	-0.1176	0.02	8.559e-09
4	69731469	rs116118888	G	C	0.9154	-0.1176	0.02	8.559e-09
4	69694012	rs115455627	C	T	0.9064	-0.099	0.0169	8.596e-09
4	69674156	rs114745540	G	A	1.0197	-0.1543	0.0263	8.623e-09
4	69717836	rs115952417	A	T	0.9155	-0.1175	0.02	8.723e-09
4	69716229	rs116285470	C	A	0.9155	-0.1175	0.02	8.723e-09
4	69719579	rs116286898	G	A	0.9155	-0.1175	0.02	8.723e-09
4	69687676	chr4:69687676:D	AG	A	0.9187	0.0624	0.0106	8.972e-09
4	69677670	rs115650060	A	C	1.0138	-0.153	0.0262	1.051e-08
4	69686993	rs143733783	A	G	0.8371	-0.1083	0.0186	1.051e-08
4	69702791	rs114683433	T	C	0.9101	-0.1151	0.0197	1.068e-08
4	69701926	rs116219798	C	T	0.9101	-0.1151	0.0197	1.068e-08
4	69665635	rs114135904	A	C	0.6159	0.1714	0.0294	1.073e-08
4	69599806	rs115100695	T	A	1.0516	-0.199	0.0341	1.095e-08
4	69593008	rs111871300	C	T	1.035	-0.2019	0.0347	1.103e-08
4	69746719	rs114691164	C	A	1.0116	-0.1499	0.0258	1.128e-08
4	69735308	rs116535483	A	C	1.0081	-0.1495	0.0257	1.133e-08
4	69708443	rs9996074	G	T	1.0743	-0.1438	0.0247	1.153e-08
4	69722972	rs116115357	C	T	1.2418	0.1921	0.033	1.182e-08
4	69542758	rs141422444	T	G	0.9988	0.1998	0.0344	1.19e-08
4	69709471	rs115829597	A	G	1.2525	0.1838	0.0316	1.201e-08
4	69693635	chr4:69693635:D	CTA	C	0.896	-0.1151	0.0198	1.204e-08
4	69713406	rs114591972	T	C	1.238	0.1838	0.0317	1.221e-08
4	69724708	rs114184467	T	G	1.0161	-0.1493	0.0257	1.229e-08
4	69715929	rs117064712	A	T	1.2502	0.1839	0.0317	1.242e-08
4	69530098	rs140362887	A	T	0.9619	0.2049	0.0354	1.309e-08
4	69855163	rs147119243	T	C	1.0854	0.09	0.0155	1.346e-08
4	69855972	rs116228059	A	G	0.886	0.0887	0.0153	1.4e-08
4	69860055	rs116454332	T	C	0.9955	0.0893	0.0155	1.484e-08
4	69697187	rs115469184	G	A	0.9	-0.1139	0.0197	1.503e-08
4	69640823	chr4:69640823:I	G	GAAAT	0.9585	-0.1375	0.0239	1.61e-08
4	69723719	rs114006663	A	G	1.0311	-0.1579	0.0275	1.687e-08
4	69768551	rs115072211	C	T	0.9967	-0.1495	0.026	1.771e-08
4	69758701	rs115596782	C	T	1.0206	-0.1586	0.0276	1.778e-08
4	69523944	rs139141922	G	A	0.7946	0.1908	0.0333	1.835e-08
4	69762272	rs116121886	G	A	1.0182	-0.1587	0.0277	1.884e-08
4	69634703	rs182432374	T	C	1.029	-0.1552	0.0271	1.975e-08
4	70093260	rs141620393	T	C	0.6725	-0.1593	0.0279	2.163e-08
4	69861343	chr4:69861343:I	A	AAGCCTCTTG	0.8897	0.0888	0.0156	2.214e-08
4	69734159	rs116136678	C	A	0.9319	-0.1031	0.0181	2.257e-08
4	69731744	rs114498507	T	A	1.2226	0.1844	0.0324	2.297e-08
4	69864584	rs114861209	A	G	1.1045	0.1115	0.0196	2.397e-08
4	69865396	rs114828073	G	A	1.1042	0.1115	0.0196	2.417e-08
4	69864569	chr4:69864569:I	T	TTAA	1.0437	0.0916	0.0161	2.504e-08
4	67648243	rs10022278	T	C	0.7477	0.1683	0.0296	2.508e-08
4	69733021	rs115035797	G	A	1.2195	0.1844	0.0325	2.512e-08
4	69507981	rs147787378	A	T	0.8914	0.1698	0.03	2.727e-08
4	69854923	rs115324620	T	C	1.1005	0.1104	0.0195	2.882e-08
4	69528080	rs138443646	C	T	0.873	0.1793	0.0318	3.06e-08
4	69750318	rs143347282	A	T	1.0228	-0.1535	0.0272	3.067e-08
4	69735305	rs114617148	A	G	1.2154	0.184	0.0327	3.133e-08
4	69735409	rs116251694	T	C	1.2154	0.184	0.0327	3.133e-08
4	69736333	rs114534864	A	G	1.2117	0.1838	0.0328	3.631e-08
4	67645412	rs10866175	A	G	1.121	0.2329	0.0416	3.819e-08
4	69521410	rs148777721	T	C	0.8209	0.1964	0.0352	4.118e-08
4	69702037	chr4:69702037:I	C	CT	0.8584	-0.1208	0.0216	4.151e-08
4	69614445	rs114327546	T	A	1.0339	-0.1535	0.0275	4.271e-08
4	69610748	rs115229558	T	C	1.0272	-0.1544	0.0277	4.502e-08
4	69645263	rs139553936	T	C	0.8361	-0.1579	0.0284	4.53e-08
4	67648021	chr4:67648021:D	TA	T	1.1218	0.2298	0.0413	4.67e-08
